# Supplementary material for: OH level populations and accuracies of Einstein- A coefficients from hundreds of measured lines
Source: Copernicus journal article supplement (doi:10.5194/acp-20-5269-2020), 2020-05-06
Supplement: Supplementary file 1 [file acp-20-5269-2020-supplement.zip]

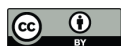

## *Supplement of*

# **OH level populations and accuracies of Einstein- $A$ coefficients from hundreds of measured lines**

**Stefan Noll et al.**

*Correspondence to:* Stefan Noll ([stefan.noll@dlr.de](mailto:stefan.noll@dlr.de))

- [acp-20-5269-2020-supplement-title-page.pdf](#)
- OHpop\_Acoeff\_figdata
  - OHpop\_Acoeff\_basic.dat
  - OHpop\_Acoeff\_fig04.dat
  - OHpop\_Acoeff\_fig05.dat
  - OHpop\_Acoeff\_fig06.dat
  - OHpop\_Acoeff\_fig07.dat
  - OHpop\_Acoeff\_fig08.dat
  - OHpop\_Acoeff\_fig09.dat
  - OHpop\_Acoeff\_fig10.dat
  - OHpop\_Acoeff\_fig11a.dat
  - OHpop\_Acoeff\_fig11b.dat
  - OHpop\_Acoeff\_fig11c.dat
  - OHpop\_Acoeff\_fig12.dat
  - OHpop\_Acoeff\_fig13.dat
  - OHpop\_Acoeff\_fig14.dat

The copyright of individual parts of the supplement might differ from the CC BY 4.0 License.
