# Supplementary material for: OH level populations and accuracies of Einstein- A coefficients from hundreds of measured lines
Source: Copernicus journal article supplement (doi:10.5194/acp-20-5269-2020), 2020-05-06
Supplement: Supplementary file 2 [file acp-20-5269-2020-supplement.zip]

Archive with 16 entries (15 files):
- OHpop_Acoeff_figdata/
- OHpop_Acoeff_figdata/OHpop_Acoeff_fig12.dat
- OHpop_Acoeff_figdata/OHpop_Acoeff_fig09.dat
- OHpop_Acoeff_figdata/OHpop_Acoeff_fig13.dat
- OHpop_Acoeff_figdata/OHpop_Acoeff_basic.dat
- OHpop_Acoeff_figdata/OHpop_Acoeff_fig06.dat
- OHpop_Acoeff_figdata/OHpop_Acoeff_fig11a.dat
- OHpop_Acoeff_figdata/OHpop_Acoeff_fig11c.dat
- OHpop_Acoeff_figdata/OHpop_Acoeff_fig05.dat
- OHpop_Acoeff_figdata/OHpop_Acoeff_fig10.dat
- OHpop_Acoeff_figdata/OHpop_Acoeff_fig11b.dat
- OHpop_Acoeff_figdata/OHpop_Acoeff_fig04.dat
- OHpop_Acoeff_figdata/OHpop_Acoeff_fig08.dat
- OHpop_Acoeff_figdata/OHpop_Acoeff_fig14.dat
- OHpop_Acoeff_figdata/OHpop_Acoeff_fig07.dat
- acp-20-5269-2020-supplement-title-page.pdf
