# Supplementary material for: OH level populations and accuracies of Einstein- A coefficients from hundreds of measured lines
Source: Copernicus journal article supplement (doi:10.5194/acp-20-5269-2020), 2020-05-06
Supplement: Supplementary file 2 [file acp-20-5269-2020-supplement.zip › OHpop_Acoeff_figdata/OHpop_Acoeff_basic.dat]

# Basic data for figures (especially Figs. 2 and 3) in
# 'OH level populations and accuracies of Einstein-A coefficients
# from hundreds of measured lines'
# by Noll et al.
#
# Columns:
# (1) line ID of type 'OH'+v'+v''+branch+F'+N'
# (2) central wavelength of Lambda doublet in mum (origin: B+16)
# (3) offset for wavelength of f component in pm (opposite sign for p' = e)
# (4) mean upper state energy E' of Lambda doublet in cm^(-1) (origin: B+16)
# (5) shift of E' for f component in cm^(-1) (opposite sign for p' = e)
# (6) number of averaged UVES spectra
# (7) combined (= 1) or separate (= 2) measurement of Lambda doublet
# (8) intensity of Lambda doublet in R
# (9) intensity of e component in R
# (10) intensity of f component in R
# (11) quality flag with primary (0 - 3) and secondary (0 - 3) classifier
#      (0 = uncertain, 1 = only e component, 2 = only f component, 3 = reliable)
# (12) combined upper state statistical weight g' for Lambda doublet
# Einstein-A coefficients in s^(-1):
# (13) B+16 for Lambda doublet
# (14) B+16 for e component
# (15) B+16 for f component
# (16) corrected B+16 for Lambda doublet
# (17) corrected B+16 for e component
# (18) corrected B+16 for f component
# (19) HITRAN for Lambda doublet
# (20) vdLG08 for Lambda doublet
# (21) TL89 for Lambda doublet
# (22) LWR86 for Lambda doublet
# (23) M74 for Lambda doublet
# Remark: 1.000e+15 for missing values
#
#       1          2       3         4      5    6  7           8           9          10  11   12         13         14         15         16         17         18         19         20         21         22         23
 OH30P101  0.9874843     7.7  10210.57   0.02  301  1   2.949e+02   1.474e+02   1.474e+02  33   16  3.354e-01  3.354e-01  3.354e-01  3.335e-01  3.335e-01  3.335e-01  4.771e-01  3.182e-01  8.480e-01  2.910e-01  3.880e-01 
 OH30P102  0.9917391    14.2  10285.45   0.08  298  1   3.130e+02   1.565e+02   1.565e+02  33   24  4.115e-01  4.115e-01  4.114e-01  4.070e-01  4.070e-01  4.070e-01  5.799e-01  3.905e-01  1.016e+00  3.590e-01  4.710e-01 
 OH30P103  0.9964662    21.7  10390.98   0.18  301  1   2.017e+02   1.009e+02   1.009e+02  33   32  4.444e-01  4.445e-01  4.444e-01  4.374e-01  4.374e-01  4.374e-01  6.208e-01  4.218e-01  1.073e+00  3.900e-01  5.040e-01 
 OH30P104  1.0016732    29.6  10527.51   0.32  301  2   8.840e+01   4.448e+01   4.392e+01  33   40  4.646e-01  4.647e-01  4.646e-01  4.549e-01  4.571e-01  4.526e-01  6.432e-01  4.409e-01  1.096e+00  4.090e-01  5.220e-01 
 OH30P105  1.0073640    38.0  10695.26   0.51  300  2   3.504e+01   1.730e+01   1.774e+01  33   48  4.796e-01  4.796e-01  4.795e-01  4.671e-01  4.774e-01  4.566e-01  6.586e-01  4.549e-01  1.106e+00  4.230e-01  5.340e-01 
 OH30P106  1.0135424    46.8  10894.32   0.73  299  2   1.009e+01   5.847e+00   4.240e+00  33   56  4.919e-01  4.919e-01  4.918e-01  4.765e-01  4.953e-01  4.575e-01  6.700e-01  4.662e-01  1.109e+00  4.350e-01  5.440e-01 
 OH30P107  1.0202144    56.2  11124.66   0.98  299  2   5.722e+00   3.253e+00   2.469e+00  30   64  5.024e-01  5.025e-01  5.023e-01  4.842e-01  5.115e-01  4.564e-01  6.789e-01  4.758e-01  1.107e+00  4.460e-01  5.510e-01 
 OH30P201  0.9851185     6.0  10338.69   0.07  300  1   8.585e+01   4.293e+01   4.293e+01  33    8  5.267e-01  5.266e-01  5.267e-01  5.238e-01  5.238e-01  5.238e-01  7.540e-01  4.987e-01  1.357e+00  4.710e-01  6.120e-01 
 OH30P202  0.9897459     2.2  10392.51   0.11  300  1   1.070e+02   5.351e+01   5.351e+01  33   16  4.932e-01  4.932e-01  4.933e-01  4.880e-01  4.880e-01  4.880e-01  6.984e-01  4.674e-01  1.237e+00  4.400e-01  5.670e-01 
 OH30P204  1.0002739    -9.5  10605.46   0.09  300  1   4.275e+01   2.137e+01   2.137e+01  33   32  4.904e-01  4.903e-01  4.905e-01  4.801e-01  4.801e-01  4.801e-01  6.808e-01  4.650e-01  1.168e+00  4.370e-01  5.530e-01 
 OH30P205  1.0061783   -16.3  10763.27   0.02  300  1   1.936e+01   9.682e+00   9.682e+00  33   40  4.964e-01  4.963e-01  4.965e-01  4.834e-01  4.834e-01  4.834e-01  6.830e-01  4.706e-01  1.153e+00  4.420e-01  5.540e-01 
 OH30P206  1.0125257   -23.4  10954.48  -0.10  300  1   5.252e+00   2.626e+00   2.626e+00  03   48  5.035e-01  5.035e-01  5.036e-01  4.878e-01  4.685e-01  5.071e-01  6.868e-01  4.772e-01  1.142e+00  4.490e-01  5.570e-01 
 OH30Q101  0.9793802    -4.7  10210.57   0.02  300  1   3.594e+02   1.797e+02   1.797e+02  33   16  4.423e-01  4.423e-01  4.423e-01  4.266e-01  4.266e-01  4.266e-01  6.443e-01  4.181e-01  1.187e+00  3.870e-01  5.240e-01 
 OH30Q102  0.9802356   -17.3  10285.45   0.08  300  1   1.243e+02   6.214e+01   6.214e+01  30   24  1.799e-01  1.799e-01  1.798e-01  1.651e-01  1.651e-01  1.651e-01  2.621e-01  1.697e-01  4.820e-01  1.580e-01  2.130e-01 
 OH30Q103  0.9814674   -38.9  10390.98   0.18  300  2   3.924e+01   1.940e+01   1.984e+01  33   32  9.435e-02  9.437e-02  9.433e-02  8.242e-02  8.209e-02  8.275e-02  1.375e-01  8.885e-02  2.530e-01  8.300e-02  1.120e-01 
 OH30Q104  0.9830918   -69.5  10527.51   0.32  300  2   9.626e+00   4.953e+00   4.674e+00  33   40  5.677e-02  5.679e-02  5.676e-02  4.720e-02  4.547e-02  4.893e-02  8.268e-02  5.338e-02  1.520e-01  5.000e-02  6.700e-02 
 OH30Q105  0.9851200  -108.9  10695.26   0.50  300  2   2.214e+00   1.035e+00   1.179e+00  30   48  3.733e-02  3.735e-02  3.732e-02  2.954e-02  2.750e-02  3.159e-02  5.432e-02  3.505e-02  9.900e-02  3.300e-02  4.400e-02 
 OH30Q201  0.9792100   -14.1  10338.69   0.07  300  1   4.186e+01   2.093e+01   2.093e+01  33    8  2.554e-01  2.554e-01  2.554e-01  2.463e-01  2.463e-01  2.463e-01  3.720e-01  2.417e-01  6.850e-01  2.230e-01  3.020e-01 
 OH30Q202  0.9799225   -23.5  10392.51   0.11  300  1   1.143e+01   5.715e+00   5.715e+00  33   16  5.695e-02  5.695e-02  5.695e-02  5.228e-02  5.228e-02  5.228e-02  8.283e-02  5.410e-02  1.520e-01  5.000e-02  6.700e-02 
 OH30Q203  0.9810901   -25.1  10481.65   0.12  300  2   9.192e+00   1.923e+00   7.269e+00  11   24  2.803e-02  2.804e-02  2.803e-02  2.449e-02  2.449e-02  2.449e-02  4.070e-02  2.671e-02  7.500e-02  2.400e-02  3.300e-02 
 OH30Q204  0.9826960   -17.8  10605.46   0.09  300  1   1.189e+00   5.947e-01   5.947e-01  30   32  1.789e-02  1.790e-02  1.788e-02  1.487e-02  1.487e-02  1.487e-02  2.592e-02  1.707e-02  4.700e-02  1.600e-02  2.100e-02 
 OH30R102  0.9722496    -4.9  10285.45   0.08  301  1   1.405e+02   7.027e+01   7.027e+01  33   24  1.878e-01  1.878e-01  1.878e-01  1.898e-01  1.898e-01  1.898e-01  2.808e-01  1.774e-01  5.370e-01  1.660e-01  2.280e-01 
 OH30R103  0.9701997    -7.4  10390.98   0.18  300  1   1.076e+02   5.381e+01   5.381e+01  33   32  2.403e-01  2.403e-01  2.402e-01  2.441e-01  2.441e-01  2.441e-01  3.637e-01  2.265e-01  7.060e-01  2.100e-01  2.960e-01 
 OH30R104  0.9684899    -9.2  10527.51   0.32  300  1   5.350e+01   2.675e+01   2.675e+01  33   40  2.560e-01  2.560e-01  2.559e-01  2.615e-01  2.615e-01  2.615e-01  3.925e-01  2.408e-01  7.740e-01  2.230e-01  3.190e-01 
 OH30R106  0.9661734   -10.2  10894.32   0.73  300  1   6.040e+00   3.020e+00   3.020e+00  33   56  2.514e-01  2.515e-01  2.514e-01  2.595e-01  2.595e-01  2.595e-01  3.965e-01  2.351e-01  8.070e-01  2.160e-01  3.230e-01 
 OH30R108  0.9654192    -8.1  11386.13   1.27  300  1   1.579e+00   7.897e-01   7.897e-01  33   72  2.303e-01  2.303e-01  2.302e-01  2.402e-01  2.402e-01  2.402e-01  3.751e-01  2.136e-01  7.880e-01  1.960e-01  3.070e-01 
 OH30R202  0.9740759    -3.4  10392.51   0.11  300  1   5.167e+01   2.584e+01   2.584e+01  33   16  2.322e-01  2.321e-01  2.322e-01  2.347e-01  2.347e-01  2.347e-01  3.447e-01  2.191e-01  6.500e-01  1.980e-01  2.800e-01 
 OH30R203  0.9714370     0.5  10481.65   0.12  300  1   4.630e+01   2.315e+01   2.315e+01  33   24  2.662e-01  2.661e-01  2.662e-01  2.705e-01  2.705e-01  2.705e-01  4.006e-01  2.508e-01  7.690e-01  2.270e-01  3.260e-01 
 OH30R204  0.9693163     4.1  10605.46   0.09  300  1   2.570e+01   1.285e+01   1.285e+01  33   32  2.716e-01  2.715e-01  2.716e-01  2.774e-01  2.774e-01  2.774e-01  4.144e-01  2.553e-01  8.100e-01  2.310e-01  3.370e-01 
 OH30R205  0.9676889     6.9  10763.27   0.02  300  1   1.049e+01   5.246e+00   5.246e+00  33   40  2.672e-01  2.671e-01  2.672e-01  2.743e-01  2.743e-01  2.743e-01  4.136e-01  2.505e-01  8.230e-01  2.270e-01  3.370e-01 
 OH30R206  0.9665309     8.9  10954.48  -0.10  301  1   6.111e+00   3.056e+00   3.056e+00  03   48  2.582e-01  2.581e-01  2.582e-01  2.665e-01  2.665e-01  2.665e-01  4.058e-01  2.413e-01  8.220e-01  2.190e-01  3.310e-01 
 OH30R207  0.9658247    10.0  11178.52  -0.25  299  1   1.884e+00   9.422e-01   9.422e-01  33   56  2.467e-01  2.466e-01  2.467e-01  2.560e-01  2.560e-01  2.560e-01  3.941e-01  2.298e-01  8.130e-01  2.080e-01  3.210e-01 
 OH30R209  0.9657272    10.1  11723.06  -0.66  299  1   9.602e-01   4.801e-01   4.801e-01  33   72  2.199e-01  2.199e-01  2.199e-01  2.306e-01  2.306e-01  2.306e-01  3.638e-01  2.031e-01  7.770e-01  1.840e-01  2.980e-01 
 OH40P101  0.7573830     4.6  13287.18   0.02  301  1   1.977e+01   9.884e+00   9.884e+00  33   16  3.400e-02  3.400e-02  3.400e-02  2.948e-02  2.948e-02  2.948e-02  5.716e-02  3.650e-02  1.240e-01  2.800e-02  4.100e-02 
 OH40P102  0.7600535     8.8  13359.12   0.07  301  1   2.232e+01   1.116e+01   1.116e+01  30   24  4.205e-02  4.205e-02  4.205e-02  3.683e-02  3.683e-02  3.683e-02  6.957e-02  4.507e-02  1.480e-01  3.500e-02  4.900e-02 
 OH40P103  0.7630724    13.5  13460.43   0.16  301  1   1.551e+01   7.757e+00   7.757e+00  30   32  4.578e-02  4.578e-02  4.578e-02  4.051e-02  4.051e-02  4.051e-02  7.462e-02  4.899e-02  1.550e-01  3.900e-02  5.200e-02 
 OH40P104  0.7664472    18.8  13591.43   0.30  496  2   7.456e+00   3.798e+00   3.658e+00  33   40  4.823e-02  4.823e-02  4.823e-02  4.312e-02  4.333e-02  4.291e-02  7.744e-02  5.151e-02  1.580e-01  4.100e-02  5.400e-02 
 OH40P105  0.7701824    24.4  13752.30   0.47  532  2   3.217e+00   1.730e+00   1.487e+00  33   48  5.015e-02  5.015e-02  5.015e-02  4.529e-02  4.630e-02  4.428e-02  7.939e-02  5.344e-02  1.590e-01  4.200e-02  5.400e-02 
 OH40P106  0.7742824    30.4  13943.12   0.67  532  2   1.078e+00   5.658e-01   5.126e-01  33   56  5.179e-02  5.180e-02  5.179e-02  4.726e-02  4.912e-02  4.538e-02  8.089e-02  5.506e-02  1.590e-01  4.400e-02  5.400e-02 
 OH40P107  0.7787520    36.8  14163.86   0.91  532  2   6.055e-01   4.218e-01   1.837e-01  11   64  5.326e-02  5.326e-02  5.325e-02  4.910e-02  5.187e-02  4.628e-02  8.212e-02  5.647e-02  1.580e-01  4.500e-02  5.300e-02 
 OH40P108  0.7835975    43.7  14414.36   1.18  532  2   9.105e-01   7.390e-01   1.714e-01  22   72  5.459e-02  5.460e-02  5.458e-02  5.084e-02  5.458e-02  4.703e-02  8.314e-02  5.772e-02  1.570e-01  4.600e-02  5.200e-02 
 OH40P110  0.7944470    58.8  15003.72   1.81  532  2   3.692e-01   2.303e-01   1.389e-01  13   88  5.694e-02  5.696e-02  5.693e-02  5.413e-02  5.992e-02  4.817e-02  8.470e-02  5.977e-02  1.550e-01  4.800e-02  4.100e-02 
 OH40P111  0.8004696    67.2  15341.94   2.15  532  2   6.939e-01   4.248e-01   2.690e-01  22   96  5.798e-02  5.800e-02  5.797e-02  5.568e-02  6.256e-02  4.857e-02  8.529e-02  6.059e-02  1.530e-01  4.900e-02  3.900e-02 
 OH40P112  0.8069056    76.1  15708.67   2.52  532  2   4.715e-01   2.867e-01   1.848e-01  33  104  5.894e-02  5.895e-02  5.892e-02  5.718e-02  6.517e-02  4.888e-02  8.574e-02  6.128e-02  1.510e-01  4.900e-02  3.800e-02 
 OH40P113  0.8137674    85.7  16103.44   2.91  532  2   4.293e-01   2.525e-01   1.768e-01  33  112  5.982e-02  5.983e-02  5.980e-02  5.863e-02  6.776e-02  4.908e-02  8.609e-02  6.184e-02  1.480e-01  5.000e-02  3.600e-02 
 OH40P114  0.8210693    95.9  16525.76   3.32  532  2   5.969e-01   4.240e-01   1.729e-01  22  120  6.062e-02  6.064e-02  6.060e-02  6.003e-02  7.032e-02  4.920e-02  8.631e-02  6.227e-02  1.460e-01  5.000e-02  3.500e-02 
 OH40P115  0.8288266   106.8  16975.09   3.74  532  2   4.525e-01   2.426e-01   2.099e-01  11  128  6.137e-02  6.139e-02  6.134e-02  6.139e-02  7.287e-02  4.924e-02  8.642e-02  6.258e-02  1.000e+16  5.100e-02  3.400e-02 
 OH40P116  0.8370566   118.5  17450.84   4.17  532  2   4.017e-01   2.486e-01   1.530e-01  23  136  6.205e-02  6.207e-02  6.202e-02  6.271e-02  7.539e-02  4.920e-02  8.646e-02  6.276e-02  1.000e+16  1.000e+16  1.000e+16 
 OH40P117  0.8457781   131.0  17952.40   4.62  532  2   4.106e-01   2.530e-01   1.576e-01  23  144  6.268e-02  6.271e-02  6.265e-02  6.399e-02  7.788e-02  4.910e-02  8.636e-02  6.283e-02  1.000e+16  1.000e+16  1.000e+16 
 OH40P119  0.8647807   158.8  19030.27   5.53  230  2   2.896e+00   1.751e-01   2.721e+00  11  160  6.379e-02  6.383e-02  6.376e-02  6.648e-02  8.282e-02  4.871e-02  8.592e-02  6.264e-02  1.000e+16  1.000e+16  1.000e+16 
 OH40P120  0.8751099   174.2  19605.16   5.99  529  2   1.990e-01   1.688e-01   3.022e-02  11  168  6.429e-02  6.433e-02  6.425e-02  6.768e-02  8.526e-02  4.843e-02  8.562e-02  6.240e-02  1.000e+16  1.000e+16  1.000e+16 
 OH40P121  0.8860270   190.6  20203.03   6.45  529  2   1.787e-01   9.941e-02   7.924e-02  02  176  6.474e-02  6.478e-02  6.470e-02  6.886e-02  8.768e-02  4.811e-02  8.522e-02  6.206e-02  1.000e+16  1.000e+16  1.000e+16 
 OH40P123  0.9097508   227.4  21464.49   7.36  530  2   4.839e+00   4.707e+00   1.321e-01  20  192  6.552e-02  6.557e-02  6.547e-02  7.113e-02  9.243e-02  4.731e-02  8.421e-02  6.113e-02  1.000e+16  1.000e+16  1.000e+16 
 OH40P124  0.9226287   247.9  22126.40   7.81  530  2   2.411e-01   1.510e-01   9.019e-02  30  200  6.583e-02  6.588e-02  6.578e-02  7.220e-02  9.473e-02  4.683e-02  8.364e-02  6.055e-02  1.000e+16  1.000e+16  1.000e+16 
 OH40P201  0.7559573     3.8  13415.88   0.06  301  1   5.717e+00   2.859e+00   2.859e+00  33    8  5.317e-02  5.316e-02  5.318e-02  4.610e-02  4.610e-02  4.610e-02  9.036e-02  5.705e-02  1.990e-01  4.600e-02  6.500e-02 
 OH40P202  0.7588182     1.6  13467.30   0.11  301  1   7.382e+00   3.691e+00   3.691e+00  33   16  5.025e-02  5.024e-02  5.026e-02  4.402e-02  4.402e-02  4.402e-02  8.383e-02  5.384e-02  1.800e-01  4.300e-02  6.000e-02 
 OH40P203  0.7620148    -1.6  13552.47   0.12  301  1   5.918e+00   2.959e+00   2.959e+00  33   24  5.011e-02  5.010e-02  5.011e-02  4.434e-02  4.434e-02  4.434e-02  8.213e-02  5.359e-02  1.730e-01  4.300e-02  5.800e-02 
 OH40P204  0.7655421    -5.5  13670.84   0.09  343  1   3.526e+00   1.763e+00   1.763e+00  33   32  5.081e-02  5.080e-02  5.082e-02  4.542e-02  4.542e-02  4.542e-02  8.192e-02  5.425e-02  1.690e-01  4.300e-02  5.700e-02 
 OH40P206  0.7736047   -14.5  14004.68  -0.08  532  1   8.839e-01   4.419e-01   4.419e-01  30   48  5.296e-02  5.295e-02  5.297e-02  4.832e-02  4.641e-02  5.024e-02  8.291e-02  5.630e-02  1.640e-01  4.500e-02  5.500e-02 
 OH40P207  0.7781566   -19.5  14219.05  -0.23  532  2   4.028e-01   1.813e-01   2.214e-01  33   56  5.411e-02  5.411e-02  5.412e-02  4.988e-02  4.704e-02  5.272e-02  8.358e-02  5.738e-02  1.620e-01  4.600e-02  5.400e-02 
 OH40P210  0.7940175   -37.1  15045.87  -0.84  532  2   2.976e-01   1.151e-01   1.825e-01  33   80  5.736e-02  5.735e-02  5.737e-02  5.452e-02  4.856e-02  6.041e-02  8.539e-02  6.021e-02  1.560e-01  4.800e-02  4.100e-02 
 OH40P212  0.8065445   -51.1  15745.21  -1.38  532  2   3.397e-01   1.507e-01   1.890e-01  11   96  5.923e-02  5.922e-02  5.924e-02  5.746e-02  4.918e-02  6.557e-02  8.621e-02  6.159e-02  1.510e-01  5.000e-02  3.800e-02 
 OH40P213  0.8134328   -58.9  16137.77  -1.69  532  2   3.393e-01   1.202e-01   2.190e-01  31  104  6.006e-02  6.005e-02  6.008e-02  5.887e-02  4.936e-02  6.814e-02  8.648e-02  6.211e-02  1.490e-01  5.000e-02  3.700e-02 
 OH40P214  0.8207570   -67.3  16558.17  -2.01  532  2   2.999e-01   1.074e-01   1.925e-01  33  112  6.084e-02  6.082e-02  6.085e-02  6.024e-02  4.946e-02  7.070e-02  8.665e-02  6.250e-02  1.470e-01  5.100e-02  3.500e-02 
 OH40P215  0.8285335   -76.3  17005.82  -2.36  532  2   4.209e-01   1.143e-01   3.066e-01  11  120  6.155e-02  6.154e-02  6.157e-02  6.157e-02  4.949e-02  7.324e-02  8.672e-02  6.278e-02  1.440e-01  5.100e-02  3.400e-02 
 OH40P217  0.8455157   -96.3  17980.37  -3.08  532  2   2.946e-01   1.225e-01   1.721e-01  01  136  6.282e-02  6.280e-02  6.284e-02  6.414e-02  4.934e-02  7.827e-02  8.662e-02  6.299e-02  1.000e+16  1.000e+16  1.000e+16 
 OH40P218  0.8547618  -107.5  18505.92  -3.47  230  2   5.891e-01   3.594e-01   2.297e-01  23  144  6.339e-02  6.336e-02  6.341e-02  6.538e-02  4.917e-02  8.076e-02  8.643e-02  6.293e-02  1.000e+16  1.000e+16  1.000e+16 
 OH40P219  0.8645413  -119.4  19056.06  -3.86  230  2   2.552e+00   6.801e-02   2.484e+00  01  152  6.391e-02  6.388e-02  6.393e-02  6.660e-02  4.895e-02  8.324e-02  8.615e-02  6.277e-02  1.000e+16  1.000e+16  1.000e+16 
 OH40P220  0.8748797  -132.2  19630.04  -4.25  529  2   3.129e-01   9.883e-02   2.141e-01  33  160  6.439e-02  6.436e-02  6.442e-02  6.779e-02  4.868e-02  8.571e-02  8.580e-02  6.252e-02  1.000e+16  1.000e+16  1.000e+16 
 OH40P221  0.8858048  -146.0  20227.08  -4.65  529  2   3.627e-01   1.082e-01   2.545e-01  32  168  6.484e-02  6.481e-02  6.487e-02  6.896e-02  4.837e-02  8.816e-02  8.535e-02  6.217e-02  1.000e+16  1.000e+16  1.000e+16 
 OH40P222  0.8973474  -160.8  20846.39  -5.05  529  2   2.716e-01   8.955e-02   1.820e-01  30  176  6.524e-02  6.521e-02  6.528e-02  7.010e-02  4.800e-02  9.058e-02  8.489e-02  6.174e-02  1.000e+16  1.000e+16  1.000e+16 
 OH40P223  0.9095413  -176.8  21487.13  -5.45  529  2   3.783e-01   2.241e-01   1.542e-01  22  184  6.560e-02  6.556e-02  6.564e-02  7.121e-02  4.758e-02  9.297e-02  8.436e-02  6.122e-02  1.000e+16  1.000e+16  1.000e+16 
 OH40P224  0.9224241  -194.0  22148.44  -5.85  530  2   5.335e-01   3.279e-01   2.056e-01  22  192  6.590e-02  6.586e-02  6.594e-02  7.228e-02  4.711e-02  9.531e-02  8.378e-02  6.063e-02  1.000e+16  1.000e+16  1.000e+16 
 OH40Q101  0.7526065    -2.7  13287.18   0.02  449  1   2.582e+01   1.291e+01   1.291e+01  33   16  4.396e-02  4.396e-02  4.396e-02  3.625e-02  3.625e-02  3.625e-02  7.716e-02  4.728e-02  1.760e-01  3.700e-02  5.500e-02 
 OH40Q102  0.7532786    -9.8  13359.12   0.07  326  1   8.130e+00   4.065e+00   4.065e+00  33   24  1.790e-02  1.790e-02  1.790e-02  1.289e-02  1.289e-02  1.289e-02  3.143e-02  1.922e-02  7.200e-02  1.500e-02  2.200e-02 
 OH40Q103  0.7542457   -22.1  13460.43   0.16  301  2   2.353e+00   1.154e+00   1.199e+00  33   32  9.403e-03  9.406e-03  9.399e-03  5.917e-03  5.894e-03  5.941e-03  1.651e-02  1.008e-02  3.800e-02  8.000e-03  1.100e-02 
 OH40Q104  0.7555205   -39.6  13591.43   0.30  301  2   5.633e-01   2.700e-01   2.933e-01  33   40  5.666e-03  5.669e-03  5.663e-03  3.115e-03  3.001e-03  3.229e-03  9.952e-03  6.062e-03  2.300e-02  5.000e-03  7.000e-03 
 OH40Q105  0.7571120   -62.2  13752.30   0.47  301  2   1.250e-01   5.830e-02   6.666e-02  30   48  3.732e-03  3.734e-03  3.730e-03  1.792e-03  1.669e-03  1.917e-03  6.551e-03  3.986e-03  1.500e-02  3.000e-03  4.000e-03 
 OH40Q201  0.7524730    -8.1  13415.88   0.06  452  1   2.591e+00   1.295e+00   1.295e+00  33    8  2.537e-02  2.537e-02  2.537e-02  2.092e-02  2.092e-02  2.092e-02  4.448e-02  2.731e-02  1.010e-01  2.100e-02  3.200e-02 
 OH40Q202  0.7530306   -13.5  13467.30   0.11  366  1   7.045e-01   3.522e-01   3.522e-01  33   16  5.641e-03  5.641e-03  5.641e-03  4.064e-03  4.064e-03  4.064e-03  9.876e-03  6.092e-03  2.200e-02  5.000e-03  7.000e-03 
 OH40Q203  0.7539450   -14.5  13552.47   0.12  301  1   2.713e-01   1.356e-01   1.356e-01  33   24  2.771e-03  2.771e-03  2.770e-03  1.744e-03  1.744e-03  1.744e-03  4.843e-03  2.999e-03  1.100e-02  2.000e-03  3.000e-03 
 OH40Q204  0.7552035   -10.4  13670.84   0.09  301  1   6.910e-02   3.455e-02   3.455e-02  30   32  1.767e-03  1.768e-03  1.766e-03  9.717e-04  9.717e-04  9.717e-04  3.081e-03  1.915e-03  7.000e-03  1.000e-03  2.000e-03 
 OH40Q205  0.7567979    -1.2  13821.76   0.02  301  1   1.094e-02   5.468e-03   5.468e-03  03   40  1.276e-03  1.277e-03  1.274e-03  6.127e-04  6.127e-04  6.127e-04  2.218e-03  1.381e-03  5.000e-03  1.000e-03  1.000e-03 
 OH40R102  0.7485536    -2.5  13359.12   0.07  532  1   9.054e+00   4.527e+00   4.527e+00  33   24  1.816e-02  1.816e-02  1.816e-02  1.515e-02  1.515e-02  1.515e-02  3.348e-02  1.965e-02  8.000e-02  1.500e-02  2.300e-02 
 OH40R103  0.7475735    -3.6  13460.43   0.16  532  1   7.056e+00   3.528e+00   3.528e+00  33   32  2.295e-02  2.295e-02  2.294e-02  1.895e-02  1.895e-02  1.895e-02  4.327e-02  2.485e-02  1.060e-01  1.900e-02  3.000e-02 
 OH40R104  0.7468667    -4.1  13591.43   0.30  532  1   3.503e+00   1.751e+00   1.751e+00  33   40  2.411e-02  2.412e-02  2.411e-02  1.971e-02  1.971e-02  1.971e-02  4.661e-02  2.614e-02  1.170e-01  2.000e-02  3.100e-02 
 OH40R106  0.7463294    -3.2  13943.12   0.67  532  1   4.167e-01   2.083e-01   2.083e-01  33   56  2.296e-02  2.296e-02  2.295e-02  1.839e-02  1.839e-02  1.839e-02  4.692e-02  2.491e-02  1.230e-01  1.800e-02  2.900e-02 
 OH40R107  0.7465197    -1.9  14163.86   0.91  532  1   1.854e-01   9.268e-02   9.268e-02  33   64  2.170e-02  2.171e-02  2.170e-02  1.721e-02  1.721e-02  1.721e-02  4.576e-02  2.355e-02  1.230e-01  1.700e-02  2.700e-02 
 OH40R111  0.7504918     8.3  15341.94   2.15  525  1   9.583e-02   4.792e-02   4.792e-02  30   96  1.557e-02  1.557e-02  1.557e-02  1.185e-02  1.185e-02  1.185e-02  3.824e-02  1.673e-02  1.140e-01  1.100e-02  1.100e-02 
 OH40R112  0.7523144    12.2  15708.67   2.52  457  1   8.402e-02   4.201e-02   4.201e-02  33  104  1.401e-02  1.401e-02  1.401e-02  1.055e-02  1.055e-02  1.055e-02  3.604e-02  1.496e-02  1.110e-01  9.000e-03  9.000e-03 
 OH40R113  0.7544801    16.5  16103.44   2.91  301  1   8.729e-02   4.365e-02   4.365e-02  30  112  1.249e-02  1.249e-02  1.249e-02  9.314e-03  9.395e-03  9.230e-03  3.380e-02  1.322e-02  1.070e-01  8.000e-03  7.000e-03 
 OH40R202  0.7495733    -1.7  13467.30   0.11  532  1   3.330e+00   1.665e+00   1.665e+00  33   16  2.267e-02  2.266e-02  2.267e-02  1.891e-02  1.891e-02  1.891e-02  4.118e-02  2.444e-02  9.700e-02  1.800e-02  2.900e-02 
 OH40R203  0.7482313     0.6  13552.47   0.12  532  1   2.957e+00   1.479e+00   1.479e+00  33   24  2.563e-02  2.563e-02  2.564e-02  2.117e-02  2.117e-02  2.117e-02  4.775e-02  2.769e-02  1.160e-01  2.000e-02  3.300e-02 
 OH40R204  0.7472765     2.5  13670.84   0.09  532  1   1.639e+00   8.195e-01   8.195e-01  33   32  2.576e-02  2.576e-02  2.577e-02  2.106e-02  2.106e-02  2.106e-02  4.929e-02  2.787e-02  1.220e-01  2.000e-02  3.300e-02 
 OH40R205  0.7466925     3.8  13821.76   0.02  532  1   6.922e-01   3.461e-01   3.461e-01  33   40  2.494e-02  2.494e-02  2.494e-02  2.018e-02  2.018e-02  2.018e-02  4.908e-02  2.701e-02  1.250e-01  1.900e-02  3.200e-02 
 OH40R207  0.7465819     4.7  14219.05  -0.23  532  1   1.199e-01   5.996e-02   5.996e-02  33   56  2.223e-02  2.222e-02  2.223e-02  1.762e-02  1.762e-02  1.762e-02  4.657e-02  2.409e-02  1.250e-01  1.700e-02  2.800e-02 
 OH40R210  0.7489643     1.8  15045.87  -0.84  532  1   7.035e-02   3.518e-02   3.518e-02  30   80  1.738e-02  1.737e-02  1.738e-02  1.336e-02  1.336e-02  1.336e-02  4.070e-02  1.875e-02  1.190e-01  1.200e-02  1.400e-02 
 OH40R211  0.7504341    -0.1  15381.06  -1.10  525  1   9.311e-02   4.655e-02   4.655e-02  30   88  1.575e-02  1.574e-02  1.575e-02  1.198e-02  1.198e-02  1.198e-02  3.851e-02  1.692e-02  1.150e-01  1.100e-02  1.200e-02 
 OH40R212  0.7522459    -2.5  15745.21  -1.38  460  1   7.642e-02   3.821e-02   3.821e-02  33   96  1.415e-02  1.415e-02  1.415e-02  1.066e-02  1.066e-02  1.066e-02  3.627e-02  1.511e-02  1.120e-01  9.000e-03  9.000e-03 
 OH40R213  0.7544042    -5.4  16137.77  -1.69  301  1   4.284e-02   2.142e-02   2.142e-02  03  104  1.261e-02  1.261e-02  1.261e-02  9.400e-03  9.316e-03  9.482e-03  3.399e-02  1.334e-02  1.080e-01  8.000e-03  7.000e-03 
 OH40R217  0.7666323   -22.5  17980.37  -3.08  523  2   3.831e-02   2.134e-02   1.697e-02  10  136  7.167e-03  7.165e-03  7.169e-03  5.130e-03  4.723e-03  5.518e-03  2.493e-02  6.996e-03  1.000e+16  1.000e+16  1.000e+16 
 OH41P101  1.0375719     7.9  13287.18   0.02  228  1   5.993e+02   2.996e+02   2.996e+02  33   16  1.263e+00  1.263e+00  1.263e+00  1.069e+00  1.069e+00  1.069e+00  1.747e+00  1.180e+00  3.002e+00  1.143e+00  1.795e+00 
 OH41P102  1.0421218    14.8  13359.12   0.07  217  1   5.569e+02   2.785e+02   2.785e+02  33   24  1.547e+00  1.547e+00  1.547e+00  1.299e+00  1.299e+00  1.299e+00  2.124e+00  1.446e+00  3.599e+00  1.407e+00  2.176e+00 
 OH41P103  1.0471830    22.7  13460.43   0.16    8  1   5.831e+02   2.915e+02   2.915e+02  33   32  1.669e+00  1.669e+00  1.669e+00  1.389e+00  1.389e+00  1.389e+00  2.273e+00  1.561e+00  3.802e+00  1.523e+00  2.325e+00 
 OH41P201  1.0350127     6.6  13415.88   0.06  228  1   1.975e+02   9.874e+01   9.874e+01  33    8  1.989e+00  1.989e+00  1.990e+00  1.684e+00  1.684e+00  1.684e+00  2.767e+00  1.854e+00  4.809e+00  1.853e+00  2.851e+00 
 OH41P202  1.0399387     2.7  13467.30   0.11  228  1   2.316e+02   1.158e+02   1.158e+02  33   16  1.859e+00  1.859e+00  1.860e+00  1.560e+00  1.560e+00  1.560e+00  2.562e+00  1.735e+00  4.387e+00  1.727e+00  2.630e+00 
 OH41P203  1.0453366    -2.9  13552.47   0.12    7  1   2.051e+02   1.026e+02   1.026e+02  33   24  1.834e+00  1.834e+00  1.835e+00  1.526e+00  1.526e+00  1.526e+00  2.505e+00  1.714e+00  4.227e+00  1.701e+00  2.565e+00 
 OH41Q102  1.0298844   -17.6  13359.12   0.07  228  1   2.792e+02   1.396e+02   1.396e+02  33   24  6.833e-01  6.833e-01  6.832e-01  5.462e-01  5.462e-01  5.462e-01  9.656e-01  6.347e-01  1.713e+00  6.260e-01  1.004e+00 
 OH41Q103  1.0312344   -39.7  13460.43   0.16  228  2   9.278e+01   4.668e+01   4.610e+01  33   32  3.591e-01  3.592e-01  3.591e-01  2.784e-01  2.773e-01  2.795e-01  5.074e-01  3.332e-01  9.000e-01  3.300e-01  5.290e-01 
 OH41Q104  1.0330129   -71.4  13591.43   0.30  228  2   2.124e+01   1.126e+01   9.980e+00  30   40  2.164e-01  2.164e-01  2.163e-01  1.626e-01  1.567e-01  1.686e-01  3.056e-01  2.005e-01  5.410e-01  1.990e-01  3.200e-01 
 OH41Q201  1.0287587   -14.8  13415.88   0.06  228  1   6.389e+01   3.194e+01   3.194e+01  30    8  9.656e-01  9.656e-01  9.657e-01  7.961e-01  7.961e-01  7.961e-01  1.363e+00  8.993e-01  2.420e+00  8.820e-01  3.140e-01 
 OH41Q202  1.0295345   -24.7  13467.30   0.11  228  2   1.683e+01   8.267e+00   8.567e+00  30   16  2.139e-01  2.139e-01  2.139e-01  1.710e-01  1.710e-01  1.710e-01  3.018e-01  1.999e-01  5.350e-01  1.950e-01  1.540e-01 
 OH41Q203  1.0308076   -26.8  13552.47   0.12  227  2   7.482e+00   4.238e+00   3.244e+00  30   24  1.046e-01  1.046e-01  1.046e-01  8.108e-02  8.108e-02  8.108e-02  1.474e-01  9.811e-02  2.610e-01  9.500e-02  9.800e-02 
 OH41R102  1.0213849    -4.9  13359.12   0.07  300  1   3.181e+02   1.591e+02   1.591e+02  33   24  7.119e-01  7.120e-01  7.119e-01  6.199e-01  6.199e-01  6.199e-01  1.030e+00  6.617e-01  1.891e+00  6.580e-01  1.083e+00 
 OH41R103  1.0192499    -7.4  13460.43   0.16  300  1   2.500e+02   1.250e+02   1.250e+02  33   32  9.126e-01  9.127e-01  9.125e-01  8.015e-01  8.015e-01  8.015e-01  1.334e+00  8.468e-01  2.486e+00  8.390e-01  1.414e+00 
 OH41R105  1.0161267    -9.9  13752.30   0.47  300  1   4.916e+01   2.458e+01   2.458e+01  33   48  9.805e-01  9.806e-01  9.803e-01  8.761e-01  8.761e-01  8.761e-01  1.467e+00  9.065e-01  2.814e+00  8.950e-01  1.585e+00 
 OH41R106  1.0151785    -9.8  13943.12   0.67  300  1   1.740e+01   8.702e+00   8.702e+00  33   56  9.605e-01  9.606e-01  9.604e-01  8.657e-01  8.657e-01  8.657e-01  1.456e+00  8.861e-01  2.833e+00  8.740e-01  1.590e+00 
 OH41R202  1.0233462    -3.5  13467.30   0.11  301  1   1.073e+02   5.365e+01   5.365e+01  33   16  8.819e-01  8.817e-01  8.820e-01  7.679e-01  7.679e-01  7.679e-01  1.267e+00  8.188e-01  2.298e+00  7.880e-01  1.327e+00 
 OH41R203  1.0205844     0.6  13552.47   0.12  300  1   1.067e+02   5.334e+01   5.334e+01  33   24  1.013e+00  1.013e+00  1.013e+00  8.894e-01  8.894e-01  8.894e-01  1.472e+00  9.389e-01  2.715e+00  9.060e-01  1.554e+00 
 OH41R204  1.0183827     4.3  13670.84   0.09  299  1   5.938e+01   2.969e+01   2.969e+01  33   32  1.035e+00  1.035e+00  1.035e+00  9.168e-01  9.168e-01  9.168e-01  1.523e+00  9.580e-01  2.856e+00  9.270e-01  1.623e+00 
 OH41R205  1.0167162     7.2  13821.76   0.02  300  1   2.468e+01   1.234e+01   1.234e+01  33   40  1.020e+00  1.020e+00  1.020e+00  9.112e-01  9.112e-01  9.112e-01  1.520e+00  9.423e-01  2.899e+00  9.140e-01  1.637e+00 
 OH50P101  0.6204436     3.2  16201.32   0.02  231  1   1.624e+00   8.118e-01   8.118e-01  33   16  4.206e-03  4.206e-03  4.206e-03  4.412e-03  4.412e-03  4.412e-03  8.311e-03  5.378e-03  2.100e-02  5.000e-03  2.000e-02 
 OH50P102  0.6223492     6.1  16270.30   0.07  231  1   1.876e+00   9.381e-01   9.381e-01  33   24  5.265e-03  5.265e-03  5.266e-03  5.632e-03  5.632e-03  5.632e-03  1.016e-02  6.714e-03  2.500e-02  6.000e-03  2.300e-02 
 OH50P103  0.6245370     9.6  16367.38   0.15  231  1   1.324e+00   6.619e-01   6.619e-01  33   32  5.796e-03  5.795e-03  5.796e-03  6.321e-03  6.321e-03  6.321e-03  1.095e-02  7.381e-03  2.700e-02  7.000e-03  2.500e-02 
 OH50P104  0.6270139    13.6  16492.82   0.27  231  1   7.014e-01   3.507e-01   3.507e-01  33   40  6.164e-03  6.164e-03  6.164e-03  6.855e-03  6.889e-03  6.821e-03  1.142e-02  7.851e-03  2.700e-02  7.000e-03  2.500e-02 
 OH50P105  0.6297848    17.8  16646.80   0.43  231  2   2.715e-01   1.166e-01   1.550e-01  33   48  6.462e-03  6.462e-03  6.462e-03  7.328e-03  7.490e-03  7.164e-03  1.176e-02  8.243e-03  2.700e-02  7.000e-03  2.500e-02 
 OH50P106  0.6328540    22.4  16829.37   0.62  231  2   1.115e-01   5.029e-02   6.117e-02  30   56  6.719e-03  6.719e-03  6.718e-03  7.768e-03  8.075e-03  7.459e-03  1.204e-02  8.593e-03  2.700e-02  7.000e-03  2.400e-02 
 OH50P108  0.6399063    32.7  17279.99   1.10  231  2   3.356e-02   2.155e-02   1.201e-02  03   72  7.150e-03  7.151e-03  7.149e-03  8.595e-03  9.227e-03  7.952e-03  1.248e-02  9.213e-03  2.700e-02  8.000e-03  2.200e-02 
 OH50P109  0.6439013    38.4  17547.68   1.37  231  2   4.801e-02   2.955e-02   1.846e-02  30   80  7.331e-03  7.333e-03  7.330e-03  8.986e-03  9.799e-03  8.156e-03  1.265e-02  9.490e-03  2.700e-02  8.000e-03  2.200e-02 
 OH50P111  0.6528655    51.2  18166.37   2.00  231  2   5.006e-02   2.537e-02   2.469e-02  03   96  7.636e-03  7.638e-03  7.635e-03  9.731e-03  1.093e-02  8.490e-03  1.296e-02  9.975e-03  2.600e-02  8.000e-03  1.800e-02 
 OH50P112  0.6578525    58.3  18516.62   2.34  231  2   1.093e+00   3.655e-02   1.057e+00  10  104  7.762e-03  7.764e-03  7.760e-03  1.009e-02  1.150e-02  8.623e-03  1.308e-02  1.018e-02  2.600e-02  8.000e-03  1.600e-02 
 OH50P113  0.6631900    66.0  18893.55   2.71  231  2   5.034e-02   2.856e-02   2.178e-02  30  112  7.873e-03  7.875e-03  7.870e-03  1.043e-02  1.206e-02  8.734e-03  1.319e-02  1.036e-02  2.600e-02  8.000e-03  1.400e-02 
 OH50P115  0.6749646    82.9  19725.43   3.47  532  2   4.373e-02   3.262e-02   1.112e-02  03  128  8.058e-03  8.061e-03  8.055e-03  1.110e-02  1.318e-02  8.907e-03  1.334e-02  1.064e-02  1.000e+16  7.000e-03  1.000e-02 
 OH50P116  0.6814292    92.4  20179.26   3.87  532  2   5.977e-02   3.322e-02   2.655e-02  30  136  8.140e-03  8.143e-03  8.137e-03  1.143e-02  1.375e-02  8.975e-03  1.340e-02  1.074e-02  1.000e+16  1.000e+16  1.000e+16 
 OH50P118  0.6955930   113.3  21159.58   4.70  532  2   6.860e-02   3.757e-02   3.104e-02  01  152  8.304e-03  8.308e-03  8.300e-03  1.213e-02  1.494e-02  9.099e-03  1.347e-02  1.087e-02  1.000e+16  1.000e+16  1.000e+16 
 OH50P120  0.7115292   137.3  22232.26   5.55  532  2   1.059e-01   8.775e-02   1.810e-02  03  168  8.508e-03  8.513e-03  8.504e-03  1.292e-02  1.629e-02  9.251e-03  1.350e-02  1.092e-02  1.000e+16  1.000e+16  1.000e+16 
 OH50P201  0.6194651     2.7  16330.58   0.06  231  1   4.395e-01   2.198e-01   2.198e-01  33    8  6.522e-03  6.521e-03  6.523e-03  6.842e-03  6.842e-03  6.842e-03  1.312e-02  8.364e-03  3.400e-02  8.000e-03  3.100e-02 
 OH50P202  0.6214778     1.3  16379.59   0.10  231  1   6.404e-01   3.202e-01   3.202e-01  33   16  6.256e-03  6.255e-03  6.257e-03  6.692e-03  6.692e-03  6.692e-03  1.223e-02  7.987e-03  3.100e-02  7.000e-03  2.800e-02 
 OH50P204  0.6263489    -3.6  16573.74   0.09  231  1   3.250e-01   1.625e-01   1.625e-01  33   32  6.474e-03  6.473e-03  6.475e-03  7.200e-03  7.200e-03  7.200e-03  1.207e-02  8.246e-03  2.900e-02  7.000e-03  2.600e-02 
 OH50P209  0.6435332   -22.6  17594.66  -0.56  231  2   4.316e-02   2.389e-02   1.928e-02  30   72  7.394e-03  7.393e-03  7.395e-03  9.063e-03  8.231e-03  9.889e-03  1.279e-02  9.568e-03  2.700e-02  8.000e-03  2.200e-02 
 OH50P210  0.6478826   -27.4  17886.58  -0.78  231  2   4.572e-02   2.056e-02   2.516e-02  02   80  7.544e-03  7.544e-03  7.546e-03  9.429e-03  8.399e-03  1.045e-02  1.292e-02  9.808e-03  2.700e-02  8.000e-03  2.000e-02 
 OH50P211  0.6525571   -32.6  18206.60  -1.02  231  2   4.159e-02   1.721e-02   2.438e-02  01   88  7.679e-03  7.678e-03  7.680e-03  9.786e-03  8.546e-03  1.101e-02  1.304e-02  1.003e-02  2.700e-02  8.000e-03  1.800e-02 
 OH50P213  0.6629241   -44.4  18928.87  -1.57  231  2   3.661e-02   9.476e-03   2.714e-02  02  104  7.904e-03  7.902e-03  7.905e-03  1.047e-02  8.781e-03  1.212e-02  1.324e-02  1.040e-02  2.600e-02  8.000e-03  1.400e-02 
 OH50P214  0.6686404   -51.0  19330.02  -1.87  231  2   3.076e-02   9.787e-03   2.097e-02  20  112  7.997e-03  7.996e-03  7.999e-03  1.080e-02  8.872e-03  1.268e-02  1.333e-02  1.055e-02  2.500e-02  7.000e-03  1.200e-02 
 OH50P216  0.6812065   -65.8  20209.37  -2.52  532  2   4.513e-02   1.577e-02   2.936e-02  30  128  8.161e-03  8.159e-03  8.163e-03  1.146e-02  9.017e-03  1.381e-02  1.344e-02  1.077e-02  1.000e+16  7.000e-03  8.000e-03 
 OH50P218  0.6953900   -82.9  21187.18  -3.22  532  2   5.533e-02   3.745e-02   1.788e-02  10  144  8.320e-03  8.318e-03  8.323e-03  1.215e-02  9.141e-03  1.501e-02  1.351e-02  1.089e-02  1.000e+16  1.000e+16  1.000e+16 
 OH50Q101  0.6172346    -1.7  16201.32   0.02  231  1   1.764e+00   8.818e-01   8.818e-01  33   16  5.238e-03  5.238e-03  5.237e-03  5.166e-03  5.166e-03  5.166e-03  1.111e-02  6.813e-03  3.000e-02  6.000e-03  2.700e-02 
 OH50Q102  0.6177995    -6.4  16270.30   0.07  231  1   5.630e-01   2.815e-01   2.815e-01  33   24  2.130e-03  2.131e-03  2.130e-03  1.744e-03  1.744e-03  1.744e-03  4.532e-03  2.778e-03  1.200e-02  2.000e-03  1.100e-02 
 OH50Q201  0.6171235    -5.3  16330.58   0.06  231  1   1.450e-01   7.252e-02   7.252e-02  30    8  3.023e-03  3.023e-03  3.023e-03  2.981e-03  2.981e-03  2.981e-03  6.400e-03  3.931e-03  1.700e-02  4.000e-03  1.600e-02 
 OH50Q202  0.6175902    -8.9  16379.59   0.10  231  1   5.212e-02   2.606e-02   2.606e-02  30   16  6.688e-04  6.688e-04  6.687e-04  5.475e-04  5.475e-04  5.475e-04  1.416e-03  8.752e-04  4.000e-03  1.000e-03  3.000e-03 
 OH50R102  0.6146177    -1.4  16270.30   0.07  231  1   6.504e-01   3.252e-01   3.252e-01  33   24  2.056e-03  2.056e-03  2.055e-03  2.009e-03  2.009e-03  2.009e-03  4.747e-03  2.750e-03  1.400e-02  2.000e-03  1.200e-02 
 OH50R103  0.6141165    -1.9  16367.38   0.15  231  1   5.041e-01   2.521e-01   2.521e-01  33   32  2.529e-03  2.529e-03  2.528e-03  2.423e-03  2.423e-03  2.423e-03  6.096e-03  3.441e-03  1.900e-02  3.000e-03  1.500e-02 
 OH50R104  0.6138484    -1.8  16492.82   0.27  231  1   2.490e-01   1.245e-01   1.245e-01  33   40  2.576e-03  2.576e-03  2.575e-03  2.421e-03  2.421e-03  2.421e-03  6.518e-03  3.578e-03  2.100e-02  3.000e-03  1.600e-02 
 OH50R202  0.6152628    -0.9  16379.59   0.10  231  1   2.410e-01   1.205e-01   1.205e-01  33   16  2.611e-03  2.610e-03  2.611e-03  2.551e-03  2.551e-03  2.551e-03  5.874e-03  3.456e-03  1.700e-02  3.000e-03  1.400e-02 
 OH50R203  0.6145075     0.6  16460.82   0.11  231  1   2.012e-01   1.006e-01   1.006e-01  33   24  2.869e-03  2.869e-03  2.870e-03  2.749e-03  2.749e-03  2.749e-03  6.761e-03  3.865e-03  2.000e-02  3.000e-03  1.700e-02 
 OH51P101  0.7966841     4.8  16201.32   0.02  532  1   6.162e+01   3.081e+01   3.081e+01  33   16  1.707e-01  1.707e-01  1.707e-01  1.475e-01  1.475e-01  1.475e-01  2.649e-01  1.622e-01  5.440e-01  1.450e-01  1.620e-01 
 OH51P102  0.7995531     9.1  16270.30   0.07  532  1   6.811e+01   3.406e+01   3.406e+01  33   24  2.104e-01  2.104e-01  2.104e-01  1.832e-01  1.832e-01  1.832e-01  3.220e-01  2.001e-01  6.500e-01  1.800e-01  1.990e-01 
 OH51P103  0.8028018    14.3  16367.38   0.15  532  1   4.820e+01   2.410e+01   2.410e+01  33   32  2.284e-01  2.284e-01  2.284e-01  2.004e-01  2.004e-01  2.004e-01  3.449e-01  2.174e-01  6.840e-01  1.960e-01  2.140e-01 
 OH51P104  0.8064396    20.0  16492.82   0.27  532  2   2.549e+01   1.291e+01   1.257e+01  33   40  2.401e-01  2.401e-01  2.401e-01  2.122e-01  2.132e-01  2.112e-01  3.577e-01  2.286e-01  6.970e-01  2.070e-01  2.230e-01 
 OH51P105  0.8104729    26.1  16646.80   0.43  531  2   1.093e+01   5.556e+00   5.378e+00  33   48  2.491e-01  2.491e-01  2.491e-01  2.219e-01  2.268e-01  2.169e-01  3.665e-01  2.372e-01  7.010e-01  2.160e-01  2.300e-01 
 OH51P106  0.8149076    32.7  16829.37   0.62  532  2   4.783e+00   2.771e+00   2.012e+00  30   56  2.568e-01  2.569e-01  2.568e-01  2.305e-01  2.396e-01  2.213e-01  3.731e-01  2.445e-01  7.020e-01  2.230e-01  2.360e-01 
 OH51P107  0.8197501    39.8  17040.48   0.84  532  2   2.076e+00   1.092e+00   9.841e-01  33   64  2.637e-01  2.638e-01  2.637e-01  2.385e-01  2.519e-01  2.248e-01  3.785e-01  2.509e-01  6.990e-01  2.290e-01  2.410e-01 
 OH51P108  0.8250081    47.4  17279.99   1.10  532  2   1.466e+00   8.167e-01   6.491e-01  33   72  2.700e-01  2.700e-01  2.700e-01  2.460e-01  2.641e-01  2.276e-01  3.829e-01  2.566e-01  6.950e-01  2.340e-01  2.460e-01 
 OH51P109  0.8306909    55.5  17547.68   1.37  532  2   1.317e+00   7.592e-01   5.578e-01  13   80  2.757e-01  2.758e-01  2.757e-01  2.531e-01  2.760e-01  2.297e-01  3.867e-01  2.617e-01  6.900e-01  2.390e-01  2.520e-01 
 OH51P110  0.8368092    64.2  17843.26   1.68  532  2   1.316e+00   5.793e-01   7.370e-01  22   88  2.810e-01  2.811e-01  2.810e-01  2.599e-01  2.878e-01  2.314e-01  3.898e-01  2.663e-01  6.830e-01  2.440e-01  2.560e-01 
 OH51P111  0.8433750    73.6  18166.37   2.00  532  2   1.787e+00   1.043e+00   7.437e-01  32   96  2.858e-01  2.859e-01  2.858e-01  2.664e-01  2.993e-01  2.324e-01  3.924e-01  2.702e-01  6.760e-01  2.470e-01  2.590e-01 
 OH51P113  0.8579068    94.4  18893.55   2.71  230  2   1.619e+00   9.534e-01   6.658e-01  33  112  2.941e-01  2.941e-01  2.940e-01  2.782e-01  3.216e-01  2.330e-01  3.957e-01  2.764e-01  6.590e-01  2.530e-01  2.650e-01 
 OH51P114  0.8659055   105.9  19296.67   3.08  230  2   1.161e+00   5.989e-01   5.621e-01  22  120  2.974e-01  2.975e-01  2.973e-01  2.836e-01  3.323e-01  2.325e-01  3.968e-01  2.786e-01  6.490e-01  2.550e-01  2.670e-01 
 OH51P115  0.8744177   118.3  19725.43   3.47  529  2   1.348e+00   8.295e-01   5.189e-01  33  128  3.003e-01  3.004e-01  3.002e-01  2.885e-01  3.426e-01  2.315e-01  3.974e-01  2.802e-01  1.000e+16  2.560e-01  2.690e-01 
 OH51P117  0.8930696   145.8  20657.53   4.29  529  2   1.699e+00   1.083e+00   6.164e-01  13  144  3.044e-01  3.046e-01  3.043e-01  2.969e-01  3.615e-01  2.279e-01  3.972e-01  2.815e-01  1.000e+16  1.000e+16  1.000e+16 
 OH51P118  0.9032588   161.0  21159.58   4.70  528  2   1.808e+00   1.222e+00   5.865e-01  22  152  3.056e-01  3.058e-01  3.055e-01  3.003e-01  3.701e-01  2.254e-01  3.965e-01  2.812e-01  1.000e+16  1.000e+16  1.000e+16 
 OH51P119  0.9140607   177.4  21684.74   5.12  528  2   1.049e+00   6.635e-01   3.851e-01  30  160  3.062e-01  3.064e-01  3.061e-01  3.032e-01  3.780e-01  2.223e-01  3.956e-01  2.803e-01  1.000e+16  1.000e+16  1.000e+16 
 OH51P120  0.9255068   194.9  22232.26   5.55  529  2   8.767e-01   5.373e-01   3.394e-01  33  168  3.062e-01  3.064e-01  3.060e-01  3.055e-01  3.852e-01  2.188e-01  3.942e-01  2.788e-01  1.000e+16  1.000e+16  1.000e+16 
 OH51P122  0.9504756   233.8  23391.36   6.39  299  2   1.147e+00   8.820e-01   2.653e-01  03  184  3.043e-01  3.045e-01  3.041e-01  3.082e-01  3.970e-01  2.104e-01  3.907e-01  2.743e-01  1.000e+16  1.000e+16  1.000e+16 
 OH51P123  0.9640795   255.4  24001.31   6.81  299  2   1.102e+00   5.278e-01   5.741e-01  03  192  3.024e-01  3.027e-01  3.022e-01  3.086e-01  4.016e-01  2.055e-01  1.000e+16  2.714e-01  1.000e+16  1.000e+16  1.000e+16 
 OH51P201  0.7951391     4.1  16330.58   0.06  531  1   1.807e+01   9.034e+00   9.034e+00  33    8  2.682e-01  2.682e-01  2.683e-01  2.318e-01  2.318e-01  2.318e-01  4.200e-01  2.543e-01  8.760e-01  2.350e-01  2.570e-01 
 OH51P202  0.7981964     2.0  16379.59   0.10  532  1   2.376e+01   1.188e+01   1.188e+01  33   16  2.523e-01  2.523e-01  2.524e-01  2.197e-01  2.197e-01  2.197e-01  3.888e-01  2.396e-01  7.940e-01  2.210e-01  2.390e-01 
 OH51P203  0.8016264    -1.4  16460.82   0.11  530  1   1.959e+01   9.794e+00   9.794e+00  33   24  2.506e-01  2.505e-01  2.506e-01  2.198e-01  2.198e-01  2.198e-01  3.803e-01  2.382e-01  7.610e-01  2.190e-01  2.360e-01 
 OH51P204  0.8054236    -5.5  16573.74   0.09  532  1   1.176e+01   5.881e+00   5.881e+00  33   32  2.533e-01  2.533e-01  2.533e-01  2.239e-01  2.239e-01  2.239e-01  3.789e-01  2.410e-01  7.430e-01  2.220e-01  2.360e-01 
 OH51P205  0.8095906   -10.1  16717.78   0.03  532  1   5.681e+00   2.841e+00   2.841e+00  33   40  2.577e-01  2.577e-01  2.578e-01  2.295e-01  2.295e-01  2.295e-01  3.802e-01  2.452e-01  7.320e-01  2.250e-01  2.390e-01 
 OH51P206  0.8141352   -15.2  16892.41  -0.07  532  1   2.473e+00   1.237e+00   1.237e+00  33   48  2.628e-01  2.628e-01  2.628e-01  2.358e-01  2.265e-01  2.452e-01  3.826e-01  2.501e-01  7.230e-01  2.300e-01  2.420e-01 
 OH51P207  0.8190674   -20.7  17097.09  -0.20  532  2   1.716e+00   6.759e-01   1.041e+00  13   56  2.681e-01  2.680e-01  2.681e-01  2.424e-01  2.286e-01  2.562e-01  3.853e-01  2.550e-01  7.140e-01  2.340e-01  2.460e-01 
 OH51P208  0.8243988   -26.6  17331.33  -0.37  532  2   1.060e+00   4.773e-01   5.826e-01  33   64  2.733e-01  2.733e-01  2.733e-01  2.490e-01  2.305e-01  2.674e-01  3.881e-01  2.597e-01  7.070e-01  2.390e-01  2.490e-01 
 OH51P209  0.8301419   -33.0  17594.66  -0.56  531  2   6.056e+01   4.489e-01   6.011e+01  10   72  2.784e-01  2.783e-01  2.784e-01  2.555e-01  2.321e-01  2.788e-01  3.907e-01  2.642e-01  6.980e-01  2.430e-01  2.530e-01 
 OH51P211  0.8429175   -47.4  18206.60  -1.02  531  2   1.908e+00   1.181e+00   7.263e-01  22   88  2.876e-01  2.875e-01  2.876e-01  2.680e-01  2.341e-01  3.014e-01  3.950e-01  2.719e-01  6.810e-01  2.500e-01  2.610e-01 
 OH51P212  0.8499798   -55.4  18554.21  -1.28  532  2   1.247e+00   4.955e-01   7.518e-01  33   96  2.917e-01  2.916e-01  2.917e-01  2.739e-01  2.344e-01  3.126e-01  3.964e-01  2.750e-01  6.720e-01  2.530e-01  2.640e-01 
 OH51P213  0.8575137   -64.1  18928.87  -1.57  230  2   1.249e+00   5.110e-01   7.379e-01  32  104  2.953e-01  2.952e-01  2.954e-01  2.794e-01  2.343e-01  3.235e-01  3.976e-01  2.776e-01  6.620e-01  2.550e-01  2.660e-01 
 OH51P214  0.8655375   -73.4  19330.02  -1.87  230  2   1.060e+00   3.779e-01   6.818e-01  33  112  2.985e-01  2.985e-01  2.986e-01  2.846e-01  2.337e-01  3.341e-01  3.985e-01  2.797e-01  6.510e-01  2.560e-01  2.680e-01 
 OH51P215  0.8740711   -83.4  19757.06  -2.19  530  2   1.089e+00   4.462e-01   6.430e-01  33  120  3.013e-01  3.012e-01  3.014e-01  2.894e-01  2.327e-01  3.443e-01  3.988e-01  2.811e-01  6.410e-01  2.580e-01  2.700e-01 
 OH51P216  0.8831363   -94.2  20209.37  -2.52  529  2   1.187e+00   4.605e-01   7.268e-01  33  128  3.035e-01  3.034e-01  3.036e-01  2.938e-01  2.311e-01  3.541e-01  3.988e-01  2.820e-01  1.000e+16  2.580e-01  2.710e-01 
 OH51P217  0.8927571  -105.8  20686.30  -2.87  529  2   1.283e+00   4.949e-01   7.882e-01  33  136  3.052e-01  3.051e-01  3.053e-01  2.976e-01  2.290e-01  3.633e-01  3.983e-01  2.822e-01  1.000e+16  1.000e+16  1.000e+16 
 OH51P219  0.9137731  -131.6  21711.28  -3.58  528  2   2.990e+00   2.324e+00   6.660e-01  22  152  3.069e-01  3.067e-01  3.070e-01  3.038e-01  2.234e-01  3.799e-01  3.964e-01  2.809e-01  1.000e+16  1.000e+16  1.000e+16 
 OH51P220  0.9252291  -145.9  22257.86  -3.95  529  2   2.456e+00   2.043e+00   4.127e-01  22  160  3.068e-01  3.066e-01  3.069e-01  3.060e-01  2.199e-01  3.871e-01  3.950e-01  2.794e-01  1.000e+16  1.000e+16  1.000e+16 
 OH51P221  0.9373628  -161.3  22826.15  -4.32  530  2   1.171e+01   1.870e-01   1.152e+01  01  168  3.061e-01  3.059e-01  3.062e-01  3.076e-01  2.159e-01  3.936e-01  3.932e-01  2.773e-01  1.000e+16  1.000e+16  1.000e+16 
 OH51P222  0.9502129  -177.8  23415.34  -4.69  299  2   8.614e-01   3.185e-01   5.429e-01  03  176  3.048e-01  3.046e-01  3.049e-01  3.087e-01  2.115e-01  3.991e-01  3.914e-01  2.748e-01  1.000e+16  1.000e+16  1.000e+16 
 OH51P223  0.9638223  -195.5  24024.61  -5.06  299  2   5.459e-01   8.917e-02   4.568e-01  02  184  3.029e-01  3.027e-01  3.030e-01  3.091e-01  2.067e-01  4.039e-01  3.893e-01  2.719e-01  1.000e+16  1.000e+16  1.000e+16 
 OH51Q101  0.7915884    -2.7  16201.32   0.02  532  1   7.665e+01   3.832e+01   3.832e+01  33   16  2.237e-01  2.237e-01  2.237e-01  1.844e-01  1.844e-01  1.844e-01  3.596e-01  2.114e-01  7.730e-01  1.910e-01  2.180e-01 
 OH51Q103  0.7933950   -22.6  16367.38   0.15  532  2   1.061e+01   3.959e+00   6.650e+00  11   32  4.815e-02  4.816e-02  4.813e-02  3.120e-02  3.108e-02  3.133e-02  7.733e-02  4.534e-02  1.660e-01  4.100e-02  4.700e-02 
 OH51Q104  0.7947977   -40.7  16492.82   0.27  532  2   2.273e+00   1.155e+00   1.118e+00  13   40  2.909e-02  2.910e-02  2.907e-02  1.671e-02  1.610e-02  1.733e-02  4.666e-02  2.734e-02  1.000e-01  2.500e-02  2.900e-02 
 OH51Q105  0.7965485   -64.1  16646.80   0.43  532  2   4.897e-01   2.307e-01   2.590e-01  33   48  1.920e-02  1.921e-02  1.919e-02  9.779e-03  9.104e-03  1.046e-02  3.074e-02  1.802e-02  6.600e-02  1.700e-02  1.900e-02 
 OH51Q106  0.7986554   -92.5  16829.37   0.62  532  2   2.041e-01   1.442e-01   5.990e-02  22   56  1.349e-02  1.350e-02  1.349e-02  6.094e-03  5.478e-03  6.717e-03  2.157e-02  1.265e-02  4.600e-02  1.200e-02  1.300e-02 
 OH51Q201  0.7914428    -8.5  16330.58   0.06  532  1   8.352e+00   4.176e+00   4.176e+00  33    8  1.288e-01  1.288e-01  1.288e-01  1.062e-01  1.062e-01  1.062e-01  2.068e-01  1.218e-01  4.450e-01  1.100e-01  1.250e-01 
 OH51Q202  0.7920528   -14.3  16379.59   0.10  532  1   3.226e+00   1.613e+00   1.613e+00  30   16  2.846e-02  2.846e-02  2.846e-02  2.080e-02  2.080e-02  2.080e-02  4.564e-02  2.700e-02  9.800e-02  2.400e-02  2.800e-02 
 OH51Q203  0.7930545   -15.5  16460.82   0.11  532  1   1.280e+00   6.400e-01   6.400e-01  30   24  1.390e-02  1.390e-02  1.389e-02  9.006e-03  9.006e-03  9.006e-03  2.223e-02  1.322e-02  4.800e-02  1.200e-02  1.400e-02 
 OH51Q205  0.7961864    -2.1  16717.78   0.03  532  1   3.783e-02   1.891e-02   1.891e-02  30   40  6.366e-03  6.372e-03  6.361e-03  3.243e-03  3.243e-03  3.243e-03  1.012e-02  6.060e-03  2.100e-02  5.000e-03  6.000e-03 
 OH51Q206  0.7983048    12.6  16892.41  -0.07  532  1   4.443e-02   2.222e-02   2.222e-02  03   48  4.917e-03  4.924e-03  4.911e-03  2.221e-03  2.221e-03  2.221e-03  7.784e-03  4.674e-03  1.600e-02  4.000e-03  5.000e-03 
 OH51R102  0.7872895    -2.5  16270.30   0.07  532  1   2.912e+01   1.456e+01   1.456e+01  33   24  9.332e-02  9.332e-02  9.331e-02  7.832e-02  7.832e-02  7.832e-02  1.560e-01  8.791e-02  3.520e-01  8.000e-02  9.300e-02 
 OH51R103  0.7862820    -3.5  16367.38   0.15  532  1   2.346e+01   1.173e+01   1.173e+01  33   32  1.187e-01  1.188e-01  1.187e-01  9.891e-02  9.891e-02  9.891e-02  2.020e-01  1.115e-01  4.650e-01  1.010e-01  1.210e-01 
 OH51R105  0.7851885    -3.6  16646.80   0.43  532  1   5.007e+00   2.504e+00   2.504e+00  33   48  1.256e-01  1.256e-01  1.256e-01  1.031e-01  1.031e-01  1.031e-01  2.221e-01  1.170e-01  5.340e-01  1.050e-01  1.320e-01 
 OH51R106  0.7851307    -2.6  16829.37   0.62  532  1   1.821e+00   9.105e-01   9.105e-01  33   56  1.220e-01  1.221e-01  1.220e-01  9.938e-02  9.938e-02  9.938e-02  2.204e-01  1.131e-01  5.410e-01  1.010e-01  1.310e-01 
 OH51R113  0.7946408    20.8  18893.55   2.71  532  2   3.473e-01   1.694e-01   1.779e-01  33  112  7.373e-02  7.375e-02  7.372e-02  5.695e-02  5.744e-02  5.644e-02  1.619e-01  6.375e-02  4.670e-01  5.300e-02  9.800e-02 
 OH51R114  0.7974998    26.6  19296.67   3.08  532  2   2.005e-01   1.210e-01   7.947e-02  13  120  6.645e-02  6.646e-02  6.643e-02  5.093e-02  5.223e-02  4.958e-02  1.517e-01  5.640e-02  4.490e-01  4.700e-02  9.200e-02 
 OH51R115  0.8007587    33.0  19725.43   3.47  529  2   2.259e-01   1.101e-01   1.158e-01  13  128  5.933e-02  5.935e-02  5.931e-02  4.514e-02  4.704e-02  4.314e-02  1.414e-01  4.927e-02  1.000e+16  4.000e-02  8.700e-02 
 OH51R116  0.8044281    40.2  20179.26   3.87  532  2   2.494e-01   1.005e-01   1.488e-01  30  136  5.243e-02  5.244e-02  5.241e-02  3.959e-02  4.190e-02  3.713e-02  1.312e-01  4.241e-02  1.000e+16  1.000e+16  1.000e+16 
 OH51R117  0.8085200    48.0  20657.53   4.29  532  2   1.714e-01   8.056e-02   9.080e-02  10  144  4.577e-02  4.579e-02  4.576e-02  3.430e-02  3.687e-02  3.156e-02  1.211e-01  3.588e-02  1.000e+16  1.000e+16  1.000e+16 
 OH51R118  0.8130477    56.7  21159.58   4.70  532  2   4.216e-01   3.632e-01   5.831e-02  22  152  3.941e-02  3.942e-02  3.939e-02  2.931e-02  3.198e-02  2.644e-02  1.111e-01  2.974e-02  1.000e+16  1.000e+16  1.000e+16 
 OH51R202  0.7883850    -1.7  16379.59   0.10  532  1   1.113e+01   5.565e+00   5.565e+00  33   16  1.164e-01  1.163e-01  1.164e-01  9.767e-02  9.767e-02  9.767e-02  1.922e-01  1.096e-01  4.270e-01  9.600e-02  1.160e-01 
 OH51R203  0.7869895     0.7  16460.82   0.11  532  1   1.012e+01   5.060e+00   5.060e+00  33   24  1.325e-01  1.325e-01  1.325e-01  1.104e-01  1.104e-01  1.104e-01  2.233e-01  1.244e-01  5.080e-01  1.090e-01  1.340e-01 
 OH51R206  0.7852687     4.7  16892.41  -0.07  532  1   1.112e+00   5.558e-01   5.558e-01  33   48  1.258e-01  1.258e-01  1.259e-01  1.025e-01  1.025e-01  1.025e-01  2.259e-01  1.167e-01  5.520e-01  1.020e-01  1.340e-01 
 OH51R213  0.7945446    -7.4  18928.87  -1.57  532  1   2.315e-01   1.157e-01   1.157e-01  30  104  7.436e-02  7.435e-02  7.437e-02  5.743e-02  5.692e-02  5.794e-02  1.629e-01  6.435e-02  4.720e-01  5.300e-02  9.900e-02 
 OH51R214  0.7973980   -11.4  19330.02  -1.87  532  1   1.855e-01   9.276e-02   9.276e-02  30  112  6.697e-02  6.695e-02  6.698e-02  5.133e-02  4.998e-02  5.265e-02  1.525e-01  5.690e-02  4.530e-01  4.700e-02  9.300e-02 
 OH51R215  0.8006529   -16.0  19757.06  -2.19  532  1   2.295e-01   1.147e-01   1.147e-01  33  120  5.977e-02  5.976e-02  5.978e-02  4.547e-02  4.347e-02  4.740e-02  1.421e-01  4.969e-02  4.330e-01  4.000e-02  8.700e-02 
 OH51R216  0.8043197   -21.2  20209.37  -2.52  532  2   4.111e-01   1.075e-01   3.036e-01  11  128  5.280e-02  5.279e-02  5.281e-02  3.987e-02  3.741e-02  4.223e-02  1.319e-01  4.277e-02  1.000e+16  3.400e-02  8.200e-02 
 OH51R218  0.8129362   -33.6  21187.18  -3.22  532  2   3.245e-01   2.912e-01   3.330e-02  02  144  3.968e-02  3.967e-02  3.969e-02  2.951e-02  2.665e-02  3.223e-02  1.116e-01  3.000e-02  1.000e+16  1.000e+16  1.000e+16 
 OH61P101  0.6534848     3.3  18951.87   0.02  231  1   6.300e+00   3.150e+00   3.150e+00  33   16  2.414e-02  2.414e-02  2.414e-02  2.592e-02  2.592e-02  2.592e-02  4.677e-02  2.678e-02  1.130e-01  2.400e-02  2.300e-02 
 OH61P102  0.6555427     6.4  19017.85   0.06  231  1   7.313e+00   3.656e+00   3.656e+00  33   24  3.017e-02  3.016e-02  3.017e-02  3.295e-02  3.295e-02  3.295e-02  5.706e-02  3.345e-02  1.340e-01  3.000e-02  2.800e-02 
 OH61P103  0.6579102    10.2  19110.65   0.14  231  1   5.548e+00   2.774e+00   2.774e+00  33   32  3.320e-02  3.320e-02  3.320e-02  3.689e-02  3.689e-02  3.689e-02  6.134e-02  3.681e-02  1.410e-01  3.300e-02  3.100e-02 
 OH61P104  0.6605960    14.5  19230.48   0.25  231  1   3.033e+00   1.516e+00   1.516e+00  33   40  3.536e-02  3.536e-02  3.536e-02  3.998e-02  4.017e-02  3.978e-02  6.386e-02  3.921e-02  1.440e-01  3.500e-02  3.200e-02 
 OH61P105  0.6636064    19.2  19377.50   0.39  231  2   1.402e+00   7.268e-01   6.757e-01  33   48  3.718e-02  3.718e-02  3.718e-02  4.277e-02  4.372e-02  4.181e-02  6.566e-02  4.125e-02  1.440e-01  3.700e-02  3.300e-02 
 OH61P106  0.6669471    24.3  19551.73   0.57  231  2   5.871e-01   3.110e-01   2.761e-01  33   56  3.884e-02  3.884e-02  3.884e-02  4.545e-02  4.724e-02  4.364e-02  6.708e-02  4.311e-02  1.440e-01  3.900e-02  3.400e-02 
 OH61P107  0.6706240    29.8  19753.13   0.77  496  2   3.410e-01   1.942e-01   1.468e-01  33   64  4.041e-02  4.041e-02  4.041e-02  4.811e-02  5.083e-02  4.535e-02  6.830e-02  4.488e-02  1.440e-01  4.100e-02  3.500e-02 
 OH61P109  0.6790152    42.2  20236.72   1.26  532  2   2.419e-01   1.345e-01   1.074e-01  33   80  4.341e-02  4.341e-02  4.340e-02  5.348e-02  5.833e-02  4.855e-02  7.026e-02  4.822e-02  1.420e-01  4.400e-02  3.600e-02 
 OH61P110  0.6837466    49.2  20518.40   1.54  532  2   2.431e-01   1.399e-01   1.033e-01  13   88  4.487e-02  4.488e-02  4.486e-02  5.625e-02  6.228e-02  5.007e-02  7.107e-02  4.981e-02  1.410e-01  4.500e-02  3.600e-02 
 OH61P111  0.6888486    56.7  20826.23   1.84  532  2   2.612e-01   1.497e-01   1.115e-01  30   96  4.632e-02  4.633e-02  4.631e-02  5.908e-02  6.639e-02  5.155e-02  7.178e-02  5.135e-02  1.400e-01  4.700e-02  3.600e-02 
 OH61P112  0.6943331    64.8  21159.79   2.16  532  2   2.575e-01   1.574e-01   1.002e-01  30  104  4.778e-02  4.779e-02  4.776e-02  6.199e-02  7.068e-02  5.301e-02  7.239e-02  5.282e-02  1.380e-01  4.800e-02  3.600e-02 
 OH61P113  0.7002133    73.5  21518.63   2.49  532  2   2.617e-01   1.523e-01   1.094e-01  10  112  4.923e-02  4.924e-02  4.922e-02  6.498e-02  7.514e-02  5.443e-02  7.292e-02  5.422e-02  1.370e-01  4.900e-02  3.600e-02 
 OH61P114  0.7065041    82.9  21902.26   2.83  532  2   2.002e-01   1.284e-01   7.176e-02  11  120  5.069e-02  5.071e-02  5.068e-02  6.807e-02  7.980e-02  5.583e-02  7.338e-02  5.553e-02  1.350e-01  5.000e-02  3.700e-02 
 OH61P115  0.7132218    93.0  22310.13   3.19  532  2   1.984e-01   1.189e-01   7.951e-02  13  128  5.216e-02  5.218e-02  5.214e-02  7.126e-02  8.466e-02  5.721e-02  7.375e-02  5.673e-02  1.000e+16  5.100e-02  3.700e-02 
 OH61P116  0.7203849   103.9  22741.65   3.56  532  2   2.356e-01   1.428e-01   9.280e-02  22  136  5.363e-02  5.365e-02  5.361e-02  7.455e-02  8.970e-02  5.855e-02  7.406e-02  5.780e-02  1.000e+16  1.000e+16  1.000e+16 
 OH61P117  0.7280137   115.7  23196.20   3.93  532  2   2.036e-01   1.137e-01   8.997e-02  30  144  5.510e-02  5.512e-02  5.507e-02  7.791e-02  9.493e-02  5.984e-02  7.430e-02  5.872e-02  1.000e+16  1.000e+16  1.000e+16 
 OH61P118  0.7361307   128.3  23673.10   4.31  532  2   1.878e-01   9.374e-02   9.410e-02  20  152  5.654e-02  5.656e-02  5.651e-02  8.133e-02  1.003e-01  6.108e-02  7.450e-02  5.946e-02  1.000e+16  1.000e+16  1.000e+16 
 OH61P119  0.7447612   142.0  24171.67   4.69  532  2   1.237e-01   8.026e-02   4.342e-02  30  160  5.793e-02  5.796e-02  5.789e-02  8.478e-02  1.058e-01  6.222e-02  7.464e-02  6.000e-02  1.000e+16  1.000e+16  1.000e+16 
 OH61P120  0.7539328   156.6  24691.16   5.07  301  2   8.282e-02   5.752e-02   2.529e-02  03  168  5.924e-02  5.927e-02  5.920e-02  8.820e-02  1.113e-01  6.323e-02  7.474e-02  6.033e-02  1.000e+16  1.000e+16  1.000e+16 
 OH61P201  0.6524228     3.0  19081.65   0.06  231  1   1.789e+00   8.943e-01   8.943e-01  33    8  3.762e-02  3.762e-02  3.763e-02  4.039e-02  4.039e-02  4.039e-02  7.411e-02  4.174e-02  1.820e-01  3.800e-02  3.600e-02 
 OH61P202  0.6545831     1.6  19128.24   0.09  231  1   2.485e+00   1.243e+00   1.243e+00  33   16  3.595e-02  3.595e-02  3.596e-02  3.927e-02  3.927e-02  3.927e-02  6.885e-02  3.985e-02  1.640e-01  3.700e-02  3.400e-02 
 OH61P203  0.6570594    -0.6  19205.50   0.11  231  1   2.204e+00   1.102e+00   1.102e+00  33   24  3.625e-02  3.624e-02  3.625e-02  4.028e-02  4.028e-02  4.028e-02  6.760e-02  4.017e-02  1.570e-01  3.700e-02  3.400e-02 
 OH61P204  0.6598466    -3.5  19312.95   0.09  231  1   1.350e+00   6.751e-01   6.751e-01  33   32  3.717e-02  3.716e-02  3.717e-02  4.202e-02  4.202e-02  4.202e-02  6.758e-02  4.120e-02  1.530e-01  3.800e-02  3.400e-02 
 OH61P205  0.6629454    -6.9  19450.06   0.03  231  1   6.722e-01   3.361e-01   3.361e-01  33   40  3.835e-02  3.834e-02  3.835e-02  4.411e-02  4.411e-02  4.411e-02  6.808e-02  4.253e-02  1.510e-01  3.900e-02  3.500e-02 
 OH61P206  0.6663609   -10.6  19616.32  -0.06  231  1   3.402e-01   1.701e-01   1.701e-01  33   48  3.964e-02  3.964e-02  3.965e-02  4.639e-02  4.455e-02  4.823e-02  6.876e-02  4.399e-02  1.490e-01  4.000e-02  3.500e-02 
 OH61P207  0.6701003   -14.8  19811.22  -0.18  366  1   2.532e-01   1.266e-01   1.266e-01  33   56  4.099e-02  4.099e-02  4.100e-02  4.880e-02  4.602e-02  5.158e-02  6.951e-02  4.552e-02  1.470e-01  4.200e-02  3.500e-02 
 OH61P208  0.6741723   -19.3  20034.28  -0.33  533  2   1.966e-01   1.024e-01   9.420e-02  30   64  4.237e-02  4.236e-02  4.237e-02  5.131e-02  4.749e-02  5.511e-02  7.027e-02  4.706e-02  1.450e-01  4.300e-02  3.600e-02 
 OH61P209  0.6785867   -24.3  20285.04  -0.51  532  2   1.622e-01   6.498e-02   9.722e-02  33   72  4.375e-02  4.375e-02  4.376e-02  5.391e-02  4.896e-02  5.882e-02  7.096e-02  4.860e-02  1.440e-01  4.400e-02  3.600e-02 
 OH61P210  0.6833542   -29.7  20562.99  -0.71  533  2   1.848e-01   7.565e-02   1.092e-01  33   80  4.515e-02  4.514e-02  4.515e-02  5.660e-02  5.041e-02  6.271e-02  7.164e-02  5.012e-02  1.420e-01  4.600e-02  3.600e-02 
 OH61P211  0.6884867   -35.5  20867.65  -0.94  532  2   1.689e-01   8.684e-02   8.204e-02  11   88  4.655e-02  4.655e-02  4.656e-02  5.937e-02  5.185e-02  6.678e-02  7.225e-02  5.161e-02  1.400e-01  4.700e-02  3.600e-02 
 OH61P212  0.6939970   -41.9  21198.51  -1.18  532  2   1.995e-01   9.014e-02   1.093e-01  30   96  4.797e-02  4.796e-02  4.797e-02  6.223e-02  5.327e-02  7.104e-02  7.277e-02  5.304e-02  1.420e-01  4.800e-02  3.700e-02 
 OH61P213  0.6998990   -48.8  21555.03  -1.44  532  2   1.876e-01   8.670e-02   1.009e-01  10  104  4.939e-02  4.938e-02  4.940e-02  6.520e-02  5.468e-02  7.549e-02  7.327e-02  5.441e-02  1.370e-01  5.000e-02  3.700e-02 
 OH61P214  0.7062084   -56.3  21936.63  -1.72  532  2   3.304e-01   2.329e-01   9.748e-02  20  112  5.083e-02  5.082e-02  5.084e-02  6.826e-02  5.607e-02  8.014e-02  7.367e-02  5.570e-02  1.350e-01  5.100e-02  3.700e-02 
 OH61P215  0.7129421   -64.5  22342.72  -2.01  532  2   1.392e-01   5.003e-02   8.917e-02  32  120  5.229e-02  5.227e-02  5.230e-02  7.143e-02  5.744e-02  8.500e-02  7.401e-02  5.688e-02  1.330e-01  5.200e-02  3.700e-02 
 OH61P219  0.7445250  -104.0  24199.02  -3.28  532  2   1.301e-01   7.997e-02   5.013e-02  03  152  5.801e-02  5.798e-02  5.803e-02  8.489e-02  6.247e-02  1.062e-01  7.482e-02  6.011e-02  1.000e+16  1.000e+16  1.000e+16 
 OH61P220  0.7537036  -115.9  24717.54  -3.61  302  2   8.749e-02   5.196e-02   3.553e-02  03  160  5.931e-02  5.929e-02  5.934e-02  8.831e-02  6.350e-02  1.118e-01  7.490e-02  6.044e-02  1.000e+16  1.000e+16  1.000e+16 
 OH61Q101  0.6500524    -1.8  18951.87   0.02  231  1   7.439e+00   3.720e+00   3.720e+00  33   16  3.055e-02  3.055e-02  3.055e-02  3.092e-02  3.092e-02  3.092e-02  6.305e-02  3.402e-02  1.610e-01  3.000e-02  3.000e-02 
 OH61Q102  0.6506792    -6.5  19017.85   0.06  231  1   2.475e+00   1.237e+00   1.237e+00  33   24  1.250e-02  1.251e-02  1.250e-02  1.064e-02  1.064e-02  1.064e-02  2.578e-02  1.392e-02  6.600e-02  1.200e-02  1.200e-02 
 OH61Q103  0.6515791   -14.6  19110.65   0.14  231  1   7.438e-01   3.719e-01   3.719e-01  33   32  6.603e-03  6.606e-03  6.600e-03  4.721e-03  4.702e-03  4.739e-03  1.359e-02  7.355e-03  3.500e-02  7.000e-03  6.000e-03 
 OH61Q104  0.6527638   -26.4  19230.48   0.25  231  2   1.721e-01   8.233e-02   8.980e-02  22   40  4.001e-03  4.003e-03  3.998e-03  2.404e-03  2.316e-03  2.492e-03  8.214e-03  4.461e-03  2.100e-02  4.000e-03  4.000e-03 
 OH61Q201  0.6499322    -5.5  19081.65   0.06  231  1   7.948e-01   3.974e-01   3.974e-01  33    8  1.758e-02  1.758e-02  1.758e-02  1.779e-02  1.779e-02  1.779e-02  3.623e-02  1.959e-02  9.300e-02  1.700e-02  1.700e-02 
 OH61Q202  0.6504456    -9.3  19128.24   0.09  231  1   1.971e-01   9.854e-02   9.854e-02  33   16  3.876e-03  3.876e-03  3.875e-03  3.297e-03  3.297e-03  3.297e-03  7.967e-03  4.334e-03  2.000e-02  4.000e-03  4.000e-03 
 OH61Q203  0.6512894   -10.2  19205.50   0.11  231  1   6.156e-02   3.078e-02   3.078e-02  33   24  1.890e-03  1.890e-03  1.889e-03  1.351e-03  1.351e-03  1.351e-03  3.869e-03  2.122e-03  1.000e-02  2.000e-03  2.000e-03 
 OH61R102  0.6472761    -1.4  19017.85   0.06  231  1   2.841e+00   1.420e+00   1.420e+00  33   24  1.219e-02  1.219e-02  1.219e-02  1.229e-02  1.229e-02  1.229e-02  2.702e-02  1.370e-02  7.400e-02  1.200e-02  1.200e-02 
 OH61R104  0.6465309    -1.6  19230.48   0.25  231  1   1.203e+00   6.017e-01   6.017e-01  33   40  1.575e-02  1.575e-02  1.575e-02  1.534e-02  1.534e-02  1.534e-02  3.735e-02  1.787e-02  1.080e-01  1.600e-02  1.600e-02 
 OH61R105  0.6465590    -0.8  19377.50   0.39  231  1   5.224e-01   2.612e-01   2.612e-01  33   48  1.537e-02  1.537e-02  1.536e-02  1.471e-02  1.471e-02  1.471e-02  3.782e-02  1.755e-02  1.130e-01  1.500e-02  1.500e-02 
 OH61R108  0.6483617     4.6  19981.53   1.01  231  1   4.767e-02   2.384e-02   2.384e-02  30   72  1.245e-02  1.245e-02  1.245e-02  1.132e-02  1.132e-02  1.132e-02  3.482e-02  1.455e-02  1.150e-01  1.200e-02  1.200e-02 
 OH61R110  0.6510628    10.6  20518.40   1.54  231  1   4.481e-02   2.240e-02   2.240e-02  30   88  1.020e-02  1.020e-02  1.020e-02  8.956e-03  8.956e-03  8.956e-03  3.150e-02  1.212e-02  1.120e-01  1.000e-02  1.000e-02 
 OH61R202  0.6479701    -0.8  19128.24   0.09  231  1   1.050e+00   5.249e-01   5.249e-01  33   16  1.543e-02  1.543e-02  1.543e-02  1.555e-02  1.555e-02  1.555e-02  3.346e-02  1.726e-02  9.000e-02  1.500e-02  1.500e-02 
 OH61R203  0.6471933     0.8  19205.50   0.11  231  1   9.750e-01   4.875e-01   4.875e-01  33   24  1.719e-02  1.718e-02  1.719e-02  1.703e-02  1.703e-02  1.703e-02  3.864e-02  1.932e-02  1.070e-01  1.700e-02  1.700e-02 
 OH61R205  0.6466682     2.6  19450.06   0.03  231  1   2.660e-01   1.330e-01   1.330e-01  33   40  1.620e-02  1.619e-02  1.620e-02  1.550e-02  1.550e-02  1.550e-02  3.934e-02  1.843e-02  1.170e-01  1.600e-02  1.600e-02 
 OH61R208  0.6483044     1.4  20034.28  -0.33  231  1   4.332e-02   2.166e-02   2.166e-02  33   64  1.275e-02  1.275e-02  1.276e-02  1.159e-02  1.159e-02  1.159e-02  3.537e-02  1.487e-02  1.170e-01  1.200e-02  1.300e-02 
 OH61R209  0.6494790    -0.1  20285.04  -0.51  231  1   2.933e-02   1.466e-02   1.466e-02  30   72  1.155e-02  1.155e-02  1.155e-02  1.032e-02  1.032e-02  1.032e-02  3.363e-02  1.359e-02  1.150e-01  1.100e-02  1.100e-02 
 OH61R210  0.6509692    -1.9  20562.99  -0.71  231  1   2.856e-02   1.428e-02   1.428e-02  03   80  1.037e-02  1.037e-02  1.038e-02  9.112e-03  9.112e-03  9.112e-03  3.181e-02  1.231e-02  1.130e-01  1.000e-02  1.000e-02 
 OH62P101  0.8401477     5.0  18951.87   0.02  531  1   1.200e+02   5.999e+01   5.999e+01  33   16  4.876e-01  4.876e-01  4.876e-01  5.020e-01  5.020e-01  5.020e-01  7.372e-01  4.339e-01  1.439e+00  3.910e-01  5.290e-01 
 OH62P102  0.8432491     9.6  19017.85   0.06  532  1   1.364e+02   6.822e+01   6.822e+01  33   24  5.990e-01  5.990e-01  5.990e-01  6.196e-01  6.196e-01  6.196e-01  8.953e-01  5.343e-01  1.719e+00  4.830e-01  6.440e-01 
 OH62P103  0.8467686    15.1  19110.65   0.14  532  1   9.877e+01   4.939e+01   4.939e+01  33   32  6.479e-01  6.479e-01  6.479e-01  6.733e-01  6.733e-01  6.733e-01  9.582e-01  5.792e-01  1.810e+00  5.260e-01  6.900e-01 
 OH62P104  0.8507180    21.3  19230.48   0.25  531  2   5.369e+01   2.737e+01   2.633e+01  33   40  6.783e-01  6.783e-01  6.783e-01  7.081e-01  7.116e-01  7.046e-01  9.930e-01  6.076e-01  1.845e+00  5.540e-01  7.170e-01 
 OH62P105  0.8551061    28.1  19377.50   0.39  230  2   2.460e+01   1.256e+01   1.204e+01  33   48  7.010e-01  7.010e-01  7.010e-01  7.352e-01  7.515e-01  7.187e-01  1.016e+00  6.291e-01  1.858e+00  5.740e-01  7.360e-01 
 OH62P106  0.8599407    35.5  19551.73   0.57  230  2   1.022e+01   5.343e+00   4.873e+00  33   56  7.196e-01  7.197e-01  7.196e-01  7.582e-01  7.881e-01  7.280e-01  1.034e+00  6.470e-01  1.860e+00  5.920e-01  7.510e-01 
 OH62P107  0.8652304    43.4  19753.13   0.77  230  2   4.710e+00   2.293e+00   2.417e+00  22   64  7.356e-01  7.357e-01  7.355e-01  7.786e-01  8.227e-01  7.340e-01  1.049e+00  6.625e-01  1.855e+00  6.070e-01  7.630e-01 
 OH62P108  0.8709852    51.9  19981.53   1.01  530  2   4.005e+00   2.178e+00   1.827e+00  33   72  7.496e-01  7.497e-01  7.494e-01  7.971e-01  8.558e-01  7.375e-01  1.060e+00  6.761e-01  1.845e+00  6.200e-01  7.750e-01 
 OH62P109  0.8772168    61.0  20236.72   1.26  529  2   3.687e+00   2.082e+00   1.605e+00  33   80  7.618e-01  7.619e-01  7.616e-01  8.138e-01  8.875e-01  7.387e-01  1.070e+00  6.883e-01  1.833e+00  6.320e-01  7.860e-01 
 OH62P110  0.8839385    70.9  20518.40   1.54  530  2   4.918e+01   4.741e+01   1.774e+00  22   88  7.724e-01  7.726e-01  7.722e-01  8.290e-01  9.179e-01  7.379e-01  1.078e+00  6.990e-01  1.817e+00  6.420e-01  7.940e-01 
 OH62P111  0.8911658    81.5  20826.23   1.84  528  2   4.109e+00   2.305e+00   1.804e+00  33   96  7.815e-01  7.817e-01  7.813e-01  8.427e-01  9.471e-01  7.354e-01  1.085e+00  7.084e-01  1.799e+00  6.520e-01  8.020e-01 
 OH62P112  0.8989161    93.0  21159.79   2.16  530  2   3.292e+00   2.381e+00   9.103e-01  11  104  7.892e-01  7.895e-01  7.890e-01  8.549e-01  9.748e-01  7.311e-01  1.090e+00  7.166e-01  1.779e+00  6.600e-01  8.080e-01 
 OH62P113  0.9072089   105.3  21518.64   2.49  528  2   3.879e+00   2.238e+00   1.641e+00  33  112  7.956e-01  7.958e-01  7.953e-01  8.658e-01  1.001e+00  7.252e-01  1.094e+00  7.236e-01  1.757e+00  6.670e-01  8.130e-01 
 OH62P114  0.9160662   118.6  21902.26   2.83  529  2   3.050e+00   1.760e+00   1.289e+00  33  120  8.006e-01  8.009e-01  8.003e-01  8.753e-01  1.026e+00  7.179e-01  1.096e+00  7.294e-01  1.733e+00  6.740e-01  8.170e-01 
 OH62P115  0.9255125   133.0  22310.13   3.19  529  2   3.067e+00   1.915e+00   1.151e+00  33  128  8.045e-01  8.048e-01  8.041e-01  8.836e-01  1.050e+00  7.093e-01  1.099e+00  7.342e-01  1.000e+16  6.800e-01  8.190e-01 
 OH62P116  0.9355749   148.4  22741.65   3.56  528  2   3.296e+00   1.909e+00   1.388e+00  31  136  8.072e-01  8.076e-01  8.068e-01  8.907e-01  1.072e+00  6.996e-01  1.099e+00  7.378e-01  1.000e+16  1.000e+16  1.000e+16 
 OH62P118  0.9576731   183.0  23673.10   4.31  299  2   2.810e+00   1.749e+00   1.061e+00  30  152  8.098e-01  8.103e-01  8.094e-01  9.019e-01  1.112e+00  6.773e-01  1.096e+00  7.420e-01  1.000e+16  1.000e+16  1.000e+16 
 OH62P119  0.9697799   202.4  24171.67   4.69  300  2   2.299e+00   1.503e+00   7.963e-01  33  160  8.100e-01  8.105e-01  8.095e-01  9.063e-01  1.131e+00  6.651e-01  1.095e+00  7.426e-01  1.000e+16  1.000e+16  1.000e+16 
 OH62P201  0.8384697     4.5  19081.65   0.06  532  1   3.505e+01   1.752e+01   1.752e+01  33    8  7.692e-01  7.691e-01  7.692e-01  7.919e-01  7.919e-01  7.919e-01  1.172e+00  6.824e-01  2.320e+00  6.350e-01  8.410e-01 
 OH62P202  0.8417545     2.3  19128.24   0.09  531  1   4.669e+01   2.335e+01   2.335e+01  33   16  7.205e-01  7.204e-01  7.206e-01  7.452e-01  7.452e-01  7.452e-01  1.083e+00  6.412e-01  2.105e+00  5.950e-01  7.790e-01 
 OH62P203  0.8454573    -1.1  19205.50   0.11  532  1   3.990e+01   1.995e+01   1.995e+01  33   24  7.124e-01  7.123e-01  7.125e-01  7.403e-01  7.403e-01  7.403e-01  1.058e+00  6.358e-01  2.018e+00  5.890e-01  7.620e-01 
 OH62P204  0.8495723    -5.4  19312.95   0.09  532  1   2.474e+01   1.237e+01   1.237e+01  33   32  7.169e-01  7.168e-01  7.170e-01  7.484e-01  7.484e-01  7.484e-01  1.053e+00  6.414e-01  1.971e+00  5.930e-01  7.600e-01 
 OH62P205  0.8541021   -10.4  19450.06   0.03  230  1   1.251e+01   6.257e+00   6.257e+00  33   40  7.262e-01  7.260e-01  7.263e-01  7.616e-01  7.616e-01  7.616e-01  1.055e+00  6.511e-01  1.941e+00  6.010e-01  7.640e-01 
 OH62P207  0.8644427   -22.0  19811.22  -0.18  230  2   4.353e+00   1.721e+00   2.632e+00  33   56  7.484e-01  7.483e-01  7.485e-01  7.922e-01  7.470e-01  8.372e-01  1.068e+00  6.736e-01  1.897e+00  6.210e-01  7.780e-01 
 OH62P208  0.8702783   -28.5  20034.28  -0.33  530  2   2.819e+00   1.246e+00   1.573e+00  33   64  7.593e-01  7.592e-01  7.594e-01  8.074e-01  7.473e-01  8.672e-01  1.075e+00  6.846e-01  1.877e+00  6.320e-01  7.850e-01 
 OH62P209  0.8765767   -35.6  20285.04  -0.51  529  2   2.738e+00   1.181e+00   1.556e+00  33   72  7.694e-01  7.693e-01  7.695e-01  8.220e-01  7.465e-01  8.969e-01  1.082e+00  6.950e-01  1.856e+00  6.410e-01  7.930e-01 
 OH62P210  0.8833540   -43.4  20562.99  -0.71  529  2   3.384e+00   1.273e+00   2.111e+00  11   80  7.786e-01  7.784e-01  7.787e-01  8.356e-01  7.444e-01  9.259e-01  1.087e+00  7.044e-01  1.835e+00  6.500e-01  8.010e-01 
 OH62P211  0.8906278   -51.7  20867.65  -0.94  529  2   1.754e+01   1.242e+00   1.630e+01  11   88  7.866e-01  7.865e-01  7.868e-01  8.482e-01  7.408e-01  9.540e-01  1.092e+00  7.129e-01  1.812e+00  6.580e-01  8.070e-01 
 OH62P212  0.8984172   -60.8  21198.51  -1.18  529  2   3.536e+00   1.313e+00   2.223e+00  33   96  7.935e-01  7.933e-01  7.937e-01  8.596e-01  7.358e-01  9.811e-01  1.096e+00  7.204e-01  1.838e+00  6.650e-01  8.130e-01 
 OH62P213  0.9067431   -70.6  21555.03  -1.44  529  2   2.798e+00   1.158e+00   1.640e+00  33  104  7.992e-01  7.990e-01  7.994e-01  8.698e-01  7.295e-01  1.007e+00  1.099e+00  7.268e-01  1.764e+00  6.720e-01  8.170e-01 
 OH62P214  0.9156285   -81.2  21936.63  -1.72  529  2   2.425e+00   1.012e+00   1.413e+00  33  112  8.038e-01  8.036e-01  8.040e-01  8.788e-01  7.218e-01  1.032e+00  1.102e+00  7.322e-01  1.738e+00  6.780e-01  8.200e-01 
 OH62P215  0.9250987   -92.7  22342.72  -2.01  529  2   2.288e+00   9.057e-01   1.382e+00  33  120  8.072e-01  8.070e-01  8.074e-01  8.866e-01  7.130e-01  1.055e+00  1.102e+00  7.366e-01  1.711e+00  6.830e-01  8.220e-01 
 OH62P217  0.9459078  -118.6  23225.86  -2.63  528  2   2.595e+00   9.104e-01   1.684e+00  23  136  8.111e-01  8.108e-01  8.114e-01  8.991e-01  6.922e-01  1.098e+00  1.102e+00  7.424e-01  1.000e+16  1.000e+16  1.000e+16 
 OH62P218  0.9573116  -133.1  23701.54  -2.95  299  2   2.111e+00   7.997e-01   1.311e+00  32  144  8.117e-01  8.114e-01  8.120e-01  9.040e-01  6.806e-01  1.118e+00  1.099e+00  7.438e-01  1.000e+16  1.000e+16  1.000e+16 
 OH62P219  0.9694307  -148.8  24199.02  -3.28  300  2   2.166e+00   1.443e+00   7.233e-01  11  152  8.117e-01  8.113e-01  8.120e-01  9.081e-01  6.683e-01  1.136e+00  1.096e+00  7.442e-01  1.000e+16  1.000e+16  1.000e+16 
 OH62Q101  0.8346894    -2.7  18951.87   0.02  532  1   1.489e+02   7.443e+01   7.443e+01  33   16  6.450e-01  6.450e-01  6.450e-01  6.360e-01  6.360e-01  6.360e-01  1.006e+00  5.693e-01  2.048e+00  5.190e-01  7.220e-01 
 OH62Q102  0.8355161   -10.1  19017.85   0.06  532  1   5.308e+01   2.654e+01   2.654e+01  33   24  2.639e-01  2.640e-01  2.639e-01  2.345e-01  2.345e-01  2.345e-01  4.119e-01  2.326e-01  8.390e-01  2.130e-01  2.960e-01 
 OH62Q103  0.8367020   -23.1  19110.65   0.14  532  2   1.734e+01   8.586e+00   8.755e+00  33   32  1.392e-01  1.392e-01  1.391e-01  1.114e-01  1.110e-01  1.119e-01  2.174e-01  1.225e-01  4.420e-01  1.120e-01  1.570e-01 
 OH62Q104  0.8382625   -41.7  19230.48   0.25  532  2   4.777e+00   2.306e+00   2.471e+00  33   40  8.406e-02  8.409e-02  8.402e-02  6.065e-02  5.843e-02  6.288e-02  1.314e-01  7.394e-02  2.670e-01  6.800e-02  9.500e-02 
 OH62Q105  0.8402096   -65.9  19377.50   0.39  532  2   1.198e+02   5.368e-01   1.193e+02  11   48  5.540e-02  5.543e-02  5.537e-02  3.602e-02  3.353e-02  3.852e-02  8.664e-02  4.871e-02  1.750e-01  4.500e-02  6.300e-02 
 OH62Q106  0.8425529   -95.5  19551.73   0.57  530  2   5.484e-01   4.189e-01   1.295e-01  22   56  3.885e-02  3.887e-02  3.882e-02  2.276e-02  2.046e-02  2.508e-02  6.081e-02  3.415e-02  1.230e-01  3.200e-02  4.400e-02 
 OH62Q107  0.8453012  -130.2  19753.13   0.77  532  2   2.847e-01   2.342e-01   5.046e-02  02   64  2.855e-02  2.856e-02  2.853e-02  1.507e-02  1.306e-02  1.710e-02  4.470e-02  2.510e-02  9.000e-02  2.300e-02  3.300e-02 
 OH62Q201  0.8345328    -8.8  19081.65   0.06  532  1   1.644e+01   8.221e+00   8.221e+00  33    8  3.705e-01  3.705e-01  3.705e-01  3.654e-01  3.654e-01  3.654e-01  5.773e-01  3.273e-01  1.175e+00  2.980e-01  4.140e-01 
 OH62Q202  0.8352069   -14.9  19128.24   0.09  532  1   4.521e+00   2.260e+00   2.260e+00  33   16  8.129e-02  8.129e-02  8.128e-02  7.223e-02  7.223e-02  7.223e-02  1.266e-01  7.204e-02  2.570e-01  6.500e-02  9.100e-02 
 OH62Q204  0.8378462   -12.5  19312.95   0.09  532  1   5.019e-01   2.510e-01   2.510e-01  33   32  2.486e-02  2.487e-02  2.485e-02  1.794e-02  1.794e-02  1.794e-02  3.864e-02  2.214e-02  7.800e-02  2.000e-02  2.800e-02 
 OH62Q205  0.8397900    -2.8  19450.06   0.03  532  1   1.380e-01   6.899e-02   6.899e-02  33   40  1.783e-02  1.784e-02  1.781e-02  1.159e-02  1.159e-02  1.159e-02  2.768e-02  1.589e-02  5.600e-02  1.400e-02  2.000e-02 
 OH62R102  0.8301177    -2.5  19017.85   0.06  532  1   5.997e+01   2.998e+01   2.998e+01  33   24  2.701e-01  2.701e-01  2.701e-01  2.729e-01  2.729e-01  2.729e-01  4.365e-01  2.368e-01  9.280e-01  2.180e-01  3.130e-01 
 OH62R103  0.8290881    -3.4  19110.65   0.14  532  1   4.982e+01   2.491e+01   2.491e+01  33   32  3.445e-01  3.445e-01  3.444e-01  3.465e-01  3.465e-01  3.465e-01  5.660e-01  3.008e-01  1.227e+00  2.750e-01  4.070e-01 
 OH62R104  0.8283960    -3.7  19230.48   0.25  532  1   2.739e+01   1.370e+01   1.370e+01  33   40  3.656e-01  3.657e-01  3.656e-01  3.661e-01  3.661e-01  3.661e-01  6.114e-01  3.178e-01  1.351e+00  2.890e-01  4.410e-01 
 OH62R107  0.8284947     0.2  19753.13   0.77  532  1   2.165e+00   1.082e+00   1.082e+00  33   64  3.406e-01  3.406e-01  3.405e-01  3.363e-01  3.363e-01  3.363e-01  6.074e-01  2.912e-01  1.421e+00  2.610e-01  4.430e-01 
 OH62R109  0.8304815     6.2  20236.72   1.26  532  1   1.332e+00   6.662e-01   6.662e-01  33   80  3.017e-01  3.018e-01  3.017e-01  2.952e-01  2.952e-01  2.952e-01  5.674e-01  2.546e-01  1.381e+00  2.260e-01  4.200e-01 
 OH62R110  0.8320768    10.3  20518.40   1.54  532  1   1.265e+00   6.323e-01   6.323e-01  33   88  2.803e-01  2.803e-01  2.802e-01  2.729e-01  2.729e-01  2.729e-01  5.432e-01  2.348e-01  1.349e+00  2.070e-01  4.060e-01 
 OH62R111  0.8340841    15.0  20826.23   1.84  532  1   1.220e+00   6.099e-01   6.099e-01  33   96  2.583e-01  2.583e-01  2.582e-01  2.503e-01  2.503e-01  2.503e-01  5.175e-01  2.147e-01  1.310e+00  1.880e-01  3.900e-01 
 OH62R112  0.8365126    20.4  21159.79   2.16  532  2   1.084e+00   5.884e-01   4.958e-01  33  104  2.361e-01  2.361e-01  2.360e-01  2.278e-01  2.278e-01  2.278e-01  4.909e-01  1.946e-01  1.267e+00  1.700e-01  3.740e-01 
 OH62R113  0.8393722    26.6  21518.64   2.49  532  2   8.898e-01   4.762e-01   4.136e-01  33  112  2.140e-01  2.140e-01  2.139e-01  2.055e-01  2.073e-01  2.037e-01  4.631e-01  1.749e-01  1.220e+00  1.520e-01  3.570e-01 
 OH62R114  0.8426741    33.6  21902.26   2.83  528  2   7.067e-01   4.067e-01   3.000e-01  30  120  1.923e-01  1.923e-01  1.922e-01  1.838e-01  1.885e-01  1.789e-01  4.351e-01  1.556e-01  1.169e+00  1.340e-01  3.400e-01 
 OH62R115  0.8464308    41.3  22310.13   3.19  532  2   5.275e-01   2.917e-01   2.359e-01  33  128  1.711e-01  1.712e-01  1.711e-01  1.629e-01  1.697e-01  1.556e-01  4.071e-01  1.371e-01  1.000e+16  1.180e-01  3.220e-01 
 OH62R116  0.8506564    50.0  22741.65   3.56  531  2   1.878e+01   2.762e-01   1.851e+01  11  136  1.508e-01  1.508e-01  1.507e-01  1.428e-01  1.512e-01  1.340e-01  3.788e-01  1.194e-01  1.000e+16  1.000e+16  1.000e+16 
 OH62R117  0.8553669    59.5  23196.20   3.93  230  2   4.382e-01   2.468e-01   1.915e-01  33  144  1.313e-01  1.314e-01  1.313e-01  1.238e-01  1.331e-01  1.140e-01  3.510e-01  1.027e-01  1.000e+16  1.000e+16  1.000e+16 
 OH62R118  0.8605802    70.0  23673.10   4.31  230  2   2.887e-01   1.627e-01   1.259e-01  22  152  1.130e-01  1.131e-01  1.130e-01  1.061e-01  1.157e-01  9.572e-02  3.234e-01  8.702e-02  1.000e+16  1.000e+16  1.000e+16 
 OH62R202  0.8313005    -1.6  19128.24   0.09  532  1   2.137e+01   1.068e+01   1.068e+01  33   16  3.371e-01  3.371e-01  3.371e-01  3.407e-01  3.407e-01  3.407e-01  5.387e-01  2.958e-01  1.130e+00  2.620e-01  3.870e-01 
 OH62R203  0.8298521     0.8  19205.50   0.11  532  1   2.067e+01   1.033e+01   1.033e+01  33   24  3.849e-01  3.848e-01  3.849e-01  3.871e-01  3.871e-01  3.871e-01  6.264e-01  3.363e-01  1.342e+00  2.990e-01  4.500e-01 
 OH62R204  0.8288676     2.9  19312.95   0.09  532  1   1.288e+01   6.439e+00   6.439e+00  33   32  3.907e-01  3.907e-01  3.908e-01  3.912e-01  3.912e-01  3.912e-01  6.484e-01  3.399e-01  1.419e+00  3.020e-01  4.670e-01 
 OH62R205  0.8283306     4.3  19450.06   0.03  532  1   6.094e+00   3.047e+00   3.047e+00  33   40  3.823e-01  3.823e-01  3.824e-01  3.811e-01  3.811e-01  3.811e-01  6.478e-01  3.309e-01  1.449e+00  2.930e-01  4.680e-01 
 OH62R206  0.8282262     4.9  19616.32  -0.06  532  1   2.802e+00   1.401e+00   1.401e+00  33   48  3.674e-01  3.673e-01  3.674e-01  3.644e-01  3.644e-01  3.644e-01  6.364e-01  3.162e-01  1.454e+00  2.800e-01  4.620e-01 
 OH62R207  0.8285443     4.7  19811.22  -0.18  532  1   1.461e+00   7.304e-01   7.304e-01  33   56  3.488e-01  3.488e-01  3.489e-01  3.444e-01  3.444e-01  3.444e-01  6.188e-01  2.984e-01  1.445e+00  2.640e-01  4.510e-01 
 OH62R209  0.8304293     2.3  20285.04  -0.51  532  1   9.948e-01   4.974e-01   4.974e-01  33   72  3.064e-01  3.064e-01  3.065e-01  2.998e-01  2.998e-01  2.998e-01  5.738e-01  2.588e-01  1.398e+00  2.270e-01  4.240e-01 
 OH62R210  0.8319963     0.2  20562.99  -0.71  532  1   9.060e-01   4.530e-01   4.530e-01  33   80  2.840e-01  2.839e-01  2.840e-01  2.765e-01  2.765e-01  2.765e-01  5.483e-01  2.381e-01  1.365e+00  2.080e-01  4.090e-01 
 OH62R211  0.8339842    -2.6  20867.65  -0.94  532  1   8.565e-01   4.282e-01   4.282e-01  33   88  2.612e-01  2.612e-01  2.613e-01  2.532e-01  2.532e-01  2.532e-01  5.215e-01  2.173e-01  1.326e+00  1.890e-01  3.930e-01 
 OH62R212  0.8363993    -6.1  21198.51  -1.18  532  1   8.285e-01   4.142e-01   4.142e-01  33   96  2.384e-01  2.384e-01  2.385e-01  2.301e-01  2.301e-01  2.301e-01  4.940e-01  1.967e-01  1.315e+00  1.700e-01  3.760e-01 
 OH62R213  0.8392496   -10.2  21555.03  -1.44  532  1   6.553e-01   3.276e-01   3.276e-01  33  104  2.159e-01  2.159e-01  2.160e-01  2.074e-01  2.056e-01  2.092e-01  4.658e-01  1.766e-01  1.236e+00  1.520e-01  3.590e-01 
 OH62R215  0.8462972   -20.6  22342.72  -2.01  532  2   3.953e-01   1.762e-01   2.191e-01  33  120  1.725e-01  1.725e-01  1.725e-01  1.642e-01  1.570e-01  1.711e-01  4.091e-01  1.383e-01  1.131e+00  1.180e-01  3.230e-01 
 OH62R216  0.8505197   -26.9  22772.69  -2.32  532  2   9.702e-01   1.707e-01   7.995e-01  11  128  1.519e-01  1.519e-01  1.520e-01  1.439e-01  1.351e-01  1.524e-01  3.807e-01  1.205e-01  1.000e+16  1.020e-01  3.060e-01 
 OH62R217  0.8552279   -34.0  23225.86  -2.63  230  2   3.299e-01   1.616e-01   1.683e-01  30  136  1.323e-01  1.323e-01  1.324e-01  1.248e-01  1.149e-01  1.342e-01  3.525e-01  1.036e-01  1.000e+16  1.000e+16  1.000e+16 
 OH62R218  0.8604395   -41.9  23701.54  -2.95  230  2   2.148e-01   7.896e-02   1.358e-01  22  144  1.138e-01  1.138e-01  1.139e-01  1.068e-01  9.651e-02  1.167e-01  3.249e-01  8.776e-02  1.000e+16  1.000e+16  1.000e+16 
 OH71P106  0.5698244    19.5  22107.31   0.51  226  2   1.271e-01   7.715e-02   4.999e-02  30   56  5.969e-03  5.969e-03  5.969e-03  6.928e-03  7.201e-03  6.652e-03  1.431e-02  6.958e-03  3.400e-02  1.000e+16  1.000e+16 
 OH71P107  0.5728314    24.2  22298.78   0.70  231  2   5.430e-02   2.820e-02   2.610e-02  01   64  6.231e-03  6.231e-03  6.231e-03  7.405e-03  7.824e-03  6.981e-03  1.462e-02  7.423e-03  3.300e-02  1.000e+16  1.000e+16 
 OH71P110  0.5836807    40.6  23025.75   1.40  231  2   5.532e-02   3.093e-02   2.439e-02  30   88  6.945e-03  6.946e-03  6.944e-03  8.859e-03  9.810e-03  7.887e-03  1.541e-02  8.914e-03  3.300e-02  1.000e+16  1.000e+16 
 OH71P112  0.5925250    54.1  23634.41   1.96  231  2   7.170e-02   3.228e-02   3.942e-02  10  104  7.427e-03  7.428e-03  7.425e-03  9.930e-03  1.133e-02  8.494e-03  1.582e-02  1.003e-02  3.300e-02  1.000e+16  1.000e+16 
 OH71P113  0.5974633    61.6  23974.70   2.26  231  2   5.130e-02   3.197e-02   1.933e-02  03  112  7.693e-03  7.695e-03  7.691e-03  1.053e-02  1.218e-02  8.824e-03  1.601e-02  1.063e-02  3.200e-02  1.000e+16  1.000e+16 
 OH71P115  0.6084409    78.7  24724.70   2.89  231  2   4.387e-02   1.838e-02   2.550e-02  03  128  8.327e-03  8.329e-03  8.324e-03  1.195e-02  1.420e-02  9.597e-03  1.633e-02  1.191e-02  1.000e+16  1.000e+16  1.000e+16 
 OH71P116  0.6145127    88.3  25133.24   3.22  231  2   2.566e-01   1.410e-02   2.425e-01  01  136  8.715e-03  8.718e-03  8.712e-03  1.281e-02  1.542e-02  1.006e-02  1.647e-02  1.258e-02  1.000e+16  1.000e+16  1.000e+16 
 OH71P206  0.5693440    -8.0  22173.51  -0.05  205  1   7.666e-02   3.833e-02   3.833e-02  03   48  6.080e-03  6.079e-03  6.080e-03  7.056e-03  6.777e-03  7.336e-03  1.465e-02  7.069e-03  3.400e-02  1.000e+16  1.000e+16 
 OH71P211  0.5876267   -28.7  23360.65  -0.85  231  2   9.756e-02   8.122e-02   1.635e-02  20   88  7.211e-03  7.210e-03  7.212e-03  9.417e-03  8.226e-03  1.059e-02  1.571e-02  9.484e-03  3.300e-02  1.000e+16  1.000e+16 
 OH71P217  0.6207753   -69.3  25593.94  -2.40  231  2   2.589e-02   8.860e-03   1.703e-02  02  136  9.171e-03  9.169e-03  9.174e-03  1.380e-02  1.063e-02  1.686e-02  1.664e-02  1.327e-02  1.000e+16  1.000e+16  1.000e+16 
 OH71P219  0.6350882   -87.9  26513.49  -2.98  231  2   3.343e-02   1.707e-02   1.636e-02  01  152  1.028e-02  1.028e-02  1.029e-02  1.622e-02  1.194e-02  2.031e-02  1.687e-02  1.458e-02  1.000e+16  1.000e+16  1.000e+16 
 OH72P101  0.6902735     3.4  21536.21   0.01  532  1   1.639e+01   8.195e+00   8.195e+00  30   16  9.809e-02  9.808e-02  9.810e-02  8.457e-02  8.457e-02  8.457e-02  1.541e-01  9.051e-02  3.480e-01  8.100e-02  7.600e-02 
 OH72P102  0.6925129     6.8  21599.13   0.05  532  1   2.111e+01   1.055e+01   1.055e+01  30   24  1.215e-01  1.215e-01  1.215e-01  1.063e-01  1.063e-01  1.063e-01  1.877e-01  1.123e-01  4.150e-01  1.010e-01  9.400e-02 
 OH72P103  0.6950961    10.9  21687.55   0.12  533  1   1.444e+01   7.218e+00   7.218e+00  33   32  1.326e-01  1.326e-01  1.326e-01  1.177e-01  1.177e-01  1.177e-01  2.014e-01  1.226e-01  4.370e-01  1.100e-01  1.030e-01 
 OH72P104  0.6980339    15.6  21801.66   0.22  532  1   8.450e+00   4.225e+00   4.225e+00  33   40  1.400e-01  1.400e-01  1.400e-01  1.262e-01  1.268e-01  1.255e-01  2.093e-01  1.295e-01  4.440e-01  1.170e-01  1.080e-01 
 OH72P105  0.7013346    20.8  21941.57   0.35  532  2   4.229e+00   2.183e+00   2.046e+00  33   48  1.460e-01  1.460e-01  1.460e-01  1.335e-01  1.365e-01  1.305e-01  2.149e-01  1.350e-01  4.470e-01  1.220e-01  1.130e-01 
 OH72P106  0.7050058    26.6  22107.31   0.51  532  2   2.144e+00   1.213e+00   9.309e-01  22   56  1.512e-01  1.512e-01  1.512e-01  1.404e-01  1.459e-01  1.348e-01  2.192e-01  1.398e-01  4.470e-01  1.260e-01  1.170e-01 
 OH72P107  0.7090553    32.8  22298.78   0.70  532  2   1.187e+00   6.069e-01   5.802e-01  31   64  1.560e-01  1.560e-01  1.560e-01  1.469e-01  1.552e-01  1.385e-01  2.229e-01  1.441e-01  4.460e-01  1.300e-01  1.210e-01 
 OH72P108  0.7134921    39.6  22515.85   0.91  532  2   8.924e-01   4.897e-01   4.027e-01  33   72  1.604e-01  1.604e-01  1.603e-01  1.533e-01  1.646e-01  1.418e-01  2.260e-01  1.480e-01  4.430e-01  1.330e-01  1.250e-01 
 OH72P109  0.7183265    46.9  22758.27   1.15  532  2   7.772e-01   4.473e-01   3.299e-01  11   80  1.644e-01  1.644e-01  1.643e-01  1.594e-01  1.739e-01  1.447e-01  2.288e-01  1.515e-01  4.400e-01  1.360e-01  1.290e-01 
 OH72P110  0.7235703    54.9  23025.75   1.40  532  2   7.939e-01   4.580e-01   3.359e-01  33   88  1.680e-01  1.681e-01  1.680e-01  1.654e-01  1.832e-01  1.473e-01  2.312e-01  1.548e-01  4.370e-01  1.380e-01  1.330e-01 
 OH72P111  0.7292369    63.5  23317.94   1.67  532  2   7.459e-01   4.310e-01   3.149e-01  33   96  1.714e-01  1.714e-01  1.713e-01  1.712e-01  1.924e-01  1.494e-01  2.333e-01  1.577e-01  4.330e-01  1.400e-01  1.370e-01 
 OH72P113  0.7419009    82.9  23974.70   2.26  532  2   6.355e-01   3.687e-01   2.668e-01  33  112  1.769e-01  1.769e-01  1.768e-01  1.820e-01  2.105e-01  1.525e-01  2.368e-01  1.629e-01  4.240e-01  1.430e-01  1.440e-01 
 OH72P114  0.7489348    93.9  24338.32   2.57  532  2   5.418e-01   2.418e-01   3.000e-01  11  120  1.791e-01  1.791e-01  1.790e-01  1.870e-01  2.193e-01  1.534e-01  2.382e-01  1.651e-01  4.190e-01  1.440e-01  1.480e-01 
 OH72P115  0.7564645   105.8  24724.70   2.89  301  2   3.430e-01   2.104e-01   1.325e-01  33  128  1.809e-01  1.810e-01  1.808e-01  1.917e-01  2.278e-01  1.539e-01  2.394e-01  1.672e-01  1.000e+16  1.440e-01  1.510e-01 
 OH72P117  0.7731107   132.6  25563.30   3.56  532  2   6.337e-01   1.766e-01   4.571e-01  11  144  1.834e-01  1.835e-01  1.834e-01  2.002e-01  2.441e-01  1.539e-01  2.415e-01  1.707e-01  1.000e+16  1.000e+16  1.000e+16 
 OH72P201  0.6891191     3.3  21666.44   0.05  532  1   4.711e+00   2.355e+00   2.355e+00  33    8  1.542e-01  1.541e-01  1.542e-01  1.329e-01  1.329e-01  1.329e-01  2.451e-01  1.418e-01  5.640e-01  1.310e-01  1.200e-01 
 OH72P202  0.6914532     2.0  21710.59   0.09  532  1   6.610e+00   3.305e+00   3.305e+00  33   16  1.457e-01  1.457e-01  1.457e-01  1.275e-01  1.275e-01  1.275e-01  2.271e-01  1.343e-01  5.090e-01  1.240e-01  1.130e-01 
 OH72P203  0.6941437    -0.3  21783.82   0.10  533  1   5.842e+00   2.921e+00   2.921e+00  33   24  1.454e-01  1.453e-01  1.454e-01  1.291e-01  1.291e-01  1.291e-01  2.224e-01  1.343e-01  4.870e-01  1.240e-01  1.130e-01 
 OH72P204  0.6971852    -3.4  21885.71   0.08  532  1   3.872e+00   1.936e+00   1.936e+00  33   32  1.476e-01  1.476e-01  1.477e-01  1.330e-01  1.330e-01  1.330e-01  2.219e-01  1.365e-01  4.750e-01  1.250e-01  1.140e-01 
 OH72P205  0.7005788    -7.0  22015.77   0.03  532  1   2.174e+00   1.087e+00   1.087e+00  33   40  1.510e-01  1.509e-01  1.510e-01  1.380e-01  1.380e-01  1.380e-01  2.230e-01  1.395e-01  4.670e-01  1.280e-01  1.170e-01 
 OH72P206  0.7043301   -11.1  22173.51  -0.05  532  1   1.158e+00   5.791e-01   5.791e-01  33   48  1.547e-01  1.546e-01  1.547e-01  1.435e-01  1.378e-01  1.492e-01  2.249e-01  1.429e-01  4.610e-01  1.310e-01  1.200e-01 
 OH72P208  0.7129413   -20.7  22570.11  -0.30  532  2   6.556e-01   3.046e-01   3.510e-01  33   64  1.622e-01  1.622e-01  1.623e-01  1.551e-01  1.435e-01  1.666e-01  2.291e-01  1.497e-01  4.500e-01  1.360e-01  1.260e-01 
 OH72P209  0.7178236   -26.3  22808.02  -0.46  532  2   5.461e-01   2.531e-01   2.930e-01  33   72  1.659e-01  1.658e-01  1.659e-01  1.609e-01  1.461e-01  1.755e-01  2.312e-01  1.529e-01  4.450e-01  1.380e-01  1.300e-01 
 OH72P210  0.7231076   -32.3  23071.70  -0.65  532  2   5.628e-01   2.432e-01   3.195e-01  33   80  1.692e-01  1.692e-01  1.693e-01  1.666e-01  1.484e-01  1.846e-01  2.331e-01  1.559e-01  4.400e-01  1.400e-01  1.340e-01 
 OH72P212  0.7349414   -46.2  23674.35  -1.08  532  2   5.414e-01   2.311e-01   3.103e-01  33   96  1.752e-01  1.751e-01  1.752e-01  1.776e-01  1.520e-01  2.027e-01  2.364e-01  1.612e-01  4.300e-01  1.430e-01  1.410e-01 
 OH72P213  0.7415254   -54.1  24012.26  -1.32  532  2   4.584e-01   1.960e-01   2.624e-01  31  104  1.776e-01  1.776e-01  1.777e-01  1.827e-01  1.533e-01  2.116e-01  2.379e-01  1.636e-01  4.240e-01  1.440e-01  1.450e-01 
 OH72P214  0.7485800   -62.7  24373.79  -1.57  532  2   3.413e-01   1.422e-01   1.991e-01  33  112  1.797e-01  1.797e-01  1.798e-01  1.876e-01  1.542e-01  2.203e-01  2.392e-01  1.657e-01  4.190e-01  1.450e-01  1.480e-01 
 OH72P217  0.7728013   -93.2  25593.94  -2.40  531  2   2.613e-01   1.002e-01   1.611e-01  31  136  1.839e-01  1.838e-01  1.840e-01  2.007e-01  1.545e-01  2.451e-01  2.422e-01  1.711e-01  1.000e+16  1.000e+16  1.000e+16 
 OH72P218  0.7819855  -105.2  26043.58  -2.69  532  2   4.978e-01   3.767e-01   1.211e-01  22  144  1.847e-01  1.846e-01  1.847e-01  2.045e-01  1.540e-01  2.530e-01  2.429e-01  1.726e-01  1.000e+16  1.000e+16  1.000e+16 
 OH72Q101  0.6865847    -1.8  21536.21   0.01  533  1   1.940e+01   9.702e+00   9.702e+00  33   16  1.275e-01  1.275e-01  1.275e-01  1.040e-01  1.040e-01  1.040e-01  2.095e-01  1.167e-01  5.000e-01  1.050e-01  1.010e-01 
 OH72Q103  0.6882983   -14.9  21687.55   0.12  532  1   2.220e+00   1.110e+00   1.110e+00  33   32  2.768e-02  2.769e-02  2.767e-02  1.639e-02  1.632e-02  1.645e-02  4.538e-02  2.517e-02  1.090e-01  2.300e-02  2.200e-02 
 OH72Q104  0.6896260   -27.0  21801.66   0.22  532  2   5.721e-01   2.641e-01   3.080e-01  33   40  1.678e-02  1.679e-02  1.677e-02  8.465e-03  8.155e-03  8.776e-03  2.747e-02  1.521e-02  6.600e-02  1.400e-02  1.300e-02 
 OH72Q105  0.6912825   -42.8  21941.57   0.35  532  2   1.425e-01   6.063e-02   8.182e-02  33   48  1.111e-02  1.111e-02  1.110e-02  4.774e-03  4.444e-03  5.105e-03  1.814e-02  1.003e-02  4.300e-02  9.000e-03  9.000e-03 
 OH72Q201  0.6864575    -5.7  21666.44   0.05  533  1   2.124e+00   1.062e+00   1.062e+00  33    8  7.320e-02  7.320e-02  7.321e-02  5.969e-02  5.969e-02  5.969e-02  1.201e-01  6.703e-02  2.870e-01  1.310e-01  5.800e-02 
 OH72R102  0.6836318    -1.4  21599.13   0.05  533  1   7.815e+00   3.908e+00   3.908e+00  33   24  5.222e-02  5.222e-02  5.221e-02  4.264e-02  4.264e-02  4.264e-02  9.001e-02  4.734e-02  2.280e-01  4.300e-02  4.200e-02 
 OH72R104  0.6829343    -1.3  21801.66   0.22  533  1   3.761e+00   1.881e+00   1.881e+00  33   40  6.942e-02  6.943e-02  6.941e-02  5.504e-02  5.504e-02  5.504e-02  1.251e-01  6.203e-02  3.350e-01  5.500e-02  5.700e-02 
 OH72R105  0.6830355    -0.3  21941.57   0.35  532  1   1.707e+00   8.537e-01   8.537e-01  33   48  6.880e-02  6.881e-02  6.879e-02  5.375e-02  5.375e-02  5.375e-02  1.271e-01  6.091e-02  3.490e-01  5.400e-02  5.700e-02 
 OH72R107  0.6841938     3.6  22298.78   0.70  532  1   3.824e-01   1.912e-01   1.912e-01  33   64  6.277e-02  6.279e-02  6.276e-02  4.762e-02  4.762e-02  4.762e-02  1.226e-01  5.429e-02  3.570e-01  4.700e-02  5.400e-02 
 OH72R108  0.6852682     6.4  22515.85   0.91  532  1   2.657e-01   1.329e-01   1.329e-01  33   72  5.871e-02  5.872e-02  5.869e-02  4.389e-02  4.389e-02  4.389e-02  1.183e-01  5.007e-02  3.550e-01  4.200e-02  5.200e-02 
 OH72R109  0.6866830     9.7  22758.27   1.15  532  1   2.132e-01   1.066e-01   1.066e-01  33   80  5.432e-02  5.434e-02  5.431e-02  4.002e-02  4.002e-02  4.002e-02  1.134e-01  4.560e-02  3.500e-01  3.800e-02  5.000e-02 
 OH72R111  0.6905645    18.3  23317.94   1.67  532  2   1.448e-01   7.564e-02   6.915e-02  10   96  4.514e-02  4.515e-02  4.513e-02  3.229e-02  3.229e-02  3.229e-02  1.024e-01  3.651e-02  3.360e-01  2.900e-02  4.500e-02 
 OH72R112  0.6930483    23.5  23634.41   1.96  533  2   1.145e-01   6.466e-02   4.982e-02  10  104  4.050e-02  4.052e-02  4.049e-02  2.855e-02  2.855e-02  2.855e-02  9.661e-02  3.207e-02  3.270e-01  2.400e-02  4.300e-02 
 OH72R114  0.6991521    35.9  24338.32   2.57  532  2   7.188e-02   4.427e-02   2.762e-02  30  120  3.142e-02  3.143e-02  3.141e-02  2.151e-02  2.205e-02  2.093e-02  8.476e-02  2.369e-02  3.070e-01  1.600e-02  3.800e-02 
 OH72R202  0.6843834    -0.7  21710.59   0.09  533  1   2.842e+00   1.421e+00   1.421e+00  33   16  6.571e-02  6.571e-02  6.572e-02  5.366e-02  5.366e-02  5.366e-02  1.116e-01  5.968e-02  2.780e-01  5.200e-02  5.200e-02 
 OH72R203  0.6835895     1.0  21783.82   0.10  532  1   2.787e+00   1.393e+00   1.393e+00  33   24  7.428e-02  7.427e-02  7.429e-02  5.976e-02  5.976e-02  5.976e-02  1.292e-01  6.702e-02  3.310e-01  5.800e-02  6.000e-02 
 OH72R204  0.6831807     2.3  21885.71   0.08  532  1   1.725e+00   8.623e-01   8.623e-01  33   32  7.464e-02  7.463e-02  7.465e-02  5.918e-02  5.918e-02  5.918e-02  1.331e-01  6.681e-02  3.510e-01  5.800e-02  6.100e-02 
 OH72R207  0.6841542     2.3  22358.45  -0.16  532  1   2.427e-01   1.214e-01   1.214e-01  33   56  6.453e-02  6.452e-02  6.454e-02  4.895e-02  4.895e-02  4.895e-02  1.251e-01  5.591e-02  3.630e-01  4.700e-02  5.500e-02 
 OH72R208  0.6851901     1.2  22570.11  -0.30  532  1   1.837e-01   9.184e-02   9.184e-02  33   64  6.002e-02  6.001e-02  6.003e-02  4.487e-02  4.487e-02  4.487e-02  1.202e-01  5.128e-02  3.590e-01  4.300e-02  5.300e-02 
 OH72R211  0.6904346    -5.7  23360.65  -0.85  533  1   1.078e-01   5.391e-02   5.391e-02  33   88  4.577e-02  4.576e-02  4.578e-02  3.274e-02  3.274e-02  3.274e-02  1.033e-01  3.709e-02  3.400e-01  2.900e-02  4.600e-02 
 OH72R212  0.6929117    -9.1  23674.35  -1.08  533  1   8.850e-02   4.425e-02   4.425e-02  30   96  4.102e-02  4.101e-02  4.103e-02  2.891e-02  2.891e-02  2.891e-02  9.735e-02  3.254e-02  3.320e-01  2.400e-02  4.300e-02 
 OH73P101  0.8888288     5.2  21536.21   0.01  529  1   1.905e+02   9.527e+01   9.527e+01  33   16  1.036e+00  1.036e+00  1.036e+00  1.091e+00  1.091e+00  1.091e+00  1.595e+00  9.376e-01  2.964e+00  8.770e-01  1.205e+00 
 OH73P102  0.8922083    10.1  21599.13   0.05  531  1   2.225e+02   1.112e+02   1.112e+02  33   24  1.272e+00  1.272e+00  1.272e+00  1.340e+00  1.340e+00  1.340e+00  1.936e+00  1.152e+00  3.543e+00  1.083e+00  1.461e+00 
 OH73P103  0.8960544    16.1  21687.55   0.12  531  1   1.686e+02   8.430e+01   8.430e+01  33   32  1.375e+00  1.374e+00  1.375e+00  1.450e+00  1.450e+00  1.450e+00  2.070e+00  1.247e+00  3.732e+00  1.178e+00  1.561e+00 
 OH73P104  0.9003819    23.0  21801.66   0.22  531  2   9.630e+01   4.866e+01   4.764e+01  33   40  1.438e+00  1.438e+00  1.438e+00  1.519e+00  1.527e+00  1.512e+00  2.145e+00  1.306e+00  3.806e+00  1.238e+00  1.615e+00 
 OH73P105  0.9052026    30.5  21941.57   0.35  530  2   4.608e+01   2.346e+01   2.263e+01  33   48  1.486e+00  1.486e+00  1.486e+00  1.572e+00  1.607e+00  1.537e+00  2.194e+00  1.351e+00  3.835e+00  1.286e+00  1.651e+00 
 OH73P106  0.9105272    38.8  22107.31   0.51  530  2   2.177e+01   1.140e+01   1.037e+01  33   56  1.525e+00  1.526e+00  1.525e+00  1.616e+00  1.680e+00  1.552e+00  2.230e+00  1.388e+00  3.841e+00  1.325e+00  1.678e+00 
 OH73P107  0.9163674    47.7  22298.78   0.70  530  2   1.249e+01   6.612e+00   5.875e+00  33   64  1.560e+00  1.560e+00  1.560e+00  1.654e+00  1.748e+00  1.560e+00  2.260e+00  1.420e+00  3.834e+00  1.360e+00  1.700e+00 
 OH73P108  0.9227362    57.4  22515.85   0.91  531  2   9.524e+00   5.285e+00   4.239e+00  22   72  1.590e+00  1.591e+00  1.590e+00  1.689e+00  1.814e+00  1.563e+00  2.283e+00  1.448e+00  3.817e+00  1.392e+00  1.718e+00 
 OH73P109  0.9296489    67.9  22758.27   1.15  529  2   8.468e+00   4.565e+00   3.902e+00  33   80  1.618e+00  1.618e+00  1.618e+00  1.721e+00  1.877e+00  1.562e+00  2.305e+00  1.472e+00  3.792e+00  1.421e+00  1.734e+00 
 OH73P110  0.9371230    79.2  23025.75   1.40  530  2   1.041e+01   4.512e+00   5.902e+00  11   88  1.642e+00  1.643e+00  1.642e+00  1.749e+00  1.937e+00  1.557e+00  2.322e+00  1.494e+00  3.762e+00  1.446e+00  1.746e+00 
 OH73P111  0.9451784    91.5  23317.94   1.67  528  2   1.122e+01   7.441e+00   3.784e+00  22   96  1.664e+00  1.665e+00  1.664e+00  1.775e+00  1.995e+00  1.549e+00  2.335e+00  1.513e+00  3.728e+00  1.469e+00  1.756e+00 
 OH73P112  0.9538380   104.8  23634.41   1.96  300  2   1.051e+01   4.196e+00   6.318e+00  11  104  1.684e+00  1.684e+00  1.683e+00  1.798e+00  2.050e+00  1.538e+00  2.345e+00  1.529e+00  3.688e+00  1.490e+00  1.764e+00 
 OH73P113  0.9631271   119.2  23974.70   2.26  299  2   6.045e+00   3.353e+00   2.692e+00  33  112  1.701e+00  1.701e+00  1.700e+00  1.818e+00  2.103e+00  1.524e+00  2.353e+00  1.543e+00  3.650e+00  1.507e+00  1.770e+00 
 OH73P114  0.9730749   134.8  24338.32   2.57  300  2   4.607e+00   2.533e+00   2.074e+00  33  120  1.715e+00  1.716e+00  1.714e+00  1.836e+00  2.153e+00  1.507e+00  2.358e+00  1.554e+00  3.600e+00  1.522e+00  1.775e+00 
 OH73P115  0.9837134   151.7  24724.70   2.89  300  2   3.453e+00   2.087e+00   1.367e+00  30  128  1.727e+00  1.728e+00  1.726e+00  1.851e+00  2.200e+00  1.487e+00  2.360e+00  1.562e+00  1.000e+16  1.534e+00  1.778e+00 
 OH73P118  1.0201598   211.5  26014.20   3.89  299  2   4.320e+00   1.545e+00   2.775e+00  10  152  1.747e+00  1.749e+00  1.746e+00  1.881e+00  2.321e+00  1.414e+00  2.356e+00  1.574e+00  1.000e+16  1.000e+16  1.000e+16 
 OH73P202  0.8905561     3.0  21710.59   0.09  529  1   7.901e+01   3.950e+01   3.950e+01  33   16  1.533e+00  1.533e+00  1.533e+00  1.615e+00  1.615e+00  1.615e+00  2.347e+00  1.387e+00  4.345e+00  1.336e+00  1.773e+00 
 OH73P203  0.8945852    -0.4  21783.82   0.10  530  1   6.893e+01   3.446e+01   3.446e+01  33   24  1.514e+00  1.513e+00  1.514e+00  1.597e+00  1.597e+00  1.597e+00  2.289e+00  1.372e+00  4.167e+00  1.320e+00  1.727e+00 
 OH73P204  0.8990833    -5.0  21885.71   0.08  530  1   4.465e+01   2.233e+01   2.233e+01  33   32  1.522e+00  1.521e+00  1.522e+00  1.607e+00  1.607e+00  1.607e+00  2.276e+00  1.381e+00  4.072e+00  1.328e+00  1.715e+00 
 OH73P205  0.9040536   -10.3  22015.77   0.03  530  1   2.526e+01   1.263e+01   1.263e+01  33   40  1.540e+00  1.540e+00  1.540e+00  1.629e+00  1.629e+00  1.629e+00  2.279e+00  1.400e+00  4.011e+00  1.347e+00  1.717e+00 
 OH73P207  0.9154521   -23.0  22358.45  -0.16  530  2   8.233e+00   3.894e+00   4.339e+00  11   56  1.587e+00  1.587e+00  1.588e+00  1.684e+00  1.588e+00  1.779e+00  2.303e+00  1.444e+00  3.923e+00  1.394e+00  1.733e+00 
 OH73P208  0.9219098   -30.3  22570.11  -0.30  529  2   7.710e+00   3.382e+00   4.329e+00  33   64  1.611e+00  1.611e+00  1.611e+00  1.711e+00  1.584e+00  1.838e+00  2.317e+00  1.466e+00  3.883e+00  1.418e+00  1.743e+00 
 OH73P209  0.9288966   -38.2  22808.02  -0.46  529  2   6.286e+00   2.790e+00   3.496e+00  33   72  1.634e+00  1.634e+00  1.634e+00  1.738e+00  1.578e+00  1.896e+00  2.330e+00  1.487e+00  3.843e+00  1.442e+00  1.753e+00 
 OH73P210  0.9364326   -46.9  23071.70  -0.65  530  2   5.961e+00   2.632e+00   3.330e+00  33   80  1.656e+00  1.655e+00  1.656e+00  1.763e+00  1.571e+00  1.954e+00  2.342e+00  1.506e+00  3.801e+00  1.464e+00  1.762e+00 
 OH73P212  0.9532433   -66.7  23674.35  -1.08  300  2   5.790e+00   2.505e+00   3.286e+00  33   96  1.693e+00  1.693e+00  1.693e+00  1.808e+00  1.548e+00  2.063e+00  2.359e+00  1.538e+00  3.710e+00  1.502e+00  1.775e+00 
 OH73P213  0.9625694   -77.9  24012.26  -1.32  299  2   3.849e+00   1.554e+00   2.295e+00  30  104  1.708e+00  1.708e+00  1.709e+00  1.827e+00  1.532e+00  2.115e+00  2.365e+00  1.550e+00  3.662e+00  1.518e+00  1.779e+00 
 OH73P214  0.9725484   -90.2  24373.79  -1.57  299  2   3.323e+00   1.474e+00   1.849e+00  33  112  1.722e+00  1.721e+00  1.722e+00  1.843e+00  1.514e+00  2.165e+00  2.368e+00  1.560e+00  3.611e+00  1.532e+00  1.783e+00 
 OH73P215  0.9832135  -103.5  24758.35  -1.84  300  2   2.370e+00   9.493e-01   1.420e+00  10  120  1.733e+00  1.732e+00  1.733e+00  1.858e+00  1.494e+00  2.211e+00  2.370e+00  1.568e+00  3.558e+00  1.543e+00  1.785e+00 
 OH73P216  0.9946015  -117.9  25165.29  -2.11  300  2   4.804e+01   1.497e+00   4.655e+01  01  128  1.742e+00  1.741e+00  1.742e+00  1.869e+00  1.472e+00  2.255e+00  2.369e+00  1.573e+00  1.000e+16  1.551e+00  1.787e+00 
 OH73P217  1.0067538  -133.7  25593.94  -2.40  299  2   5.046e+00   1.323e+00   3.723e+00  10  136  1.748e+00  1.747e+00  1.748e+00  1.879e+00  1.447e+00  2.295e+00  2.367e+00  1.577e+00  1.000e+16  1.000e+16  1.000e+16 
 OH73Q101  0.8829518    -2.8  21536.21   0.01  530  1   2.459e+02   1.229e+02   1.229e+02  33   16  1.380e+00  1.380e+00  1.380e+00  1.396e+00  1.396e+00  1.396e+00  2.188e+00  1.241e+00  4.224e+00  1.177e+00  1.659e+00 
 OH73Q102  0.8838863   -10.3  21599.13   0.05  531  1   9.294e+01   4.647e+01   4.647e+01  33   24  5.662e-01  5.663e-01  5.661e-01  5.258e-01  5.258e-01  5.258e-01  8.980e-01  5.084e-01  1.734e+00  4.840e-01  6.820e-01 
 OH73Q103  0.8852249   -23.5  21687.55   0.12  530  2   3.060e+01   1.511e+01   1.549e+01  33   32  2.995e-01  2.995e-01  2.994e-01  2.552e-01  2.542e-01  2.562e-01  4.751e-01  2.685e-01  9.160e-01  2.570e-01  3.610e-01 
 OH73Q104  0.8869849   -42.8  21801.66   0.22  530  2   9.959e+00   5.261e+00   4.699e+00  22   40  1.813e-01  1.814e-01  1.812e-01  1.418e-01  1.366e-01  1.470e-01  2.876e-01  1.624e-01  5.540e-01  1.560e-01  2.190e-01 
 OH73Q105  0.8891803   -67.8  21941.57   0.35  530  2   2.505e+00   1.225e+00   1.280e+00  33   48  1.198e-01  1.198e-01  1.197e-01  8.595e-02  8.001e-02  9.191e-02  1.899e-01  1.072e-01  3.650e-01  1.040e-01  1.450e-01 
 OH73Q106  0.8918233   -98.6  22107.31   0.51  528  2   7.002e-01   3.097e-01   3.905e-01  33   56  8.413e-02  8.418e-02  8.408e-02  5.541e-02  4.980e-02  6.106e-02  1.332e-01  7.525e-02  2.550e-01  7.300e-02  1.020e-01 
 OH73Q108  0.8984952  -176.1  22515.85   0.91  529  2   7.724e-02   5.344e-02   2.380e-02  11   72  4.728e-02  4.731e-02  4.724e-02  2.622e-02  2.190e-02  3.060e-02  7.474e-02  4.224e-02  1.420e-01  4.100e-02  5.800e-02 
 OH73Q109  0.9025470  -222.7  22758.27   1.15  528  2   2.736e-01   3.725e-02   2.363e-01  01   80  3.718e-02  3.721e-02  3.715e-02  1.892e-02  1.521e-02  2.270e-02  5.868e-02  3.320e-02  1.100e-01  3.300e-02  4.600e-02 
 OH73Q201  0.8827874    -9.2  21666.44   0.05  530  1   2.726e+01   1.363e+01   1.363e+01  33    8  7.906e-01  7.906e-01  7.907e-01  8.002e-01  8.002e-01  8.002e-01  1.253e+00  7.117e-01  2.148e+00  6.740e-01  9.500e-01 
 OH73Q203  0.8847857   -17.4  21783.82   0.10  530  1   3.021e+00   1.510e+00   1.510e+00  33   24  8.301e-02  8.303e-02  8.300e-02  7.075e-02  7.075e-02  7.075e-02  1.312e-01  7.513e-02  2.520e-01  7.100e-02  1.000e-01 
 OH73Q205  0.8886915    -3.7  22015.77   0.03  529  1   3.246e-01   1.623e-01   1.623e-01  33   40  3.735e-02  3.738e-02  3.732e-02  2.680e-02  2.680e-02  2.680e-02  5.882e-02  3.388e-02  1.120e-01  3.200e-02  4.500e-02 
 OH73R102  0.8780742    -2.4  21599.13   0.05  529  1   9.830e+01   4.915e+01   4.915e+01  33   24  5.785e-01  5.786e-01  5.785e-01  6.045e-01  6.045e-01  6.045e-01  9.485e-01  5.179e-01  1.906e+00  4.980e-01  7.230e-01 
 OH73R103  0.8770320    -3.2  21687.55   0.12  530  1   8.763e+01   4.382e+01   4.382e+01  33   32  7.397e-01  7.398e-01  7.396e-01  7.719e-01  7.719e-01  7.719e-01  1.231e+00  6.601e-01  2.516e+00  6.330e-01  9.410e-01 
 OH73R105  0.8761121    -2.4  21941.57   0.35  530  1   2.415e+01   1.208e+01   1.208e+01  33   48  7.908e-01  7.909e-01  7.907e-01  8.230e-01  8.230e-01  8.230e-01  1.360e+00  7.002e-01  2.877e+00  6.700e-01  1.048e+00 
 OH73R106  0.8762670    -0.7  22107.31   0.51  529  1   1.071e+01   5.356e+00   5.356e+00  33   56  7.726e-01  7.727e-01  7.725e-01  8.030e-01  8.030e-01  8.030e-01  1.354e+00  6.811e-01  2.912e+00  6.520e-01  1.048e+00 
 OH73R110  0.8812719    14.4  23025.75   1.40  529  1   2.997e+00   1.498e+00   1.498e+00  33   88  6.237e-01  6.238e-01  6.236e-01  6.448e-01  6.448e-01  6.448e-01  1.193e+00  5.364e-01  2.748e+00  5.190e-01  9.510e-01 
 OH73R111  0.8836724    20.2  23317.94   1.67  530  1   2.799e+00   1.399e+00   1.399e+00  33   96  5.798e-01  5.800e-01  5.797e-01  5.986e-01  5.986e-01  5.986e-01  1.138e+00  4.946e-01  2.667e+00  4.810e-01  9.160e-01 
 OH73R112  0.8865555    26.9  23634.41   1.96  529  2   2.737e+00   1.731e+00   1.006e+00  22  104  5.355e-01  5.356e-01  5.353e-01  5.521e-01  5.521e-01  5.521e-01  1.081e+00  4.525e-01  2.576e+00  4.420e-01  8.800e-01 
 OH73R113  0.8899345    34.5  23974.70   2.26  529  2   1.714e+00   9.351e-01   7.785e-01  33  112  4.912e-01  4.913e-01  4.910e-01  5.058e-01  5.102e-01  5.012e-01  1.022e+00  4.107e-01  2.477e+00  4.040e-01  8.420e-01 
 OH73R114  0.8938248    43.0  24338.32   2.57  529  2   1.293e+00   5.264e-01   7.664e-01  33  120  4.474e-01  4.475e-01  4.472e-01  4.600e-01  4.718e-01  4.478e-01  9.620e-01  3.697e-01  2.370e+00  3.660e-01  8.050e-01 
 OH73R115  0.8982436    52.5  24724.70   2.89  530  2   6.890e-01   6.830e-01   5.996e-03  11  128  4.044e-01  4.045e-01  4.042e-01  4.153e-01  4.328e-01  3.969e-01  9.015e-01  3.297e-01  1.000e+16  3.290e-01  7.670e-01 
 OH73R116  0.9032102    63.1  25133.24   3.22  528  2   6.710e-01   4.054e-01   2.655e-01  30  136  3.625e-01  3.626e-01  3.623e-01  3.717e-01  3.936e-01  3.487e-01  8.406e-01  2.912e-01  1.000e+16  1.000e+16  1.000e+16 
 OH73R117  0.9087468    74.9  25563.30   3.56  530  2   6.490e-01   2.158e-01   4.332e-01  10  144  3.219e-01  3.220e-01  3.217e-01  3.297e-01  3.545e-01  3.035e-01  7.800e-01  2.544e-01  1.000e+16  1.000e+16  1.000e+16 
 OH73R118  0.9148782    87.9  26014.20   3.89  529  2   3.062e-01   1.629e-01   1.433e-01  10  152  2.828e-01  2.829e-01  2.827e-01  2.893e-01  3.158e-01  2.611e-01  7.196e-01  2.195e-01  1.000e+16  1.000e+16  1.000e+16 
 OH73R202  0.8793602    -1.4  21710.59   0.09  530  1   3.860e+01   1.930e+01   1.930e+01  33   16  7.231e-01  7.230e-01  7.231e-01  7.555e-01  7.555e-01  7.555e-01  1.173e+00  6.476e-01  2.326e+00  6.000e-01  8.930e-01 
 OH73R203  0.8778620     1.2  21783.82   0.10  530  1   4.179e+01   2.090e+01   2.090e+01  33   24  8.276e-01  8.274e-01  8.277e-01  8.636e-01  8.636e-01  8.636e-01  1.365e+00  7.388e-01  2.759e+00  6.870e-01  1.042e+00 
 OH73R209  0.8792647     2.0  22808.02  -0.46  529  1   2.405e+00   1.203e+00   1.203e+00  33   72  6.768e-01  6.767e-01  6.769e-01  7.006e-01  7.006e-01  7.006e-01  1.259e+00  5.868e-01  2.856e+00  5.590e-01  9.930e-01 
 OH73R210  0.8811627    -0.6  23071.70  -0.65  529  1   2.261e+00   1.130e+00   1.130e+00  33   80  6.319e-01  6.318e-01  6.320e-01  6.533e-01  6.533e-01  6.533e-01  1.205e+00  5.439e-01  2.784e+00  5.200e-01  9.600e-01 
 OH73R212  0.8864087    -8.3  23674.35  -1.08  529  1   1.685e+00   8.424e-01   8.424e-01  33   96  5.409e-01  5.408e-01  5.410e-01  5.577e-01  5.577e-01  5.577e-01  1.089e+00  4.575e-01  2.611e+00  4.430e-01  8.850e-01 
 OH73R213  0.8897770   -13.3  24012.26  -1.32  530  1   1.288e+00   6.438e-01   6.438e-01  33  104  4.956e-01  4.955e-01  4.957e-01  5.103e-01  5.058e-01  5.148e-01  1.029e+00  4.148e-01  2.512e+00  4.040e-01  8.470e-01 
 OH73R214  0.8936597   -19.2  24373.79  -1.57  528  1   7.392e-01   3.696e-01   3.696e-01  30  112  4.511e-01  4.510e-01  4.512e-01  4.639e-01  4.516e-01  4.758e-01  9.679e-01  3.731e-01  2.406e+00  3.660e-01  8.090e-01 
 OH73R215  0.8980730   -25.9  24758.35  -1.84  530  2   6.893e-01   2.481e-01   4.412e-01  11  120  4.075e-01  4.074e-01  4.076e-01  4.185e-01  4.001e-01  4.363e-01  9.063e-01  3.327e-01  2.295e+00  3.290e-01  7.710e-01 
 OH73R216  0.9030356   -33.5  25165.29  -2.11  528  2   8.856e-01   5.479e-01   3.377e-01  22  128  3.651e-01  3.650e-01  3.652e-01  3.745e-01  3.515e-01  3.967e-01  8.451e-01  2.937e-01  1.000e+16  2.930e-01  7.330e-01 
 OH73R217  0.9085691   -42.2  25593.94  -2.40  528  2   4.108e-01   1.900e-01   2.207e-01  30  136  3.241e-01  3.241e-01  3.242e-01  3.320e-01  3.058e-01  3.573e-01  7.834e-01  2.565e-01  1.000e+16  1.000e+16  1.000e+16 
 OH73R218  0.9146979   -51.8  26043.58  -2.69  529  2   2.214e-01   1.107e-01   1.107e-01  30  144  2.848e-01  2.847e-01  2.848e-01  2.913e-01  2.632e-01  3.182e-01  7.229e-01  2.213e-01  1.000e+16  1.000e+16  1.000e+16 
 OH73R219  0.9214498   -62.6  26513.49  -2.98  529  2   1.834e-01   7.554e-02   1.079e-01  02  152  2.471e-01  2.470e-01  2.472e-01  2.524e-01  2.237e-01  2.799e-01  6.630e-01  1.884e-01  1.000e+16  1.000e+16  1.000e+16 
 OH82P101  0.5916940     2.6  23949.83   0.01  231  1   3.098e+00   1.549e+00   1.549e+00  33   16  1.919e-02  1.919e-02  1.919e-02  1.964e-02  1.964e-02  1.964e-02  3.729e-02  2.108e-02  9.400e-02  1.000e+16  1.000e+16 
 OH82P102  0.5934506     5.2  24009.56   0.05  231  1   3.790e+00   1.895e+00   1.895e+00  33   24  2.418e-02  2.417e-02  2.418e-02  2.528e-02  2.528e-02  2.528e-02  4.557e-02  2.642e-02  1.120e-01  1.000e+16  1.000e+16 
 OH82P103  0.5955071     8.5  24093.46   0.11  231  1   3.085e+00   1.543e+00   1.543e+00  33   32  2.685e-02  2.685e-02  2.685e-02  2.869e-02  2.869e-02  2.869e-02  4.908e-02  2.917e-02  1.180e-01  1.000e+16  1.000e+16 
 OH82P104  0.5978734    12.4  24201.66   0.20  231  1   1.952e+00   9.761e-01   9.761e-01  33   40  2.889e-02  2.889e-02  2.889e-02  3.153e-02  3.169e-02  3.137e-02  5.117e-02  3.115e-02  1.200e-01  1.000e+16  1.000e+16 
 OH82P105  0.6005576    16.8  24334.24   0.31  231  2   1.060e+00   5.501e-01   5.100e-01  33   48  3.070e-02  3.070e-02  3.070e-02  3.423e-02  3.500e-02  3.347e-02  5.273e-02  3.283e-02  1.200e-01  1.000e+16  1.000e+16 
 OH82P106  0.6035672    21.6  24491.19   0.46  231  2   5.208e-01   2.822e-01   2.386e-01  33   56  3.243e-02  3.243e-02  3.243e-02  3.694e-02  3.840e-02  3.547e-02  5.398e-02  3.436e-02  1.200e-01  1.000e+16  1.000e+16 
 OH82P107  0.6069099    26.9  24672.42   0.62  231  2   3.298e-01   1.603e-01   1.695e-01  33   64  3.412e-02  3.412e-02  3.412e-02  3.971e-02  4.196e-02  3.743e-02  5.506e-02  3.578e-02  1.200e-01  1.000e+16  1.000e+16 
 OH82P108  0.6105942    32.7  24877.77   0.81  231  2   2.218e-01   1.152e-01   1.066e-01  03   72  3.579e-02  3.579e-02  3.579e-02  4.255e-02  4.569e-02  3.937e-02  5.599e-02  3.712e-02  1.200e-01  1.000e+16  1.000e+16 
 OH82P109  0.6146300    39.1  25106.98   1.02  231  2   1.281e-01   6.905e-02   5.909e-02  22   80  3.745e-02  3.745e-02  3.744e-02  4.548e-02  4.961e-02  4.129e-02  5.686e-02  3.839e-02  1.190e-01  1.000e+16  1.000e+16 
 OH82P110  0.6190282    46.0  25359.75   1.25  231  2   1.254e-01   7.867e-02   4.674e-02  30   88  3.908e-02  3.909e-02  3.908e-02  4.850e-02  5.371e-02  4.318e-02  5.761e-02  3.958e-02  1.180e-01  1.000e+16  1.000e+16 
 OH82P112  0.6289645    61.7  25934.43   1.75  231  2   1.913e-01   1.494e-01   4.185e-02  20  104  4.224e-02  4.225e-02  4.223e-02  5.470e-02  6.240e-02  4.680e-02  5.895e-02  4.176e-02  1.170e-01  1.000e+16  1.000e+16 
 OH82P113  0.6345331    70.6  26255.43   2.01  230  2   6.489e-02   5.071e-02   1.417e-02  10  112  4.372e-02  4.373e-02  4.371e-02  5.785e-02  6.693e-02  4.848e-02  5.954e-02  4.275e-02  1.160e-01  1.000e+16  1.000e+16 
 OH82P114  0.6405258    80.4  26598.20   2.29  231  2   4.150e-02   1.883e-02   2.267e-02  30  120  4.511e-02  4.512e-02  4.509e-02  6.097e-02  7.152e-02  5.004e-02  6.008e-02  4.367e-02  1.150e-01  1.000e+16  1.000e+16 
 OH82P201  0.5908338     2.6  24080.40   0.04  231  1   8.995e-01   4.497e-01   4.497e-01  33    8  2.988e-02  2.988e-02  2.989e-02  3.059e-02  3.059e-02  3.059e-02  5.920e-02  3.286e-02  1.520e-01  1.000e+16  1.000e+16 
 OH82P202  0.5926366     1.8  24122.04   0.08  231  1   1.335e+00   6.674e-01   6.674e-01  33   16  2.878e-02  2.877e-02  2.878e-02  3.010e-02  3.010e-02  3.010e-02  5.507e-02  3.149e-02  1.370e-01  1.000e+16  1.000e+16 
 OH82P203  0.5947580     0.2  24191.15   0.09  230  1   1.220e+00   6.098e-01   6.098e-01  33   24  2.927e-02  2.926e-02  2.927e-02  3.127e-02  3.127e-02  3.127e-02  5.413e-02  3.183e-02  1.310e-01  1.000e+16  1.000e+16 
 OH82P204  0.5971931    -2.1  24287.32   0.07  231  1   9.089e-01   4.545e-01   4.545e-01  33   32  3.031e-02  3.030e-02  3.032e-02  3.308e-02  3.308e-02  3.308e-02  5.421e-02  3.273e-02  1.280e-01  1.000e+16  1.000e+16 
 OH82P205  0.5999425    -5.0  24410.12   0.03  231  1   4.919e-01   2.460e-01   2.460e-01  33   40  3.161e-02  3.160e-02  3.161e-02  3.524e-02  3.524e-02  3.524e-02  5.469e-02  3.384e-02  1.260e-01  1.000e+16  1.000e+16 
 OH82P206  0.6030103    -8.3  24559.08  -0.05  231  1   3.064e-01   1.532e-01   1.532e-01  33   48  3.304e-02  3.304e-02  3.305e-02  3.764e-02  3.615e-02  3.913e-02  5.534e-02  3.505e-02  1.240e-01  1.000e+16  1.000e+16 
 OH82P207  0.6064036   -12.1  24733.74  -0.15  231  1   2.149e-01   1.075e-01   1.075e-01  33   56  3.456e-02  3.455e-02  3.456e-02  4.022e-02  3.792e-02  4.250e-02  5.603e-02  3.628e-02  1.230e-01  1.000e+16  1.000e+16 
 OH82P208  0.6101313   -16.2  24933.62  -0.27  231  2   1.480e-01   6.489e-02   8.313e-02  13   64  3.612e-02  3.611e-02  3.612e-02  4.294e-02  3.975e-02  4.612e-02  5.673e-02  3.750e-02  1.210e-01  1.000e+16  1.000e+16 
 OH82P209  0.6142040   -20.9  25158.26  -0.42  231  2   1.826e-01   8.300e-02   9.963e-02  03   72  3.770e-02  3.770e-02  3.771e-02  4.579e-02  4.159e-02  4.997e-02  5.742e-02  3.869e-02  1.200e-01  1.000e+16  1.000e+16 
 OH82P210  0.6186336   -26.0  25407.16  -0.59  231  2   1.626e-01   4.729e-02   1.153e-01  11   80  3.929e-02  3.928e-02  3.929e-02  4.875e-02  4.343e-02  5.402e-02  5.807e-02  3.983e-02  1.190e-01  1.000e+16  1.000e+16 
 OH82P211  0.6234338   -31.7  25679.82  -0.77  231  2   8.596e-02   2.892e-02   5.704e-02  03   88  4.086e-02  4.085e-02  4.086e-02  5.179e-02  4.524e-02  5.827e-02  5.869e-02  4.091e-02  1.180e-01  1.000e+16  1.000e+16 
 OH82P212  0.6286194   -37.9  25975.70  -0.97  231  2   7.792e-02   3.763e-02   4.030e-02  30   96  4.239e-02  4.238e-02  4.239e-02  5.489e-02  4.700e-02  6.267e-02  5.926e-02  4.194e-02  1.170e-01  1.000e+16  1.000e+16 
 OH82P213  0.6342075   -44.7  26294.25  -1.19  231  2   6.606e-02   3.734e-02   2.873e-02  30  104  4.385e-02  4.384e-02  4.386e-02  5.801e-02  4.867e-02  6.719e-02  5.982e-02  4.290e-02  1.160e-01  1.000e+16  1.000e+16 
 OH82Q101  0.5889815    -1.2  23949.83   0.01  231  1   3.361e+00   1.681e+00   1.681e+00  33   16  2.404e-02  2.404e-02  2.404e-02  2.308e-02  2.308e-02  2.308e-02  5.020e-02  2.653e-02  1.360e-01  1.000e+16  1.000e+16 
 OH82Q102  0.5896101    -4.6  24009.56   0.05  231  1   1.139e+00   5.694e-01   5.694e-01  33   24  9.910e-03  9.913e-03  9.908e-03  7.813e-03  7.813e-03  7.813e-03  2.059e-02  1.088e-02  5.600e-02  1.000e+16  1.000e+16 
 OH82Q103  0.5905106   -10.5  24093.46   0.11  231  1   3.547e-01   1.774e-01   1.774e-01  33   32  5.278e-03  5.281e-03  5.275e-03  3.418e-03  3.404e-03  3.431e-03  1.089e-02  5.757e-03  3.000e-02  1.000e+16  1.000e+16 
 OH82Q201  0.5888762    -4.0  24080.40   0.04  231  1   3.858e-01   1.929e-01   1.929e-01  33    8  1.379e-02  1.379e-02  1.379e-02  1.324e-02  1.324e-02  1.324e-02  2.876e-02  1.524e-02  7.800e-02  1.000e+16  1.000e+16 
 OH82Q204  0.5913753    -5.7  24287.32   0.07  231  1   1.830e-02   9.149e-03   9.149e-03  03   32  9.293e-04  9.299e-04  9.286e-04  4.942e-04  4.942e-04  4.942e-04  1.884e-03  1.017e-03  5.000e-03  1.000e+16  1.000e+16 
 OH82R102  0.5869166    -0.8  24009.56   0.05  231  1   1.321e+00   6.605e-01   6.605e-01  33   24  9.410e-03  9.411e-03  9.409e-03  8.911e-03  8.911e-03  8.911e-03  2.126e-02  1.043e-02  6.200e-02  1.000e+16  1.000e+16 
 OH82R103  0.5867080    -0.7  24093.46   0.11  231  1   1.169e+00   5.843e-01   5.843e-01  33   32  1.169e-02  1.170e-02  1.169e-02  1.084e-02  1.084e-02  1.084e-02  2.726e-02  1.293e-02  8.200e-02  1.000e+16  1.000e+16 
 OH82R104  0.5867617    -0.0  24201.66   0.20  231  1   6.744e-01   3.372e-01   3.372e-01  33   40  1.209e-02  1.209e-02  1.209e-02  1.097e-02  1.097e-02  1.097e-02  2.911e-02  1.330e-02  9.100e-02  1.000e+16  1.000e+16 
 OH82R106  0.5877001     3.0  24491.19   0.46  231  1   1.262e-01   6.309e-02   6.309e-02  30   56  1.117e-02  1.117e-02  1.116e-02  9.707e-03  9.707e-03  9.707e-03  2.876e-02  1.205e-02  9.800e-02  1.000e+16  1.000e+16 
 OH82R107  0.5886030     5.3  24672.42   0.62  231  1   6.901e-02   3.451e-02   3.451e-02  03   64  1.041e-02  1.041e-02  1.040e-02  8.855e-03  8.855e-03  8.855e-03  2.778e-02  1.106e-02  9.800e-02  1.000e+16  1.000e+16 
 OH82R202  0.5874356    -0.2  24122.04   0.08  231  1   4.923e-01   2.461e-01   2.461e-01  33   16  1.203e-02  1.203e-02  1.203e-02  1.139e-02  1.139e-02  1.139e-02  2.652e-02  1.330e-02  7.600e-02  1.000e+16  1.000e+16 
 OH82R203  0.5869928     1.1  24191.15   0.09  231  1   4.844e-01   2.422e-01   2.422e-01  33   24  1.333e-02  1.333e-02  1.333e-02  1.236e-02  1.236e-02  1.236e-02  3.046e-02  1.472e-02  9.000e-02  1.000e+16  1.000e+16 
 OH82R204  0.5868880     2.0  24287.32   0.07  231  1   2.961e-01   1.480e-01   1.480e-01  30   32  1.314e-02  1.314e-02  1.314e-02  1.192e-02  1.192e-02  1.192e-02  3.112e-02  1.445e-02  9.600e-02  1.000e+16  1.000e+16 
 OH82R206  0.5876558     2.0  24559.08  -0.05  231  1   9.629e-02   4.815e-02   4.815e-02  03   48  1.166e-02  1.166e-02  1.166e-02  1.014e-02  1.014e-02  1.014e-02  2.968e-02  1.260e-02  1.000e-01  1.000e+16  1.000e+16 
 OH82R207  0.5885163     1.2  24733.74  -0.15  231  1   4.544e-02   2.272e-02   2.272e-02  03   56  1.076e-02  1.076e-02  1.076e-02  9.157e-03  9.157e-03  9.157e-03  2.844e-02  1.146e-02  1.000e-01  1.000e+16  1.000e+16 
 OH82R208  0.5896921    -0.1  24933.62  -0.27  231  1   2.445e-02   1.222e-02   1.222e-02  03   64  9.844e-03  9.842e-03  9.846e-03  8.200e-03  8.200e-03  8.200e-03  2.704e-02  1.029e-02  1.000e-01  1.000e+16  1.000e+16 
 OH83P101  0.7318299     3.6  23949.83   0.01  532  1   3.681e+01   1.841e+01   1.841e+01  33   16  2.383e-01  2.383e-01  2.383e-01  2.577e-01  2.577e-01  2.577e-01  3.893e-01  2.206e-01  8.250e-01  1.800e-01  2.430e-01 
 OH83P102  0.7342908     7.2  24009.56   0.05  532  1   4.483e+01   2.241e+01   2.241e+01  33   24  2.942e-01  2.942e-01  2.942e-01  3.219e-01  3.219e-01  3.219e-01  4.732e-01  2.731e-01  9.840e-01  2.250e-01  2.980e-01 
 OH83P103  0.7371397    11.7  24093.46   0.11  532  1   3.527e+01   1.764e+01   1.764e+01  33   32  3.199e-01  3.198e-01  3.199e-01  3.542e-01  3.542e-01  3.542e-01  5.069e-01  2.977e-01  1.034e+00  2.470e-01  3.210e-01 
 OH83P104  0.7403900    17.0  24201.66   0.20  532  1   2.205e+01   1.102e+01   1.102e+01  33   40  3.367e-01  3.366e-01  3.367e-01  3.772e-01  3.791e-01  3.754e-01  5.260e-01  3.141e-01  1.053e+00  2.630e-01  3.350e-01 
 OH83P105  0.7440524    22.9  24334.24   0.31  532  2   1.157e+01   5.978e+00   5.596e+00  33   48  3.499e-01  3.499e-01  3.499e-01  3.968e-01  4.056e-01  3.879e-01  5.393e-01  3.272e-01  1.060e+00  2.760e-01  3.460e-01 
 OH83P106  0.7481374    29.4  24491.19   0.46  532  2   5.867e+00   3.044e+00   2.823e+00  33   56  3.613e-01  3.613e-01  3.613e-01  4.146e-01  4.310e-01  3.981e-01  5.497e-01  3.385e-01  1.060e+00  2.880e-01  3.550e-01 
 OH83P107  0.7526555    36.6  24672.42   0.62  438  2   7.507e+00   5.944e+00   1.563e+00  22   64  3.716e-01  3.716e-01  3.715e-01  4.315e-01  4.559e-01  4.068e-01  5.583e-01  3.487e-01  1.057e+00  2.990e-01  3.630e-01 
 OH83P108  0.7576188    44.4  24877.77   0.81  301  2   2.298e+00   1.211e+00   1.087e+00  33   72  3.810e-01  3.811e-01  3.810e-01  4.478e-01  4.808e-01  4.144e-01  5.659e-01  3.580e-01  1.052e+00  3.090e-01  3.700e-01 
 OH83P109  0.7630410    53.0  25106.98   1.02  301  2   5.329e+00   9.862e-01   4.343e+00  10   80  3.899e-01  3.900e-01  3.899e-01  4.637e-01  5.058e-01  4.210e-01  5.725e-01  3.667e-01  1.045e+00  3.190e-01  3.670e-01 
 OH83P111  0.7753269    72.5  25635.71   1.49  532  2   1.240e+00   6.757e-01   5.640e-01  22   96  4.062e-01  4.063e-01  4.061e-01  4.948e-01  5.562e-01  4.319e-01  5.836e-01  3.820e-01  1.028e+00  3.380e-01  3.770e-01 
 OH83P112  0.7822287    83.5  25934.43   1.75  532  2   1.212e+00   6.852e-01   5.272e-01  31  104  4.138e-01  4.139e-01  4.137e-01  5.100e-01  5.818e-01  4.363e-01  5.884e-01  3.888e-01  1.018e+00  3.460e-01  3.800e-01 
 OH83P113  0.7896664    95.6  26255.43   2.01  532  2   9.527e-01   4.018e-01   5.509e-01  11  112  4.211e-01  4.212e-01  4.209e-01  5.252e-01  6.077e-01  4.402e-01  5.929e-01  3.949e-01  1.009e+00  3.540e-01  3.820e-01 
 OH83P114  0.7976658   108.7  26598.20   2.29  532  2   3.587e-01   1.874e-01   1.713e-01  32  120  4.281e-01  4.282e-01  4.279e-01  5.403e-01  6.338e-01  4.435e-01  5.971e-01  4.004e-01  9.970e-01  3.620e-01  3.840e-01 
 OH83P115  0.8062565   123.0  26962.14   2.57  532  2   2.565e-01   1.572e-01   9.930e-02  03  128  4.348e-01  4.349e-01  4.346e-01  5.553e-01  6.603e-01  4.462e-01  6.011e-01  4.052e-01  1.000e+16  3.690e-01  3.840e-01 
 OH83P116  0.8154716   138.5  27346.63   2.86  532  2   8.085e-02   4.726e-02   3.359e-02  10  136  4.412e-01  4.414e-01  4.410e-01  5.703e-01  6.870e-01  4.484e-01  6.050e-01  4.094e-01  1.000e+16  1.000e+16  1.000e+16 
 OH83P201  0.7305731     3.7  24080.40   0.04  532  1   1.099e+01   5.494e+00   5.494e+00  33    8  3.759e-01  3.759e-01  3.760e-01  4.065e-01  4.065e-01  4.065e-01  6.210e-01  3.471e-01  1.338e+00  2.930e-01  3.870e-01 
 OH83P202  0.7331168     2.6  24122.04   0.08  532  1   1.554e+01   7.771e+00   7.771e+00  33   16  3.538e-01  3.538e-01  3.539e-01  3.871e-01  3.871e-01  3.871e-01  5.739e-01  3.278e-01  1.209e+00  2.770e-01  3.600e-01 
 OH83P203  0.7360687     0.3  24191.15   0.09  532  1   1.442e+01   7.212e+00   7.212e+00  33   24  3.516e-01  3.515e-01  3.516e-01  3.893e-01  3.893e-01  3.893e-01  5.608e-01  3.267e-01  1.156e+00  2.770e-01  3.540e-01 
 OH83P204  0.7394234    -2.9  24287.32   0.07  532  1   1.011e+01   5.056e+00   5.056e+00  33   32  3.556e-01  3.555e-01  3.557e-01  3.985e-01  3.985e-01  3.985e-01  5.583e-01  3.314e-01  1.127e+00  2.820e-01  3.550e-01 
 OH83P205  0.7431826    -6.8  24410.12   0.03  532  1   6.040e+00   3.020e+00   3.020e+00  33   40  3.622e-01  3.621e-01  3.622e-01  4.107e-01  4.107e-01  4.107e-01  5.603e-01  3.384e-01  1.108e+00  2.890e-01  3.590e-01 
 OH83P206  0.7473527   -11.3  24559.08  -0.05  532  1   3.339e+00   1.669e+00   1.669e+00  33   48  3.698e-01  3.697e-01  3.698e-01  4.243e-01  4.075e-01  4.411e-01  5.641e-01  3.462e-01  1.093e+00  2.980e-01  3.640e-01 
 OH83P207  0.7519442   -16.4  24733.74  -0.15  519  1   2.126e+00   1.063e+00   1.063e+00  33   56  3.777e-01  3.776e-01  3.778e-01  4.386e-01  4.136e-01  4.636e-01  5.689e-01  3.543e-01  1.080e+00  3.060e-01  3.690e-01 
 OH83P208  0.7569700   -22.0  24933.62  -0.27  301  2   1.502e+00   7.043e-01   7.977e-01  33   64  3.857e-01  3.856e-01  3.857e-01  4.533e-01  4.195e-01  4.868e-01  5.737e-01  3.623e-01  1.068e+00  3.150e-01  3.750e-01 
 OH83P209  0.7624451   -28.3  25158.26  -0.42  301  2   1.269e+00   5.724e-01   6.970e-01  11   72  3.935e-01  3.935e-01  3.936e-01  4.680e-01  4.251e-01  5.107e-01  5.785e-01  3.701e-01  1.057e+00  3.240e-01  3.800e-01 
 OH83P210  0.7683867   -35.2  25407.16  -0.59  532  2   1.061e+00   4.767e-01   5.839e-01  33   80  4.012e-01  4.011e-01  4.012e-01  4.828e-01  4.301e-01  5.351e-01  5.831e-01  3.774e-01  1.045e+00  3.320e-01  3.760e-01 
 OH83P211  0.7748137   -42.9  25679.82  -0.77  532  2   9.288e-01   4.196e-01   5.093e-01  33   88  4.086e-01  4.085e-01  4.087e-01  4.977e-01  4.347e-01  5.599e-01  5.876e-01  3.843e-01  1.033e+00  3.410e-01  3.790e-01 
 OH83P212  0.7817478   -51.2  25975.70  -0.97  532  2   8.284e-01   4.043e-01   4.241e-01  22   96  4.158e-01  4.157e-01  4.159e-01  5.125e-01  4.388e-01  5.851e-01  5.919e-01  3.907e-01  1.022e+00  3.490e-01  3.820e-01 
 OH83P213  0.7892127   -60.4  26294.25  -1.19  532  2   5.138e-01   2.894e-01   2.244e-01  01  104  4.228e-01  4.227e-01  4.228e-01  5.273e-01  4.424e-01  6.107e-01  5.958e-01  3.965e-01  1.009e+00  3.570e-01  3.840e-01 
 OH83P214  0.7972353   -70.5  26634.88  -1.42  532  2   2.791e-01   1.346e-01   1.445e-01  22  112  4.295e-01  4.294e-01  4.296e-01  5.421e-01  4.455e-01  6.367e-01  5.996e-01  4.018e-01  9.970e-01  3.640e-01  3.850e-01 
 OH83P215  0.8058455   -81.5  26996.95  -1.65  532  2   1.622e-01   5.971e-02   1.025e-01  30  120  4.360e-01  4.359e-01  4.361e-01  5.569e-01  4.481e-01  6.631e-01  6.033e-01  4.065e-01  9.850e-01  3.710e-01  3.860e-01 
 OH83P216  0.8150770   -93.6  27379.79  -1.90  532  2   6.188e-01   3.891e-02   5.799e-01  01  128  4.423e-01  4.421e-01  4.424e-01  5.717e-01  4.502e-01  6.897e-01  6.070e-01  4.106e-01  1.000e+16  3.770e-01  3.850e-01 
 OH83P217  0.8249676  -106.8  27782.71  -2.15  532  2   3.271e-02   1.422e-02   1.848e-02  02  136  4.482e-01  4.480e-01  4.484e-01  5.863e-01  4.517e-01  7.166e-01  6.107e-01  4.140e-01  1.000e+16  1.000e+16  1.000e+16 
 OH83Q101  0.7278410    -1.8  23949.83   0.01  532  1   4.439e+01   2.220e+01   2.220e+01  33   16  3.126e-01  3.127e-01  3.126e-01  3.208e-01  3.208e-01  3.208e-01  5.329e-01  2.871e-01  1.188e+00  2.360e-01  3.290e-01 
 OH83Q102  0.7286447    -6.6  24009.56   0.05  532  1   1.673e+01   8.366e+00   8.366e+00  33   24  1.284e-01  1.285e-01  1.284e-01  1.141e-01  1.141e-01  1.141e-01  2.190e-01  1.178e-01  4.880e-01  9.700e-02  1.350e-01 
 OH83Q103  0.7297951   -15.2  24093.46   0.11  532  1   5.640e+00   2.820e+00   2.820e+00  33   32  6.802e-02  6.804e-02  6.799e-02  5.228e-02  5.207e-02  5.249e-02  1.160e-01  6.235e-02  2.590e-01  5.200e-02  7.200e-02 
 OH83Q104  0.7313070   -27.6  24201.66   0.20  532  2   1.660e+00   7.860e-01   8.744e-01  33   40  4.124e-02  4.126e-02  4.121e-02  2.743e-02  2.643e-02  2.844e-02  7.036e-02  3.778e-02  1.570e-01  3.200e-02  4.400e-02 
 OH83Q105  0.7331929   -43.9  24334.24   0.31  532  2   3.942e-01   1.991e-01   1.951e-01  31   48  2.727e-02  2.729e-02  2.725e-02  1.570e-02  1.462e-02  1.679e-02  4.654e-02  2.498e-02  1.030e-01  2.100e-02  2.900e-02 
 OH83Q106  0.7354636   -63.9  24491.19   0.46  532  2   1.880e-01   4.541e-02   1.426e-01  10   56  1.919e-02  1.920e-02  1.917e-02  9.561e-03  8.592e-03  1.054e-02  3.273e-02  1.758e-02  7.300e-02  1.500e-02  2.100e-02 
 OH83Q201  0.7277114    -5.9  24080.40   0.04  532  1   5.286e+00   2.643e+00   2.643e+00  33    8  1.791e-01  1.791e-01  1.791e-01  1.837e-01  1.837e-01  1.837e-01  3.048e-01  1.646e-01  6.790e-01  1.350e-01  1.880e-01 
 OH83Q202  0.7283570   -10.1  24122.04   0.08  532  1   1.373e+00   6.864e-01   6.864e-01  33   16  3.891e-02  3.891e-02  3.891e-02  3.456e-02  3.456e-02  3.456e-02  6.617e-02  3.587e-02  1.470e-01  2.900e-02  4.100e-02 
 OH83Q203  0.7294215   -11.2  24191.15   0.09  532  1   4.680e-01   2.340e-01   2.340e-01  30   24  1.867e-02  1.867e-02  1.866e-02  1.435e-02  1.435e-02  1.435e-02  3.170e-02  1.726e-02  7.000e-02  1.400e-02  2.000e-02 
 OH83Q205  0.7327698    -2.3  24410.12   0.03  532  1   4.732e-02   2.366e-02   2.366e-02  30   40  8.375e-03  8.382e-03  8.368e-03  4.822e-03  4.822e-03  4.822e-03  1.416e-02  7.770e-03  3.100e-02  6.000e-03  9.000e-03 
 OH83R103  0.7242176    -1.4  24093.46   0.11  532  1   1.717e+01   8.586e+00   8.586e+00  33   32  1.626e-01  1.626e-01  1.626e-01  1.662e-01  1.662e-01  1.662e-01  2.971e-01  1.478e-01  7.150e-01  1.210e-01  1.800e-01 
 OH83R104  0.7240775    -0.8  24201.66   0.20  532  1   1.038e+01   5.191e+00   5.191e+00  33   40  1.713e-01  1.713e-01  1.713e-01  1.730e-01  1.730e-01  1.730e-01  3.206e-01  1.551e-01  7.900e-01  1.260e-01  1.940e-01 
 OH83R105  0.7242846     0.5  24334.24   0.31  532  1   5.112e+00   2.556e+00   2.556e+00  33   48  1.701e-01  1.701e-01  1.701e-01  1.697e-01  1.697e-01  1.697e-01  3.267e-01  1.532e-01  8.240e-01  1.230e-01  1.970e-01 
 OH83R107  0.7257894     5.4  24672.42   0.62  532  1   1.221e+00   6.105e-01   6.105e-01  33   64  1.558e-01  1.559e-01  1.558e-01  1.518e-01  1.518e-01  1.518e-01  3.174e-01  1.388e-01  8.400e-01  1.100e-01  1.900e-01 
 OH83R108  0.7271083     8.9  24877.77   0.81  532  1   7.590e-01   3.795e-01   3.795e-01  30   72  1.461e-01  1.462e-01  1.461e-01  1.407e-01  1.407e-01  1.407e-01  3.076e-01  1.293e-01  8.350e-01  1.020e-01  1.840e-01 
 OH83R111  0.7334506    23.7  25635.71   1.49  532  2   3.193e-01   1.582e-01   1.612e-01  33   96  1.143e-01  1.143e-01  1.143e-01  1.062e-01  1.062e-01  1.062e-01  2.701e-01  9.822e-02  7.900e-01  7.700e-02  1.540e-01 
 OH83R112  0.7363969    30.1  25934.43   1.75  532  2   2.081e-01   9.782e-02   1.103e-01  33  104  1.037e-01  1.037e-01  1.036e-01  9.517e-02  9.517e-02  9.517e-02  2.563e-01  8.783e-02  7.690e-01  6.900e-02  1.440e-01 
 OH83R113  0.7397811    37.4  26255.43   2.01  532  2   1.526e-01   8.212e-02   7.049e-02  33  112  9.330e-02  9.332e-02  9.327e-02  8.465e-02  8.538e-02  8.389e-02  2.424e-01  7.769e-02  7.450e-01  6.100e-02  1.350e-01 
 OH83R114  0.7436188    45.5  26598.20   2.29  532  2   6.989e-02   2.942e-02   4.047e-02  31  120  8.330e-02  8.333e-02  8.327e-02  7.468e-02  7.659e-02  7.270e-02  2.283e-01  6.788e-02  7.190e-01  5.300e-02  1.250e-01 
 OH83R202  0.7255127    -0.4  24122.04   0.08  532  1   6.867e+00   3.434e+00   3.434e+00  33   16  1.618e-01  1.617e-01  1.618e-01  1.673e-01  1.673e-01  1.673e-01  2.848e-01  1.478e-01  6.580e-01  1.170e-01  1.740e-01 
 OH83R204  0.7243401     2.8  24287.32   0.07  533  1   4.816e+00   2.408e+00   2.408e+00  33   32  1.845e-01  1.844e-01  1.845e-01  1.863e-01  1.863e-01  1.863e-01  3.414e-01  1.671e-01  8.320e-01  1.310e-01  2.070e-01 
 OH83R205  0.7243929     3.5  24410.12   0.03  532  1   2.687e+00   1.343e+00   1.343e+00  33   40  1.789e-01  1.789e-01  1.789e-01  1.786e-01  1.786e-01  1.786e-01  3.403e-01  1.613e-01  8.510e-01  1.270e-01  2.060e-01 
 OH83R207  0.7257283     2.7  24733.74  -0.15  532  1   8.573e-01   4.287e-01   4.287e-01  33   56  1.603e-01  1.603e-01  1.604e-01  1.562e-01  1.562e-01  1.562e-01  3.241e-01  1.430e-01  8.550e-01  1.120e-01  1.950e-01 
 OH83R208  0.7270030     1.2  24933.62  -0.27  532  1   5.529e-01   2.765e-01   2.765e-01  33   64  1.495e-01  1.495e-01  1.495e-01  1.440e-01  1.440e-01  1.440e-01  3.126e-01  1.324e-01  8.480e-01  1.030e-01  1.870e-01 
 OH83R209  0.7286837    -0.9  25158.26  -0.42  532  1   4.939e-01   2.469e-01   2.469e-01  33   72  1.383e-01  1.383e-01  1.384e-01  1.316e-01  1.316e-01  1.316e-01  2.999e-01  1.216e-01  8.350e-01  9.400e-02  1.790e-01 
 OH83R210  0.7307752    -3.8  25407.16  -0.59  532  1   2.627e-01   1.314e-01   1.314e-01  33   80  1.271e-01  1.270e-01  1.271e-01  1.195e-01  1.195e-01  1.195e-01  2.864e-01  1.106e-01  8.200e-01  8.600e-02  1.640e-01 
 OH83R214  0.7434377   -21.9  26634.88  -1.42  532  2   5.267e-02   2.467e-02   2.800e-02  30  112  8.418e-02  8.416e-02  8.420e-02  7.547e-02  7.348e-02  7.742e-02  2.298e-01  6.874e-02  7.310e-01  5.400e-02  1.260e-01 
 OH83R215  0.7477447   -28.3  26996.95  -1.65  532  2   3.339e-02   1.818e-02   1.521e-02  03  120  7.447e-02  7.445e-02  7.449e-02  6.597e-02  6.308e-02  6.879e-02  2.156e-01  5.921e-02  7.040e-01  4.600e-02  1.160e-01 
 OH84P101  0.9442241     5.4  23949.83   0.01  531  1   3.165e+02   1.582e+02   1.582e+02  33   16  1.947e+00  1.947e+00  1.947e+00  2.067e+00  2.067e+00  2.067e+00  2.944e+00  1.740e+00  5.247e+00  1.676e+00  2.341e+00 
 OH84P102  0.9479456    10.7  24009.56   0.05  303  1   3.653e+02   1.826e+02   1.826e+02  33   24  2.384e+00  2.384e+00  2.384e+00  2.525e+00  2.525e+00  2.525e+00  3.570e+00  2.134e+00  6.274e+00  2.063e+00  2.834e+00 
 OH84P103  0.9521968    17.3  24093.46   0.11  300  1   2.848e+02   1.424e+02   1.424e+02  33   32  2.571e+00  2.571e+00  2.571e+00  2.717e+00  2.717e+00  2.717e+00  3.814e+00  2.305e+00  6.611e+00  2.235e+00  3.025e+00 
 OH84P104  0.9569966    25.0  24201.66   0.20  300  2   1.783e+02   8.920e+01   8.913e+01  33   40  2.685e+00  2.685e+00  2.685e+00  2.830e+00  2.844e+00  2.816e+00  3.948e+00  2.410e+00  6.747e+00  2.344e+00  3.128e+00 
 OH84P105  0.9623608    33.6  24334.24   0.31  300  2   8.140e+01   4.325e+01   3.814e+01  33   48  2.768e+00  2.768e+00  2.768e+00  2.911e+00  2.976e+00  2.846e+00  4.035e+00  2.489e+00  6.802e+00  2.426e+00  3.198e+00 
 OH84P106  0.9683042    43.0  24491.19   0.46  300  2   4.576e+01   2.356e+01   2.220e+01  33   56  2.836e+00  2.836e+00  2.836e+00  2.975e+00  3.093e+00  2.857e+00  4.101e+00  2.553e+00  6.816e+00  2.494e+00  3.251e+00 
 OH84P107  0.9748429    53.3  24672.42   0.62  300  2   2.567e+01   1.309e+01   1.257e+01  33   64  2.894e+00  2.894e+00  2.894e+00  3.028e+00  3.200e+00  2.855e+00  4.152e+00  2.609e+00  6.806e+00  2.554e+00  3.296e+00 
 OH84P108  0.9819946    64.5  24877.77   0.81  300  2   1.653e+01   8.899e+00   7.629e+00  31   72  2.944e+00  2.945e+00  2.944e+00  3.074e+00  3.301e+00  2.844e+00  4.193e+00  2.657e+00  6.779e+00  2.607e+00  3.335e+00 
 OH84P109  0.9897800    76.8  25106.98   1.02  300  2   1.030e+01   4.391e+00   5.910e+00  22   80  2.989e+00  2.989e+00  2.988e+00  3.113e+00  3.395e+00  2.826e+00  4.227e+00  2.700e+00  6.738e+00  2.654e+00  3.380e+00 
 OH84P111  1.0073495   104.7  25635.71   1.49  300  2   8.233e+00   4.737e+00   3.496e+00  13   96  3.061e+00  3.062e+00  3.060e+00  3.173e+00  3.567e+00  2.769e+00  4.273e+00  2.772e+00  6.626e+00  2.736e+00  3.448e+00 
 OH84P112  1.0171915   120.5  25934.43   1.75  299  2   6.534e+00   1.958e+00   4.576e+00  02  104  3.090e+00  3.091e+00  3.089e+00  3.195e+00  3.645e+00  2.733e+00  4.287e+00  2.802e+00  6.557e+00  2.771e+00  3.480e+00 
 OH84P201  0.9422317     5.7  24080.40   0.04  530  1   9.803e+01   4.902e+01   4.902e+01  33    8  3.091e+00  3.090e+00  3.091e+00  3.282e+00  3.282e+00  3.282e+00  4.706e+00  2.757e+00  8.491e+00  2.738e+00  3.752e+00 
 OH84P202  0.9461125     3.9  24122.04   0.08  530  1   1.372e+02   6.862e+01   6.862e+01  33   16  2.882e+00  2.881e+00  2.882e+00  3.052e+00  3.052e+00  3.052e+00  4.339e+00  2.575e+00  7.707e+00  2.550e+00  3.450e+00 
 OH84P203  0.9505423     0.4  24191.15   0.09  300  1   1.180e+02   5.898e+01   5.898e+01  33   24  2.837e+00  2.837e+00  2.838e+00  2.998e+00  2.998e+00  2.998e+00  4.226e+00  2.541e+00  7.393e+00  2.510e+00  3.355e+00 
 OH84P204  0.9555154    -4.3  24287.32   0.07  300  1   8.272e+01   4.136e+01   4.136e+01  33   32  2.845e+00  2.844e+00  2.845e+00  2.998e+00  2.998e+00  2.998e+00  4.195e+00  2.552e+00  7.227e+00  2.518e+00  3.327e+00 
 OH84P207  0.9737693   -24.0  24733.74  -0.15  300  2   1.691e+01   8.154e+00   8.758e+00  33   56  2.947e+00  2.946e+00  2.947e+00  3.084e+00  2.908e+00  3.259e+00  4.233e+00  2.655e+00  6.970e+00  2.619e+00  3.362e+00 
 OH84P208  0.9810185   -32.2  24933.62  -0.27  300  2   1.289e+01   7.089e+00   5.799e+00  33   64  2.984e+00  2.984e+00  2.985e+00  3.115e+00  2.884e+00  3.346e+00  4.255e+00  2.693e+00  6.902e+00  2.658e+00  3.385e+00 
 OH84P209  0.9888859   -41.2  25158.26  -0.42  300  2   9.178e+00   4.318e+00   4.860e+00  33   72  3.020e+00  3.019e+00  3.020e+00  3.145e+00  2.856e+00  3.432e+00  4.274e+00  2.728e+00  6.832e+00  2.696e+00  3.410e+00 
 OH84P210  0.9973975   -51.2  25407.16  -0.59  300  2   6.356e+00   2.488e+00   3.869e+00  22   80  3.052e+00  3.052e+00  3.053e+00  3.171e+00  2.825e+00  3.514e+00  4.292e+00  2.761e+00  6.759e+00  2.731e+00  3.446e+00 
 OH84P211  1.0065825   -62.1  25679.82  -0.77  299  2   6.492e+00   3.284e+00   3.208e+00  22   88  3.082e+00  3.081e+00  3.082e+00  3.194e+00  2.790e+00  3.593e+00  4.305e+00  2.791e+00  6.682e+00  2.765e+00  3.474e+00 
 OH84P212  1.0164734   -74.0  25975.70  -0.97  299  2   6.635e+00   3.279e+00   3.356e+00  30   96  3.107e+00  3.107e+00  3.108e+00  3.213e+00  2.751e+00  3.668e+00  4.315e+00  2.818e+00  6.599e+00  2.795e+00  3.502e+00 
 OH84Q101  0.9378534    -2.8  23949.83   0.01  531  1   4.090e+02   2.045e+02   2.045e+02  33   16  2.612e+00  2.612e+00  2.612e+00  2.680e+00  2.680e+00  2.680e+00  4.054e+00  2.321e+00  7.482e+00  2.270e+00  3.252e+00 
 OH84Q102  0.9389285   -10.4  24009.56   0.05  530  1   1.611e+02   8.055e+01   8.055e+01  30   24  1.075e+00  1.075e+00  1.075e+00  1.033e+00  1.033e+00  1.033e+00  1.668e+00  9.539e-01  3.079e+00  9.360e-01  1.341e+00 
 OH84Q103  0.9404663   -24.0  24093.46   0.11  531  2   5.519e+01   2.734e+01   2.785e+01  33   32  5.696e-01  5.698e-01  5.694e-01  5.130e-01  5.109e-01  5.150e-01  8.842e-01  5.051e-01  1.631e+00  4.980e-01  7.130e-01 
 OH84Q104  0.9424867   -43.7  24201.66   0.20  529  2   1.473e+01   9.394e+00   5.336e+00  11   40  3.454e-01  3.456e-01  3.453e-01  2.914e-01  2.808e-01  3.021e-01  5.360e-01  3.062e-01  9.870e-01  3.030e-01  4.340e-01 
 OH84Q105  0.9450066   -69.6  24334.24   0.31  528  2   1.042e+01   7.567e+00   2.851e+00  22   48  2.283e-01  2.284e-01  2.282e-01  1.805e-01  1.680e-01  1.930e-01  3.544e-01  2.023e-01  6.510e-01  2.010e-01  2.880e-01 
 OH84Q107  0.9516045  -139.1  24672.42   0.62  300  2   5.290e-01   5.350e-01  -6.017e-03  01   64  1.180e-01  1.181e-01  1.179e-01  8.186e-02  7.095e-02  9.288e-02  1.829e-01  1.047e-01  3.330e-01  1.050e-01  1.510e-01 
 OH84Q201  0.9376894    -9.5  24080.40   0.04  531  1   4.482e+01   2.241e+01   2.241e+01  33    8  1.494e+00  1.494e+00  1.494e+00  1.533e+00  1.533e+00  1.533e+00  2.316e+00  1.329e+00  4.274e+00  1.297e+00  1.858e+00 
 OH84Q202  0.9385488   -16.3  24122.04   0.08  530  1   1.399e+01   6.997e+00   6.997e+00  33   16  3.236e-01  3.236e-01  3.236e-01  3.111e-01  3.111e-01  3.111e-01  5.014e-01  2.887e-01  9.240e-01  2.810e-01  4.030e-01 
 OH84Q203  0.9399670   -18.2  24191.15   0.09  530  1   5.209e+00   2.605e+00   2.605e+00  33   24  1.547e-01  1.547e-01  1.547e-01  1.393e-01  1.393e-01  1.393e-01  2.394e-01  1.384e-01  4.400e-01  1.340e-01  1.930e-01 
 OH84Q204  0.9419313   -14.3  24287.32   0.07  528  1   2.181e+00   1.091e+00   1.091e+00  33   32  9.668e-02  9.672e-02  9.665e-02  8.158e-02  8.158e-02  8.158e-02  1.493e-01  8.670e-02  2.740e-01  8.400e-02  1.210e-01 
 OH84R103  0.9315903    -2.9  24093.46   0.11  531  1   1.586e+02   7.931e+01   7.931e+01  33   32  1.408e+00  1.408e+00  1.408e+00  1.508e+00  1.508e+00  1.508e+00  2.279e+00  1.243e+00  4.429e+00  1.230e+00  1.859e+00 
 OH84R104  0.9309928    -2.6  24201.66   0.20  530  1   1.000e+02   5.001e+01   5.001e+01  33   40  1.503e+00  1.503e+00  1.503e+00  1.613e+00  1.613e+00  1.613e+00  2.467e+00  1.323e+00  4.869e+00  1.308e+00  2.027e+00 
 OH84R105  0.9308552    -1.3  24334.24   0.31  529  1   5.110e+01   2.555e+01   2.555e+01  33   48  1.513e+00  1.513e+00  1.513e+00  1.628e+00  1.628e+00  1.628e+00  2.522e+00  1.328e+00  5.053e+00  1.312e+00  2.090e+00 
 OH84R108  0.9333658     8.8  24877.77   0.81  530  1   8.135e+00   4.067e+00   4.067e+00  33   72  1.364e+00  1.364e+00  1.363e+00  1.478e+00  1.478e+00  1.478e+00  2.393e+00  1.185e+00  5.020e+00  1.175e+00  2.054e+00 
 OH84R109  0.9352244    14.2  25106.98   1.02  530  1   5.605e+00   2.803e+00   2.803e+00  33   80  1.290e+00  1.290e+00  1.289e+00  1.401e+00  1.401e+00  1.401e+00  2.309e+00  1.117e+00  4.917e+00  1.109e+00  2.022e+00 
 OH84R111  0.9405582    27.8  25635.71   1.49  529  2   2.887e+00   1.283e+00   1.604e+00  22   96  1.129e+00  1.129e+00  1.129e+00  1.232e+00  1.232e+00  1.232e+00  2.112e+00  9.704e-01  4.635e+00  9.700e-01  1.925e+00 
 OH84R112  0.9440655    36.2  25934.43   1.75  528  2   5.669e+00   4.431e+00   1.237e+00  22  104  1.046e+00  1.046e+00  1.045e+00  1.144e+00  1.144e+00  1.144e+00  2.004e+00  8.957e-01  4.465e+00  8.980e-01  1.873e+00 
 OH84R113  0.9481578    45.8  26255.43   2.01  301  2   1.813e+00   9.305e-01   8.822e-01  20  112  9.622e-01  9.625e-01  9.619e-01  1.056e+00  1.065e+00  1.046e+00  1.894e+00  8.213e-01  4.281e+00  8.270e-01  1.820e+00 
 OH84R114  0.9528567    56.5  26598.20   2.29  299  2   6.983e-01   4.064e-01   2.919e-01  30  120  8.796e-01  8.799e-01  8.793e-01  9.674e-01  9.921e-01  9.417e-01  1.780e+00  7.480e-01  4.084e+00  7.580e-01  1.768e+00 
 OH84R202  0.9340419    -1.1  24122.04   0.08  530  1   6.327e+01   3.163e+01   3.163e+01  33   16  1.374e+00  1.374e+00  1.374e+00  1.468e+00  1.468e+00  1.468e+00  2.174e+00  1.217e+00  4.112e+00  1.165e+00  1.757e+00 
 OH84R206  0.9313313     6.1  24559.08  -0.05  529  1   1.411e+01   7.057e+00   7.057e+00  33   48  1.532e+00  1.532e+00  1.533e+00  1.653e+00  1.653e+00  1.653e+00  2.582e+00  1.341e+00  5.238e+00  1.303e+00  2.157e+00 
 OH84R210  0.9374687    -1.8  25407.16  -0.59  530  1   2.960e+00   1.480e+00   1.480e+00  33   80  1.227e+00  1.227e+00  1.227e+00  1.337e+00  1.337e+00  1.337e+00  2.237e+00  1.060e+00  4.859e+00  1.044e+00  1.993e+00 
 OH84R211  0.9403844    -6.1  25679.82  -0.77  529  1   2.311e+00   1.155e+00   1.155e+00  30   88  1.142e+00  1.142e+00  1.142e+00  1.247e+00  1.247e+00  1.247e+00  2.131e+00  9.826e-01  4.706e+00  9.720e-01  1.939e+00 
 OH84R212  0.9438737   -11.4  25975.70  -0.97  528  1   1.995e+00   9.975e-01   9.975e-01  33   96  1.057e+00  1.056e+00  1.057e+00  1.156e+00  1.156e+00  1.156e+00  2.020e+00  9.056e-01  4.536e+00  9.000e-01  1.884e+00 
 OH93P101  0.6289171     2.7  26185.80   0.01  231  1   5.643e+00   2.821e+00   2.821e+00  33   16  6.189e-02  6.188e-02  6.190e-02  5.840e-02  5.840e-02  5.840e-02  1.068e-01  5.861e-02  2.540e-01  1.000e+16  1.000e+16 
 OH93P102  0.6308669     5.6  26242.19   0.04  231  1   6.973e+00   3.487e+00   3.487e+00  33   24  7.693e-02  7.692e-02  7.694e-02  7.398e-02  7.398e-02  7.398e-02  1.302e-01  7.314e-02  3.020e-01  1.000e+16  1.000e+16 
 OH93P103  0.6331592     9.3  26321.33   0.09  231  1   5.772e+00   2.886e+00   2.886e+00  33   32  8.420e-02  8.419e-02  8.421e-02  8.250e-02  8.250e-02  8.250e-02  1.398e-01  8.039e-02  3.170e-01  1.000e+16  1.000e+16 
 OH93P104  0.6358065    13.6  26423.32   0.17  231  1   3.817e+00   1.908e+00   1.908e+00  33   40  8.916e-02  8.915e-02  8.917e-02  8.903e-02  8.947e-02  8.859e-02  1.454e-01  8.552e-02  3.230e-01  1.000e+16  1.000e+16 
 OH93P105  0.6388194    18.7  26548.20   0.27  231  2   2.053e+00   1.061e+00   9.925e-01  33   48  9.319e-02  9.318e-02  9.320e-02  9.483e-02  9.694e-02  9.271e-02  1.494e-01  8.982e-02  3.250e-01  1.000e+16  1.000e+16 
 OH93P106  0.6422080    24.2  26695.94   0.39  231  2   1.012e+00   5.129e-01   4.988e-01  33   56  9.673e-02  9.672e-02  9.673e-02  1.003e-01  1.043e-01  9.631e-02  1.526e-01  9.370e-02  3.250e-01  1.000e+16  1.000e+16 
 OH93P107  0.6459829    30.4  26866.42   0.54  231  2   5.285e-01   2.592e-01   2.692e-01  33   64  9.995e-02  9.995e-02  9.994e-02  1.056e-01  1.116e-01  9.957e-02  1.553e-01  9.734e-02  3.240e-01  1.000e+16  1.000e+16 
 OH93P108  0.6501558    37.3  27059.45   0.70  231  2   2.837e-01   1.492e-01   1.345e-01  33   72  1.029e-01  1.029e-01  1.029e-01  1.108e-01  1.190e-01  1.026e-01  1.576e-01  1.008e-01  3.220e-01  1.000e+16  1.000e+16 
 OH93P109  0.6547400    44.8  27274.76   0.89  231  2   1.927e-01   1.143e-01   7.839e-02  13   80  1.058e-01  1.058e-01  1.057e-01  1.160e-01  1.266e-01  1.054e-01  1.596e-01  1.041e-01  3.200e-01  1.000e+16  1.000e+16 
 OH93P110  0.6597508    53.0  27512.03   1.09  231  2   9.911e-02   5.185e-02   4.726e-02  20   88  1.084e-01  1.085e-01  1.084e-01  1.213e-01  1.343e-01  1.080e-01  1.614e-01  1.073e-01  3.180e-01  1.000e+16  1.000e+16 
 OH93P111  0.6652054    62.0  27770.87   1.30  231  2   9.947e-02   1.430e-02   8.518e-02  10   96  1.111e-01  1.111e-01  1.110e-01  1.265e-01  1.423e-01  1.105e-01  1.632e-01  1.104e-01  3.150e-01  1.000e+16  1.000e+16 
 OH93P201  0.6279826     3.0  26316.52   0.04  231  1   1.323e+00   6.613e-01   6.613e-01  33    8  9.722e-02  9.721e-02  9.723e-02  9.174e-02  9.174e-02  9.174e-02  1.704e-01  9.180e-02  4.120e-01  1.000e+16  1.000e+16 
 OH93P202  0.6299644     2.4  26355.56   0.06  231  1   2.352e+00   1.176e+00   1.176e+00  33   16  9.225e-02  9.223e-02  9.226e-02  8.871e-02  8.871e-02  8.871e-02  1.579e-01  8.750e-02  3.720e-01  1.000e+16  1.000e+16 
 OH93P203  0.6323146     0.8  26420.37   0.07  231  1   2.228e+00   1.114e+00   1.114e+00  33   24  9.232e-02  9.231e-02  9.234e-02  9.047e-02  9.047e-02  9.047e-02  1.546e-01  8.799e-02  3.550e-01  1.000e+16  1.000e+16 
 OH93P204  0.6350288    -1.6  26510.59   0.06  231  1   1.661e+00   8.305e-01   8.305e-01  33   32  9.400e-02  9.398e-02  9.402e-02  9.387e-02  9.387e-02  9.387e-02  1.543e-01  9.003e-02  3.450e-01  1.000e+16  1.000e+16 
 OH93P205  0.6381079    -4.7  26625.81   0.02  231  1   1.013e+00   5.066e-01   5.066e-01  33   40  9.631e-02  9.629e-02  9.633e-02  9.801e-02  9.801e-02  9.801e-02  1.551e-01  9.272e-02  3.390e-01  1.000e+16  1.000e+16 
 OH93P206  0.6415575    -8.3  26765.59  -0.05  231  1   5.248e-01   2.624e-01   2.624e-01  33   48  9.887e-02  9.885e-02  9.889e-02  1.025e-01  9.845e-02  1.066e-01  1.565e-01  9.569e-02  3.340e-01  1.000e+16  1.000e+16 
 OH93P208  0.6496066   -17.2  27116.99  -0.25  231  2   1.740e-01   8.070e-02   9.330e-02  33   64  1.041e-01  1.041e-01  1.041e-01  1.121e-01  1.038e-01  1.204e-01  1.597e-01  1.019e-01  3.270e-01  1.000e+16  1.000e+16 
 OH93P210  0.6592768   -28.5  27561.01  -0.53  231  2   5.049e-02   1.831e-02   3.218e-02  01   80  1.092e-01  1.091e-01  1.092e-01  1.221e-01  1.087e-01  1.353e-01  1.628e-01  1.080e-01  3.200e-01  1.000e+16  1.000e+16 
 OH93Q101  0.6259690    -1.2  26185.80   0.01  231  1   6.459e+00   3.230e+00   3.230e+00  33   16  7.961e-02  7.962e-02  7.961e-02  7.068e-02  7.068e-02  7.068e-02  1.453e-01  7.473e-02  3.680e-01  1.000e+16  1.000e+16 
 OH93Q102  0.6266947    -4.6  26242.19   0.04  231  1   2.271e+00   1.136e+00   1.136e+00  33   24  3.272e-02  3.273e-02  3.271e-02  2.419e-02  2.419e-02  2.419e-02  5.976e-02  3.071e-02  1.510e-01  1.000e+16  1.000e+16 
 OH93Q103  0.6277328   -10.6  26321.33   0.09  231  1   7.767e-01   3.883e-01   3.883e-01  33   32  1.733e-02  1.734e-02  1.732e-02  1.067e-02  1.063e-02  1.071e-02  3.168e-02  1.628e-02  8.000e-02  1.000e+16  1.000e+16 
 OH93Q104  0.6290967   -19.4  26423.32   0.17  231  2   1.816e-01   5.848e-02   1.232e-01  23   40  1.050e-02  1.051e-02  1.050e-02  5.386e-03  5.189e-03  5.584e-03  1.921e-02  9.883e-03  4.900e-02  1.000e+16  1.000e+16 
 OH93Q201  0.6258671    -4.1  26316.52   0.04  231  1   6.934e-01   3.467e-01   3.467e-01  33    8  4.558e-02  4.558e-02  4.558e-02  4.046e-02  4.046e-02  4.046e-02  8.306e-02  4.282e-02  2.100e-01  1.000e+16  1.000e+16 
 OH93Q202  0.6264466    -7.0  26355.56   0.06  231  1   1.938e-01   9.690e-02   9.690e-02  33   16  9.859e-03  9.860e-03  9.859e-03  7.289e-03  7.289e-03  7.289e-03  1.795e-02  9.295e-03  4.500e-02  1.000e+16  1.000e+16 
 OH93Q204  0.6287279    -5.9  26510.59   0.06  231  1   2.756e-02   1.378e-02   1.378e-02  03   32  2.940e-03  2.941e-03  2.938e-03  1.507e-03  1.507e-03  1.507e-03  5.328e-03  2.795e-03  1.300e-02  1.000e+16  1.000e+16 
 OH93R102  0.6237673    -0.7  26242.19   0.04  231  1   3.138e+00   1.569e+00   1.569e+00  33   24  3.179e-02  3.180e-02  3.179e-02  2.800e-02  2.800e-02  2.800e-02  6.183e-02  2.964e-02  1.680e-01  1.000e+16  1.000e+16 
 OH93R103  0.6236019    -0.4  26321.33   0.09  231  1   2.417e+00   1.209e+00   1.209e+00  33   32  3.971e-02  3.971e-02  3.970e-02  3.432e-02  3.432e-02  3.432e-02  7.958e-02  3.692e-02  2.220e-01  1.000e+16  1.000e+16 
 OH93R104  0.6237394     0.5  26423.32   0.17  231  1   1.536e+00   7.682e-01   7.682e-01  30   40  4.119e-02  4.120e-02  4.118e-02  3.493e-02  3.493e-02  3.493e-02  8.529e-02  3.820e-02  2.460e-01  1.000e+16  1.000e+16 
 OH93R106  0.6249735     4.4  26695.94   0.39  231  1   3.282e-01   1.641e-01   1.641e-01  33   56  3.802e-02  3.802e-02  3.801e-02  3.105e-02  3.105e-02  3.105e-02  8.501e-02  3.511e-02  2.630e-01  1.000e+16  1.000e+16 
 OH93R107  0.6260919     7.3  26866.42   0.54  231  1   1.731e-01   8.657e-02   8.657e-02  33   64  3.528e-02  3.528e-02  3.527e-02  2.827e-02  2.827e-02  2.827e-02  8.247e-02  3.253e-02  2.640e-01  1.000e+16  1.000e+16 
 OH93R108  0.6275578    10.9  27059.45   0.70  231  1   6.063e-02   3.031e-02   3.031e-02  30   72  3.225e-02  3.225e-02  3.224e-02  2.536e-02  2.536e-02  2.536e-02  7.924e-02  2.970e-02  2.630e-01  1.000e+16  1.000e+16 
 OH93R202  0.6243414     0.2  26355.56   0.06  231  1   9.761e-01   4.881e-01   4.881e-01  33   16  4.048e-02  4.048e-02  4.049e-02  3.565e-02  3.565e-02  3.565e-02  7.713e-02  3.779e-02  2.040e-01  1.000e+16  1.000e+16 
 OH93R203  0.6239137     1.6  26420.37   0.07  231  1   9.706e-01   4.853e-01   4.853e-01  33   24  4.519e-02  4.518e-02  4.519e-02  3.905e-02  3.905e-02  3.905e-02  8.895e-02  4.205e-02  2.440e-01  1.000e+16  1.000e+16 
 OH93R204  0.6238717     2.6  26510.59   0.06  231  1   6.843e-01   3.422e-01   3.422e-01  30   32  4.474e-02  4.474e-02  4.475e-02  3.795e-02  3.795e-02  3.795e-02  9.123e-02  4.152e-02  2.600e-01  1.000e+16  1.000e+16 
 OH93R206  0.6249095     2.6  26765.59  -0.05  231  1   1.733e-01   8.665e-02   8.665e-02  30   48  3.974e-02  3.973e-02  3.975e-02  3.246e-02  3.246e-02  3.246e-02  8.777e-02  3.671e-02  2.690e-01  1.000e+16  1.000e+16 
 OH93R208  0.6274128    -0.1  27116.99  -0.25  231  1   7.663e-02   3.831e-02   3.831e-02  03   64  3.320e-02  3.319e-02  3.320e-02  2.611e-02  2.611e-02  2.611e-02  8.074e-02  3.059e-02  2.670e-01  1.000e+16  1.000e+16 
 OH94P101  0.7796253     3.8  26185.80   0.01  532  1   5.004e+01   2.502e+01   2.502e+01  33   16  5.240e-01  5.239e-01  5.240e-01  5.294e-01  5.294e-01  5.294e-01  8.414e-01  4.644e-01  1.666e+00  4.090e-01  5.010e-01 
 OH94P102  0.7823654     7.7  26242.19   0.04  532  1   6.075e+01   3.038e+01   3.038e+01  33   24  6.448e-01  6.447e-01  6.449e-01  6.571e-01  6.571e-01  6.571e-01  1.021e+00  5.728e-01  1.987e+00  5.080e-01  6.100e-01 
 OH94P104  0.7892026    18.7  26423.32   0.17  532  2   3.248e+01   1.588e+01   1.660e+01  33   40  7.340e-01  7.339e-01  7.340e-01  7.611e-01  7.648e-01  7.573e-01  1.133e+00  6.544e-01  2.130e+00  5.870e-01  6.790e-01 
 OH94P105  0.7933311    25.5  26548.20   0.27  532  2   1.785e+01   8.547e+00   9.300e+00  11   48  7.610e-01  7.610e-01  7.611e-01  7.960e-01  8.137e-01  7.782e-01  1.161e+00  6.794e-01  2.145e+00  6.130e-01  6.960e-01 
 OH94P106  0.7979520    33.1  26695.94   0.39  532  2   8.225e+00   4.189e+00   4.037e+00  33   56  7.841e-01  7.841e-01  7.841e-01  8.273e-01  8.600e-01  7.944e-01  1.183e+00  7.007e-01  2.148e+00  6.360e-01  7.090e-01 
 OH94P107  0.8030801    41.5  26866.42   0.54  532  2   4.271e+00   2.116e+00   2.155e+00  13   64  8.045e-01  8.045e-01  8.045e-01  8.562e-01  9.048e-01  8.073e-01  1.201e+00  7.196e-01  2.144e+00  6.560e-01  7.200e-01 
 OH94P108  0.8087321    50.8  27059.45   0.71  532  2   2.260e+00   1.132e+00   1.128e+00  33   72  8.229e-01  8.230e-01  8.229e-01  8.835e-01  9.487e-01  8.175e-01  1.219e+00  7.365e-01  2.136e+00  6.740e-01  7.280e-01 
 OH94P110  0.8216866    72.1  27512.04   1.09  532  2   5.714e-01   2.793e-01   2.921e-01  33   88  8.546e-01  8.547e-01  8.544e-01  9.335e-01  1.034e+00  8.313e-01  1.247e+00  7.658e-01  2.111e+00  7.050e-01  7.490e-01 
 OH94P112  0.8370028    97.7  28050.83   1.52  532  2   6.734e-02   2.724e-02   4.011e-02  20  104  8.795e-01  8.797e-01  8.792e-01  9.775e-01  1.115e+00  8.364e-01  1.273e+00  7.895e-01  2.079e+00  7.290e-01  7.590e-01 
 OH94P201  0.7782571     4.3  26316.52   0.04  532  1   1.491e+01   7.456e+00   7.456e+00  33    8  8.302e-01  8.301e-01  8.303e-01  8.388e-01  8.388e-01  8.388e-01  1.347e+00  7.338e-01  2.706e+00  6.680e-01  8.000e-01 
 OH94P202  0.7810615     3.4  26355.56   0.06  532  1   2.116e+01   1.058e+01   1.058e+01  33   16  7.781e-01  7.780e-01  7.782e-01  7.930e-01  7.930e-01  7.930e-01  1.242e+00  6.899e-01  2.447e+00  6.280e-01  7.410e-01 
 OH94P203  0.7843424     1.2  26420.37   0.07  532  1   1.965e+01   9.823e+00   9.823e+00  33   24  7.702e-01  7.701e-01  7.704e-01  7.918e-01  7.918e-01  7.918e-01  1.211e+00  6.847e-01  2.339e+00  6.240e-01  7.240e-01 
 OH94P204  0.7880951    -2.1  26510.59   0.06  532  1   1.418e+01   7.089e+00   7.089e+00  33   32  7.766e-01  7.764e-01  7.767e-01  8.053e-01  8.053e-01  8.053e-01  1.204e+00  6.918e-01  2.281e+00  6.310e-01  7.210e-01 
 OH94P206  0.7970328   -11.3  26765.59  -0.05  532  1   4.506e+00   2.253e+00   2.253e+00  33   48  8.031e-01  8.030e-01  8.033e-01  8.474e-01  8.138e-01  8.810e-01  1.215e+00  7.175e-01  2.216e+00  6.580e-01  7.290e-01 
 OH94P207  0.8022396   -17.0  26929.47  -0.14  532  1   3.139e+00   1.570e+00   1.570e+00  33   56  8.183e-01  8.182e-01  8.185e-01  8.709e-01  8.213e-01  9.205e-01  1.225e+00  7.318e-01  2.193e+00  6.730e-01  7.340e-01 
 OH94P208  0.8079596   -23.4  27116.99  -0.25  532  2   1.377e+00   6.804e-01   6.963e-01  33   64  8.334e-01  8.332e-01  8.335e-01  8.947e-01  8.281e-01  9.610e-01  1.236e+00  7.458e-01  2.171e+00  6.880e-01  7.390e-01 
 OH94P209  0.8142126   -30.6  27327.67  -0.38  532  2   7.352e-01   4.263e-01   3.089e-01  30   72  8.478e-01  8.476e-01  8.479e-01  9.181e-01  8.338e-01  1.002e+00  1.247e+00  7.592e-01  2.150e+00  7.020e-01  7.420e-01 
 OH94P210  0.8210216   -38.6  27561.01  -0.53  532  2   5.330e-01   1.917e-01   3.412e-01  11   80  8.612e-01  8.610e-01  8.613e-01  9.407e-01  8.381e-01  1.042e+00  1.257e+00  7.717e-01  2.129e+00  7.140e-01  7.560e-01 
 OH94Q101  0.7752770    -1.8  26185.80   0.01  532  1   6.124e+01   3.062e+01   3.062e+01  33   16  6.958e-01  6.959e-01  6.958e-01  6.699e-01  6.699e-01  6.699e-01  1.160e+00  6.111e-01  2.401e+00  5.440e-01  6.850e-01 
 OH94Q102  0.7762130    -6.7  26242.19   0.04  532  1   2.367e+01   1.184e+01   1.184e+01  33   24  2.868e-01  2.869e-01  2.867e-01  2.433e-01  2.433e-01  2.433e-01  4.782e-01  2.514e-01  9.900e-01  2.250e-01  2.820e-01 
 OH94Q103  0.7775511   -15.4  26321.33   0.09  532  1   8.652e+00   4.326e+00   4.326e+00  33   32  1.524e-01  1.524e-01  1.523e-01  1.139e-01  1.134e-01  1.143e-01  2.541e-01  1.333e-01  5.260e-01  1.200e-01  1.500e-01 
 OH94Q105  0.7815002   -45.0  26548.20   0.27  532  2   7.418e-01   3.530e-01   3.887e-01  33   48  6.137e-02  6.142e-02  6.133e-02  3.562e-02  3.316e-02  3.809e-02  1.024e-01  5.352e-02  2.110e-01  4.900e-02  6.000e-02 
 OH94Q106  0.7841405   -65.6  26695.94   0.39  532  2   1.688e-01   5.998e-02   1.089e-01  22   56  4.324e-02  4.328e-02  4.320e-02  2.211e-02  1.987e-02  2.436e-02  7.213e-02  3.765e-02  1.480e-01  3.500e-02  4.300e-02 
 OH94Q107  0.7872428   -90.1  26866.42   0.54  532  2   4.913e-02   2.295e-02   2.618e-02  20   64  3.190e-02  3.193e-02  3.187e-02  1.437e-02  1.246e-02  1.631e-02  5.324e-02  2.774e-02  1.090e-01  2.600e-02  3.100e-02 
 OH94Q201  0.7751557    -6.1  26316.52   0.04  532  1   6.941e+00   3.471e+00   3.471e+00  33    8  3.976e-01  3.975e-01  3.976e-01  3.827e-01  3.827e-01  3.827e-01  6.621e-01  3.496e-01  1.370e+00  3.110e-01  3.910e-01 
 OH94Q202  0.7758994   -10.4  26355.56   0.06  532  1   1.957e+00   9.786e-01   9.786e-01  33   16  8.587e-02  8.587e-02  8.586e-02  7.284e-02  7.284e-02  7.284e-02  1.428e-01  7.565e-02  2.950e-01  6.700e-02  8.400e-02 
 OH94Q203  0.7771279   -11.6  26420.37   0.07  532  1   7.342e-01   3.671e-01   3.671e-01  33   24  4.092e-02  4.092e-02  4.091e-02  3.058e-02  3.058e-02  3.058e-02  6.792e-02  3.611e-02  1.400e-01  3.200e-02  4.000e-02 
 OH94R103  0.7714740    -1.1  26321.33   0.09  532  1   2.520e+01   1.260e+01   1.260e+01  33   32  3.672e-01  3.672e-01  3.671e-01  3.558e-01  3.558e-01  3.558e-01  6.497e-01  3.178e-01  1.439e+00  2.850e-01  3.780e-01 
 OH94R104  0.7714334    -0.2  26423.32   0.17  532  1   1.587e+01   7.934e+00   7.934e+00  33   40  3.895e-01  3.896e-01  3.894e-01  3.742e-01  3.742e-01  3.742e-01  7.032e-01  3.350e-01  1.589e+00  2.990e-01  4.060e-01 
 OH94R105  0.7717971     1.7  26548.20   0.27  532  1   8.087e+00   4.043e+00   4.043e+00  33   48  3.896e-01  3.897e-01  3.896e-01  3.711e-01  3.711e-01  3.711e-01  7.189e-01  3.326e-01  1.657e+00  2.970e-01  4.120e-01 
 OH94R107  0.7737964     8.1  26866.42   0.54  532  1   1.665e+00   8.324e-01   8.324e-01  33   64  3.630e-01  3.630e-01  3.629e-01  3.398e-01  3.398e-01  3.398e-01  7.038e-01  3.046e-01  1.688e+00  2.710e-01  3.970e-01 
 OH94R108  0.7754588    12.6  27059.45   0.70  532  1   8.417e-01   4.208e-01   4.208e-01  33   72  3.435e-01  3.436e-01  3.434e-01  3.188e-01  3.188e-01  3.188e-01  6.852e-01  2.854e-01  1.677e+00  2.540e-01  3.830e-01 
 OH94R110  0.7801759    24.1  27512.04   1.09  532  2   1.518e-01   7.567e-02   7.611e-02  20   88  2.994e-01  2.995e-01  2.993e-01  2.730e-01  2.730e-01  2.730e-01  6.384e-01  2.431e-01  1.623e+00  2.160e-01  3.540e-01 
 OH94R202  0.7728167    -0.0  26355.56   0.06  532  1   9.484e+00   4.742e+00   4.742e+00  33   16  3.628e-01  3.627e-01  3.628e-01  3.546e-01  3.546e-01  3.546e-01  6.219e-01  3.165e-01  1.329e+00  2.740e-01  3.650e-01 
 OH94R203  0.7720175     2.1  26420.37   0.07  532  1   1.014e+01   5.071e+00   5.071e+00  33   24  4.135e-01  4.134e-01  4.135e-01  4.007e-01  4.007e-01  4.007e-01  7.235e-01  3.587e-01  1.581e+00  3.110e-01  4.220e-01 
 OH94R204  0.7717173     3.7  26510.59   0.06  532  1   7.171e+00   3.585e+00   3.585e+00  33   32  4.191e-01  4.191e-01  4.192e-01  4.027e-01  4.027e-01  4.027e-01  7.494e-01  3.612e-01  1.676e+00  3.140e-01  4.340e-01 
 OH94R207  0.7737071     3.2  26929.47  -0.14  532  1   1.220e+00   6.102e-01   6.102e-01  33   56  3.733e-01  3.733e-01  3.734e-01  3.495e-01  3.495e-01  3.495e-01  7.190e-01  3.139e-01  1.722e+00  2.740e-01  4.070e-01 
 OH94R208  0.7753177     1.3  27116.99  -0.25  532  1   6.050e-01   3.025e-01   3.025e-01  30   64  3.513e-01  3.513e-01  3.514e-01  3.260e-01  3.260e-01  3.260e-01  6.967e-01  2.924e-01  1.705e+00  2.560e-01  3.900e-01 
 OH95P102  1.0126782    11.4  26242.19   0.04  300  1   3.605e+02   1.802e+02   1.802e+02  33   24  3.973e+00  3.973e+00  3.973e+00  3.910e+00  3.910e+00  3.910e+00  5.799e+00  3.617e+00  9.889e+00  3.563e+00  5.411e+00 
 OH95P104  1.0228593    27.5  26423.32   0.17  301  2   1.919e+02   9.552e+01   9.638e+01  33   40  4.469e+00  4.469e+00  4.469e+00  4.339e+00  4.360e+00  4.317e+00  6.403e+00  4.075e+00  1.065e+01  4.045e+00  5.971e+00 
 OH95P106  1.0356839    48.4  26695.94   0.39  228  2   4.035e+01   2.225e+01   1.810e+01  30   56  4.722e+00  4.723e+00  4.722e+00  4.523e+00  4.702e+00  4.343e+00  6.639e+00  4.310e+00  1.077e+01  4.313e+00  6.225e+00 
 OH95P201  1.0063470     6.6  26316.52   0.04  300  1   9.391e+01   4.696e+01   4.696e+01  33    8  5.171e+00  5.170e+00  5.171e+00  5.123e+00  5.123e+00  5.123e+00  7.668e+00  4.699e+00  1.340e+01  4.750e+00  7.202e+00 
 OH95P204  1.0211579    -3.1  26510.59   0.06  300  1   8.247e+01   4.124e+01   4.124e+01  33   32  4.740e+00  4.739e+00  4.741e+00  4.602e+00  4.602e+00  4.602e+00  6.811e+00  4.321e+00  1.142e+01  4.353e+00  6.360e+00 
 OH95P206  1.0342866   -16.6  26765.59  -0.05  228  1   3.054e+01   1.527e+01   1.527e+01  30   48  4.844e+00  4.844e+00  4.845e+00  4.640e+00  4.456e+00  4.824e+00  6.823e+00  4.422e+00  1.114e+01  4.468e+00  6.400e+00 
 OH95Q101  1.0015549    -2.8  26185.80   0.01  301  1   3.996e+02   1.998e+02   1.998e+02  33   16  4.386e+00  4.386e+00  4.385e+00  4.222e+00  4.222e+00  4.222e+00  6.611e+00  3.976e+00  1.179e+01  3.961e+00  6.278e+00 
 OH95Q102  1.0028198   -10.5  26242.19   0.04  300  1   1.605e+02   8.024e+01   8.024e+01  33   24  1.810e+00  1.810e+00  1.810e+00  1.672e+00  1.672e+00  1.672e+00  2.727e+00  1.639e+00  4.864e+00  1.639e+00  2.599e+00 
 OH95Q103  1.0046268   -24.3  26321.33   0.09  301  2   6.203e+01   3.066e+01   3.136e+01  33   32  9.625e-01  9.628e-01  9.622e-01  8.533e-01  8.499e-01  8.567e-01  1.448e+00  8.709e-01  2.582e+00  8.750e-01  1.388e+00 
 OH95Q104  1.0069993   -44.6  26423.32   0.17  299  2   2.080e+01   1.085e+01   9.951e+00  33   40  5.854e-01  5.857e-01  5.851e-01  4.981e-01  4.799e-01  5.163e-01  8.791e-01  5.293e-01  1.566e+00  5.350e-01  8.490e-01 
 OH95Q106  1.0135237  -104.3  26695.94   0.39  299  2   2.082e+00   4.362e-01   1.646e+00  20   56  2.732e-01  2.734e-01  2.730e-01  2.141e-01  1.924e-01  2.359e-01  4.081e-01  2.470e-01  7.240e-01  2.520e-01  4.020e-01 
 OH95Q201  1.0014084    -9.7  26316.52   0.04  300  1   4.234e+01   2.117e+01   2.117e+01  33    8  2.502e+00  2.502e+00  2.502e+00  2.408e+00  2.408e+00  2.408e+00  3.770e+00  2.271e+00  6.720e+00  2.258e+00  3.578e+00 
 OH95Q202  1.0024083   -16.7  26355.56   0.06  300  1   1.443e+01   7.215e+00   7.215e+00  33   16  5.388e-01  5.388e-01  5.388e-01  4.978e-01  4.978e-01  4.978e-01  8.104e-01  4.904e-01  1.444e+00  4.870e-01  7.720e-01 
 OH95Q203  1.0040612   -18.8  26420.37   0.07  299  1   5.876e+00   2.938e+00   2.938e+00  30   24  2.559e-01  2.559e-01  2.559e-01  2.269e-01  2.269e-01  2.269e-01  3.838e-01  2.335e-01  6.830e-01  2.310e-01  3.680e-01 
 OH95R103  0.9949238    -2.5  26321.33   0.09  300  1   1.614e+02   8.072e+01   8.072e+01  33   32  2.374e+00  2.374e+00  2.374e+00  2.420e+00  2.420e+00  2.420e+00  3.704e+00  2.145e+00  6.930e+00  2.167e+00  3.631e+00 
 OH95R109  1.0005233    20.9  27274.76   0.89  300  1   3.838e+00   1.919e+00   1.919e+00  30   80  2.241e+00  2.241e+00  2.240e+00  2.378e+00  2.378e+00  2.378e+00  3.724e+00  1.999e+00  7.595e+00  2.072e+00  4.116e+00 
 OH95R202  0.9975082    -0.4  26355.56   0.06  301  1   6.015e+01   3.008e+01   3.008e+01  33   16  2.313e+00  2.313e+00  2.314e+00  2.342e+00  2.342e+00  2.342e+00  3.546e+00  2.094e+00  6.463e+00  2.047e+00  3.412e+00 
 OH95R206  0.9952424     7.5  26765.59  -0.05  300  1   1.693e+01   8.467e+00   8.467e+00  33   48  2.615e+00  2.615e+00  2.616e+00  2.720e+00  2.720e+00  2.720e+00  4.194e+00  2.352e+00  8.170e+00  2.352e+00  4.306e+00 
 OH95R208  0.9980135     4.5  27116.99  -0.25  299  1   3.960e+00   1.980e+00   1.980e+00  30   64  2.400e+00  2.400e+00  2.400e+00  2.530e+00  2.530e+00  2.530e+00  3.937e+00  2.148e+00  7.928e+00  2.182e+00  4.243e+00 
 OH95R209  1.0003662     1.3  27327.67  -0.38  300  1   4.025e+00   2.012e+00   2.012e+00  30   72  2.278e+00  2.277e+00  2.278e+00  2.417e+00  2.417e+00  2.417e+00  3.777e+00  2.033e+00  7.733e+00  2.084e+00  4.191e+00 
 OH95R210  1.0033760    -3.0  27561.01  -0.53  298  1   9.613e-01   4.807e-01   4.807e-01  30   80  2.150e+00  2.150e+00  2.151e+00  2.298e+00  2.298e+00  2.298e+00  3.605e+00  1.914e+00  7.502e+00  1.982e+00  4.103e+00 
