# Supplementary material for: OH level populations and accuracies of Einstein- A coefficients from hundreds of measured lines
Source: Copernicus journal article supplement (doi:10.5194/acp-20-5269-2020), 2020-05-06
Supplement: Supplementary file 2 [file acp-20-5269-2020-supplement.zip › OHpop_Acoeff_figdata/OHpop_Acoeff_fig04.dat]

# Data for Fig. 4 in
# 'OH level populations and accuracies of Einstein-A coefficients
# from hundreds of measured lines'
# by Noll et al.
#
# Columns:
# (1) line ID of type 'OH'+v'+v''+branch+F'+N'
# (2) E'(v',N',F') - E'(v',1,1) in cm^(-1)
# (3) UVES-based versus B+16-based line wavelength in pm
#
#       1       2      3
 OH30P104   316.9  -0.34 
 OH30P105   484.7  -1.17 
 OH30P106   683.8  -1.93 
 OH30P107   914.1   3.79 
 OH40P104   304.2  -0.32 
 OH40P105   465.1  -0.12 
 OH40P106   655.9  -0.63 
 OH40P207   931.9  -2.18 
 OH40P210  1758.7  -0.17 
 OH40P112  2421.5  -0.48 
 OH40P113  2816.3  -0.12 
 OH40P214  3271.0  -1.76 
 OH40P220  6342.9   0.36 
 OH40P222  7559.2   1.30 
 OH40P124  8839.2   1.55 
 OH50P105   445.5  -1.53 
 OH50P106   628.0  -0.71 
 OH50P108  1078.7  -1.13 
 OH50P109  1346.4  -0.44 
 OH50P209  1393.3   0.02 
 OH50P111  1965.0   0.05 
 OH50P113  2692.2   0.38 
 OH50P115  3524.1  -2.33 
 OH50P116  3977.9  -1.33 
 OH50P216  4008.0   0.88 
 OH50P120  6030.9  -4.09 
 OH51P104   291.5  -0.42 
 OH51P105   445.5  -0.54 
 OH51P106   628.0  -2.24 
 OH51P107   839.2  -0.79 
 OH51P108  1078.7  -0.42 
 OH51P208  1130.0  -1.16 
 OH51P212  2352.9  -0.48 
 OH51P113  2692.2  -0.45 
 OH51P214  3128.7  -1.15 
 OH51P115  3524.1  -1.23 
 OH51P215  3555.7  -1.00 
 OH51P216  4008.0  -0.39 
 OH51P217  4485.0  -1.13 
 OH51P119  5483.4  -0.23 
 OH51P120  6030.9   2.29 
 OH51P122  7190.0  16.31 
 OH51P222  7214.0   9.52 
 OH51P123  7800.0  19.92 
 OH61P105   425.6  -0.42 
 OH61P106   599.9  -0.41 
 OH61P107   801.3  -0.17 
 OH61P208  1082.4   0.38 
 OH61P109  1284.8  -0.04 
 OH61P209  1333.2  -0.27 
 OH61P210  1611.1  -0.20 
 OH61P111  1874.4   0.80 
 OH61P112  2207.9  -0.60 
 OH61P212  2246.6  -1.92 
 OH61P117  4244.3   0.21 
 OH61P119  5219.8   5.44 
 OH61P219  5247.1  -4.51 
 OH61P120  5739.3   2.08 
 OH61P220  5765.7   0.87 
 OH62P104   278.6  -0.17 
 OH62P105   425.6  -1.12 
 OH62P106   599.9  -0.65 
 OH62P207   859.3  -1.52 
 OH62P108  1029.7  -0.73 
 OH62P208  1082.4  -0.38 
 OH62P109  1284.8  -0.70 
 OH62P209  1333.2  -0.41 
 OH62P111  1874.4  -1.31 
 OH62P212  2246.6  -0.31 
 OH62P113  2566.8  -0.75 
 OH62P213  2603.2  -0.55 
 OH62P114  2950.4  -0.12 
 OH62P214  2984.8  -0.22 
 OH62P115  3358.3   0.07 
 OH62P215  3390.9  -1.46 
 OH62P118  4721.2   2.37 
 OH62P119  5219.8   7.63 
 OH71P106   571.1  -2.15 
 OH71P110  1489.5  -0.98 
 OH71P113  2438.5   0.36 
 OH71P115  3188.5  -0.37 
 OH72P105   405.4  -0.35 
 OH72P108   979.6  -0.28 
 OH72P208  1033.9   0.00 
 OH72P209  1271.8  -0.41 
 OH72P110  1489.5  -0.53 
 OH72P210  1535.5  -0.39 
 OH72P111  1781.7  -0.67 
 OH72P212  2138.1  -0.86 
 OH72P113  2438.5  -0.90 
 OH72P214  2837.6  -0.99 
 OH72P115  3188.5  -0.72 
 OH73P104   265.4  -0.39 
 OH73P105   405.4  -0.03 
 OH73P106   571.1  -0.37 
 OH73P107   762.6  -0.48 
 OH73P208  1033.9  -1.51 
 OH73P109  1222.1  -0.05 
 OH73P209  1271.8  -0.35 
 OH73P210  1535.5   0.03 
 OH73P212  2138.1  -0.48 
 OH73P113  2438.5  -1.81 
 OH73P213  2476.0  -0.53 
 OH73P114  2802.1   0.95 
 OH73P214  2837.6   0.49 
 OH73P115  3188.5  -1.41 
 OH82P105   384.4  -0.32 
 OH82P106   541.4  -0.19 
 OH82P107   722.6  -0.65 
 OH82P108   927.9   0.10 
 OH82P209  1208.4  -1.52 
 OH82P110  1409.9   0.03 
 OH82P211  1730.0   0.62 
 OH82P212  2025.9   0.75 
 OH82P213  2344.4  -2.68 
 OH82P114  2648.4  -0.26 
 OH83P105   384.4  -0.38 
 OH83P106   541.4  -0.31 
 OH83P108   927.9  -0.36 
 OH83P208   983.8  -0.26 
 OH83P210  1457.3  -0.69 
 OH83P211  1730.0  -0.37 
 OH83P115  3012.3   5.21 
 OH83P215  3047.1  -0.71 
 OH84P104   251.8  -0.41 
 OH84P105   384.4   0.31 
 OH84P106   541.4  -0.46 
 OH84P107   722.6  -0.76 
 OH84P207   783.9  -0.27 
 OH84P208   983.8   2.58 
 OH84P209  1208.4   0.07 
 OH84P212  2025.9  -3.65 
 OH93P105   362.4  -0.24 
 OH93P106   510.1  -0.00 
 OH93P107   680.6  -0.57 
 OH93P108   873.6  -0.58 
 OH93P208   931.2  -0.93 
 OH94P104   237.5  -0.46 
 OH94P106   510.1  -0.34 
 OH94P108   873.6  -0.51 
 OH94P208   931.2  -0.36 
 OH94P209  1141.9   0.19 
 OH94P110  1326.2  -0.68 
 OH95P104   237.5  -1.19 
 OH95P106   510.1  -1.73 
 OH30P104   316.9  -0.40 
 OH30P105   484.7  -2.10 
 OH30P106   683.8  -0.42 
 OH30P107   914.1   2.52 
 OH40P104   304.2  -0.32 
 OH40P105   465.1  -0.58 
 OH40P106   655.9  -0.69 
 OH40P207   931.9  -1.94 
 OH40P210  1758.7  -0.86 
 OH40P112  2421.5  -1.59 
 OH40P113  2816.3  -0.26 
 OH40P214  3271.0  -2.69 
 OH40P220  6342.9  -0.95 
 OH40P222  7559.2   0.50 
 OH40P124  8839.2  -0.55 
 OH50P105   445.5  -0.61 
 OH50P106   628.0  -1.41 
 OH50P108  1078.7   1.19 
 OH50P109  1346.4   1.18 
 OH50P209  1393.3  -0.40 
 OH50P111  1965.0   2.30 
 OH50P113  2692.2   1.08 
 OH50P115  3524.1   1.52 
 OH50P116  3977.9   0.08 
 OH50P216  4008.0  -0.79 
 OH50P120  6030.9   3.39 
 OH51P104   291.5  -0.52 
 OH51P105   445.5  -0.27 
 OH51P106   628.0   0.18 
 OH51P107   839.2  -1.04 
 OH51P108  1078.7  -0.35 
 OH51P208  1130.0  -0.68 
 OH51P212  2352.9  -0.54 
 OH51P113  2692.2  -0.72 
 OH51P214  3128.7  -0.38 
 OH51P115  3524.1  -0.95 
 OH51P215  3555.7  -1.21 
 OH51P216  4008.0  -0.78 
 OH51P217  4485.0  -1.52 
 OH51P119  5483.4   3.36 
 OH51P120  6030.9   4.63 
 OH51P122  7190.0  15.80 
 OH51P222  7214.0  17.40 
 OH51P123  7800.0  34.12 
 OH61P105   425.6  -0.27 
 OH61P106   599.9  -0.61 
 OH61P107   801.3  -0.19 
 OH61P208  1082.4  -0.41 
 OH61P109  1284.8  -0.72 
 OH61P209  1333.2  -0.44 
 OH61P210  1611.1  -0.24 
 OH61P111  1874.4   0.27 
 OH61P112  2207.9  -0.72 
 OH61P212  2246.6  -1.01 
 OH61P117  4244.3  -2.46 
 OH61P119  5219.8   2.39 
 OH61P219  5247.1   1.96 
 OH61P120  5739.3   4.08 
 OH61P220  5765.7   4.92 
 OH62P104   278.6  -0.11 
 OH62P105   425.6  -0.94 
 OH62P106   599.9  -0.63 
 OH62P207   859.3   1.30 
 OH62P108  1029.7  -0.68 
 OH62P208  1082.4  -0.35 
 OH62P109  1284.8  -0.66 
 OH62P209  1333.2  -0.69 
 OH62P111  1874.4  -1.03 
 OH62P212  2246.6  -0.86 
 OH62P113  2566.8  -0.49 
 OH62P213  2603.2  -0.22 
 OH62P114  2950.4  -0.29 
 OH62P214  2984.8  -0.76 
 OH62P115  3358.3  -0.81 
 OH62P215  3390.9  -0.28 
 OH62P118  4721.2   1.70 
 OH62P119  5219.8   1.10 
 OH71P106   571.1  -1.09 
 OH71P110  1489.5  -0.19 
 OH71P113  2438.5  -0.55 
 OH71P115  3188.5  -3.99 
 OH72P105   405.4  -0.11 
 OH72P108   979.6  -0.39 
 OH72P208  1033.9  -0.04 
 OH72P209  1271.8  -0.36 
 OH72P110  1489.5  -0.80 
 OH72P210  1535.5  -0.54 
 OH72P111  1781.7  -0.56 
 OH72P212  2138.1  -0.56 
 OH72P113  2438.5  -0.60 
 OH72P214  2837.6  -0.49 
 OH72P115  3188.5  -0.75 
 OH73P104   265.4  -0.23 
 OH73P105   405.4   0.19 
 OH73P106   571.1  -0.13 
 OH73P107   762.6   0.00 
 OH73P208  1033.9  -0.99 
 OH73P109  1222.1   0.01 
 OH73P209  1271.8  -0.36 
 OH73P210  1535.5   0.21 
 OH73P212  2138.1  -1.12 
 OH73P113  2438.5  -2.69 
 OH73P213  2476.0  -2.18 
 OH73P114  2802.1   0.76 
 OH73P214  2837.6  -1.10 
 OH73P115  3188.5  -3.97 
 OH82P105   384.4  -0.18 
 OH82P106   541.4  -0.42 
 OH82P107   722.6  -0.04 
 OH82P108   927.9   1.33 
 OH82P209  1208.4  -1.88 
 OH82P110  1409.9  -1.01 
 OH82P211  1730.0   0.28 
 OH82P212  2025.9  -0.52 
 OH82P213  2344.4  -2.43 
 OH82P114  2648.4   0.83 
 OH83P105   384.4  -0.32 
 OH83P106   541.4  -0.23 
 OH83P108   927.9  -0.31 
 OH83P208   983.8  -0.20 
 OH83P210  1457.3  -0.76 
 OH83P211  1730.0  -0.23 
 OH83P115  3012.3  -0.08 
 OH83P215  3047.1  -2.60 
 OH84P104   251.8  -0.30 
 OH84P105   384.4  -0.07 
 OH84P106   541.4  -0.04 
 OH84P107   722.6  -0.44 
 OH84P207   783.9  -0.20 
 OH84P208   983.8  -1.21 
 OH84P209  1208.4   0.11 
 OH84P212  2025.9  -1.87 
 OH93P105   362.4  -0.33 
 OH93P106   510.1  -0.20 
 OH93P107   680.6  -0.61 
 OH93P108   873.6  -0.37 
 OH93P208   931.2   0.62 
 OH94P104   237.5  -0.29 
 OH94P106   510.1  -0.36 
 OH94P108   873.6  -0.44 
 OH94P208   931.2  -0.32 
 OH94P209  1141.9   0.13 
 OH94P110  1326.2  -0.65 
 OH95P104   237.5   0.70 
 OH95P106   510.1   0.02 
 OH40P107   876.7  -0.23 
 OH40P110  1716.5  -0.55 
 OH40P212  2458.0   0.30 
 OH40P213  2850.6  -0.81 
 OH40P115  3687.9  -0.17 
 OH40P215  3718.6  -1.04 
 OH40P217  4693.2  -0.58 
 OH40P119  5743.1   1.06 
 OH40P219  5768.9  -0.44 
 OH40P120  6318.0  -0.35 
 OH50P211  2005.3  -0.85 
 OH50P112  2315.3  -1.27 
 OH50P118  4958.3  -1.83 
 OH50P218  4985.9   4.85 
 OH51P207   895.8  -0.58 
 OH51P109  1346.4  -0.21 
 OH51P209  1393.3  -0.06 
 OH51P117  4456.2  -2.28 
 OH51P221  6624.8  11.67 
 OH61P110  1566.5   0.15 
 OH61P211  1915.8  -0.23 
 OH61P113  2566.8  -0.58 
 OH61P213  2603.2  -0.48 
 OH61P114  2950.4  -0.89 
 OH61P115  3358.3   0.10 
 OH62P210  1611.1  -0.78 
 OH62P211  1915.8  -0.99 
 OH62P112  2207.9  -0.47 
 OH62P116  3789.8   0.53 
 OH62P219  5247.1   4.99 
 OH71P107   762.6   2.32 
 OH71P112  2098.2   0.39 
 OH71P116  3597.0   0.40 
 OH71P219  4977.3  -0.46 
 OH72P107   762.6  -0.30 
 OH72P109  1222.1  -0.45 
 OH72P213  2476.0  -0.47 
 OH72P114  2802.1  -0.96 
 OH72P117  4027.1  -0.12 
 OH72P217  4057.7   0.74 
 OH73P207   822.2  -0.21 
 OH73P110  1489.5  -0.01 
 OH73P112  2098.2  -0.99 
 OH73P215  3222.1  -1.87 
 OH73P216  3629.1   2.45 
 OH73P217  4057.7  -2.30 
 OH73P118  4478.0   4.46 
 OH82P208   983.8   0.51 
 OH82P210  1457.3  -0.10 
 OH82P113  2305.6  -0.69 
 OH83P109  1157.1  -0.61 
 OH83P209  1208.4  -1.44 
 OH83P112  1984.6  -1.82 
 OH83P113  2305.6  -0.27 
 OH83P213  2344.4  -2.47 
 OH83P116  3396.8  -0.03 
 OH83P216  3430.0   0.01 
 OH84P108   927.9  -0.74 
 OH84P111  1685.9  -1.04 
 OH93P109  1089.0   0.35 
 OH93P210  1375.2  -1.08 
 OH93P111  1585.1  -0.19 
 OH94P105   362.4  -0.27 
 OH94P107   680.6  -0.26 
 OH94P210  1375.2  -0.93 
 OH40P108  1127.2  -0.65 
 OH40P111  2054.8  -0.64 
 OH40P114  3238.6  -0.28 
 OH40P116  4163.7  -0.42 
 OH40P117  4665.2  -0.49 
 OH40P218  5218.7  -1.54 
 OH40P121  6915.8  -0.61 
 OH40P221  6939.9   0.16 
 OH40P123  8177.3  -0.48 
 OH40P223  8199.9   1.88 
 OH40P224  8861.3   1.97 
 OH50P210  1685.3   0.47 
 OH50P213  2727.5  -0.73 
 OH50P214  3128.7   0.02 
 OH51P110  1641.9  -1.68 
 OH51P111  1965.0  -0.76 
 OH51P211  2005.3  -1.62 
 OH51P213  2727.5  -0.95 
 OH51P114  3095.3  -0.62 
 OH51P118  4958.3   1.72 
 OH51P219  5510.0   1.80 
 OH51P220  6056.5   3.03 
 OH51P223  7823.3  25.04 
 OH61P214  2984.8  -0.58 
 OH61P215  3390.9   0.15 
 OH61P116  3789.8  -0.10 
 OH61P118  4721.2   2.82 
 OH62P107   801.3  -0.54 
 OH62P110  1566.5  -0.57 
 OH62P217  4274.0  -1.24 
 OH62P218  4749.7   3.26 
 OH71P211  1824.4  -0.61 
 OH71P217  4057.7   1.56 
 OH72P106   571.1  -0.17 
 OH72P218  4507.4   1.48 
 OH73P108   979.6   0.08 
 OH73P111  1781.7  -1.05 
 OH82P109  1157.1  -0.72 
 OH82P112  1984.6  -0.59 
 OH83P107   722.6  -0.49 
 OH83P111  1685.9  -0.29 
 OH83P212  2025.9  -0.36 
 OH83P114  2648.4  -0.70 
 OH83P214  2685.0  -0.83 
 OH83P217  3832.9   2.95 
 OH84P109  1157.1  -0.63 
 OH84P210  1457.3  -1.73 
 OH84P211  1730.0  -1.12 
 OH84P112  1984.6  -0.40 
 OH93P110  1326.2  -0.27 
 OH94P112  1865.0  -0.97 
