# Supplementary material for: OH level populations and accuracies of Einstein- A coefficients from hundreds of measured lines
Source: Copernicus journal article supplement (doi:10.5194/acp-20-5269-2020), 2020-05-06
Supplement: Supplementary file 2 [file acp-20-5269-2020-supplement.zip › OHpop_Acoeff_figdata/OHpop_Acoeff_fig05.dat]

# Data for Fig. 5 in
# 'OH level populations and accuracies of Einstein-A coefficients
# from hundreds of measured lines'
# by Noll et al.
#
# Columns:
# (1) line ID of type 'OH'+v'+v''+branch+F'+N'
# (2) upper state energy E' in cm^(-1)
# Logarithmic population y for Einstein-A coefficients from
# (3) B+16
# (4) HITRAN
# (5) vdLG08
# (6) TL89
# (7) LWR86
# (8) M74
# Remark: -9.999 for missing values
#
#       1        2       3       4       5       6       7       8
 OH30P101  10210.6   4.006   3.654   4.059   3.079   4.148   3.861 
 OH30P102  10285.5   3.456   3.113   3.509   2.552   3.593   3.321 
 OH30P103  10391.0   2.652   2.318   2.704   1.771   2.783   2.526 
 OH30P104  10527.5   1.560   1.234   1.612   0.701   1.687   1.443 
 OH30P105  10695.3   0.420   0.103   0.473  -0.416   0.546   0.313 
 OH30P106  10894.3  -1.005  -1.314  -0.951  -1.818  -0.882  -1.105 
 OH30P107  11124.7  -1.726  -2.027  -1.672  -2.516  -1.607  -1.819 
 OH30P201  10338.7   3.014   2.656   3.069   2.068   3.126   2.864 
 OH30P202  10392.5   2.607   2.259   2.661   1.688   2.722   2.468 
 OH30P204  10605.5   1.002   0.674   1.055   0.134   1.117   0.882 
 OH30P205  10763.3  -0.025  -0.344   0.028  -0.868   0.091  -0.135 
 OH30Q101  10210.6   3.928   3.551   3.984   2.941   4.061   3.758 
 OH30Q102  10285.5   3.360   2.984   3.418   2.374   3.490   3.191 
 OH30Q103  10391.0   2.565   2.188   2.625   1.578   2.693   2.393 
 OH30Q104  10527.5   1.444   1.068   1.506   0.459   1.571   1.279 
 OH30Q105  10695.3   0.211  -0.164   0.275  -0.764   0.335   0.047 
 OH30Q201  10338.7   3.020   2.644   3.075   2.033   3.155   2.852 
 OH30Q202  10392.5   2.529   2.155   2.581   1.548   2.659   2.367 
 OH30Q204  10605.5   0.731   0.360   0.778  -0.235   0.843   0.571 
 OH30R102  10285.5   3.440   3.037   3.497   2.389   3.563   3.246 
 OH30R103  10391.0   2.639   2.224   2.698   1.561   2.774   2.430 
 OH30R104  10527.5   1.654   1.226   1.715   0.547   1.791   1.433 
 OH30R106  10894.3  -0.846  -1.302  -0.779  -2.012  -0.694  -1.097 
 OH30R108  11386.1  -2.351  -2.839  -2.276  -3.581  -2.190  -2.639 
 OH30R202  10392.5   2.633   2.237   2.691   1.603   2.792   2.445 
 OH30R203  10481.7   1.981   1.572   2.040   0.920   2.140   1.778 
 OH30R204  10605.5   1.084   0.662   1.146  -0.009   1.246   0.868 
 OH30R205  10763.3  -0.018  -0.455   0.046  -1.143   0.145  -0.251 
 OH30R207  11178.5  -1.992  -2.460  -1.921  -3.185  -1.821  -2.255 
 OH30R209  11723.1  -2.803  -3.306  -2.723  -4.065  -2.625  -3.107 
 OH40P101  13287.2   3.593   3.073   3.522   2.299   3.787   3.406 
 OH40P102  13359.1   3.097   2.593   3.027   1.838   3.280   2.944 
 OH40P103  13460.4   2.360   1.871   2.292   1.140   2.520   2.233 
 OH40P104  13591.4   1.352   0.878   1.286   0.165   1.514   1.239 
 OH40P105  13752.3   0.290  -0.170   0.226  -0.864   0.467   0.216 
 OH40P106  13943.1  -0.989  -1.435  -1.051  -2.111  -0.826  -1.031 
 OH40P112  15708.7  -2.565  -2.940  -2.604  -3.506  -2.380  -2.126 
 OH40P113  16103.4  -2.748  -3.112  -2.781  -3.654  -2.568  -2.240 
 OH40P124  22126.4  -4.000  -4.239  -3.916  -9.999  -9.999  -9.999 
 OH40P201  13415.9   2.598   2.068   2.528   1.278   2.743   2.397 
 OH40P202  13467.3   2.217   1.705   2.148   0.941   2.373   2.040 
 OH40P203  13552.5   1.594   1.099   1.526   0.354   1.746   1.447 
 OH40P204  13670.8   0.774   0.296   0.709  -0.428   0.941   0.659 
 OH40P206  14004.7  -1.056  -1.505  -1.118  -2.187  -0.894  -1.094 
 OH40P207  14219.1  -2.018  -2.453  -2.077  -3.115  -1.856  -2.016 
 OH40P210  15045.9  -2.736  -3.134  -2.784  -3.736  -2.558  -2.400 
 OH40P213  16137.8  -2.913  -3.277  -2.946  -3.822  -2.730  -2.428 
 OH40P214  16558.2  -3.123  -3.477  -3.150  -4.005  -2.947  -2.570 
 OH40P220  19630.0  -3.494  -3.781  -3.465  -9.999  -9.999  -9.999 
 OH40P221  20227.1  -3.402  -3.677  -3.360  -9.999  -9.999  -9.999 
 OH40P222  20846.4  -3.744  -4.008  -3.689  -9.999  -9.999  -9.999 
 OH40Q101  13287.2   3.603   3.040   3.530   2.216   3.775   3.379 
 OH40Q102  13359.1   2.940   2.377   2.869   1.549   3.117   2.734 
 OH40Q103  13460.4   2.057   1.493   1.988   0.660   2.218   1.900 
 OH40Q104  13591.4   0.910   0.347   0.843  -0.491   1.036   0.699 
 OH40Q105  13752.3  -0.360  -0.923  -0.426  -1.751  -0.142  -0.429 
 OH40Q201  13415.9   2.547   1.985   2.473   1.165   2.736   2.314 
 OH40Q202  13467.3   2.055   1.495   1.978   0.694   2.175   1.839 
 OH40Q203  13552.5   1.406   0.848   1.327   0.027   1.732   1.327 
 OH40Q204  13670.8   0.200  -0.355   0.120  -1.176   0.770   0.077 
 OH40R102  13359.1   3.034   2.422   2.955   1.551   3.225   2.797 
 OH40R103  13460.4   2.263   1.628   2.183   0.732   2.451   1.995 
 OH40R104  13591.4   1.290   0.631   1.209  -0.290   1.477   1.038 
 OH40R106  13943.1  -1.127  -1.841  -1.208  -2.805  -0.883  -1.360 
 OH40R107  14163.9  -2.014  -2.760  -2.096  -3.749  -1.770  -2.232 
 OH40R111  15341.9  -2.747  -3.646  -2.819  -4.738  -2.400  -2.400 
 OH40R112  15708.7  -2.853  -3.798  -2.919  -4.923  -2.411  -2.411 
 OH40R113  16103.4  -2.774  -3.770  -2.831  -4.922  -2.329  -2.195 
 OH40R202  13467.3   2.217   1.620   2.142   0.764   2.448   1.971 
 OH40R203  13552.5   1.570   0.948   1.493   0.060   1.818   1.317 
 OH40R204  13670.8   0.687   0.038   0.609  -0.868   0.940   0.440 
 OH40R205  13821.8  -0.366  -1.043  -0.445  -1.977  -0.093  -0.615 
 OH40R207  14219.1  -2.340  -3.079  -2.420  -4.067  -2.072  -2.571 
 OH40R210  15045.9  -2.984  -3.835  -3.060  -4.908  -2.613  -2.768 
 OH40R211  15381.1  -2.700  -3.594  -2.772  -4.688  -2.341  -2.428 
 OH40R212  15745.2  -2.878  -3.819  -2.944  -4.947  -2.425  -2.425 
 OH41P101  13287.2   3.390   3.065   3.458   2.524   3.489   3.038 
 OH41P102  13359.1   2.708   2.391   2.775   1.864   2.803   2.367 
 OH41P103  13460.4   2.390   2.082   2.457   1.567   2.482   2.059 
 OH41P201  13415.9   2.518   2.188   2.589   1.636   2.589   2.159 
 OH41P202  13467.3   2.052   1.732   2.121   1.194   2.126   1.705 
 OH41P203  13552.5   1.539   1.227   1.607   0.704   1.614   1.203 
 OH41Q102  13359.1   2.835   2.489   2.909   1.916   2.922   2.450 
 OH41Q103  13460.4   2.089   1.743   2.164   1.170   2.173   1.701 
 OH41Q104  13591.4   0.898   0.552   0.974  -0.019   0.981   0.506 
 OH41Q201  13415.9   2.113   1.768   2.184   1.194   2.203   3.236 
 OH41Q202  13467.3   1.593   1.249   1.661   0.676   1.686   1.922 
 OH41Q203  13552.5   1.092   0.749   1.156   0.178   1.188   1.157 
 OH41R102  13359.1   2.924   2.555   2.997   1.947   3.003   2.505 
 OH41R103  13460.4   2.147   1.767   2.222   1.145   2.231   1.709 
 OH41R105  13752.3   0.043  -0.360   0.122  -1.011   0.135  -0.437 
 OH41R106  13943.1  -1.128  -1.544  -1.048  -2.210  -1.034  -1.632 
 OH41R202  13467.3   2.029   1.666   2.103   1.071   2.141   1.620 
 OH41R203  13552.5   1.479   1.105   1.555   0.493   1.591   1.051 
 OH41R204  13670.8   0.584   0.198   0.661  -0.431   0.694   0.134 
 OH41R205  13821.8  -0.502  -0.902  -0.423  -1.547  -0.393  -0.976 
 OH50P101  16201.3   3.183   2.502   2.937   1.575   3.010   1.624 
 OH50P102  16270.3   2.698   2.041   2.455   1.140   2.567   1.223 
 OH50P103  16367.4   1.965   1.329   1.724   0.427   1.777   0.504 
 OH50P104  16492.8   1.045   0.429   0.803  -0.432   0.918  -0.355 
 OH50P105  16646.8  -0.133  -0.732  -0.376  -1.563  -0.213  -1.486 
 OH50P106  16829.4  -1.217  -1.800  -1.463  -2.608  -1.258  -2.490 
 OH50P109  17547.7  -2.503  -3.049  -2.761  -3.807  -2.590  -3.602 
 OH50P113  18893.6  -2.863  -3.379  -3.138  -4.058  -2.879  -3.439 
 OH50P116  20179.3  -2.919  -3.417  -3.196  -9.999  -9.999  -9.999 
 OH50P201  16330.6   2.131   1.432   1.882   0.480   1.927   0.572 
 OH50P202  16379.6   1.856   1.186   1.612   0.256   1.744   0.357 
 OH50P204  16573.7   0.450  -0.173   0.208  -1.049   0.372  -0.940 
 OH50P209  17594.7  -2.512  -3.060  -2.770  -3.808  -2.591  -3.603 
 OH50P216  20209.4  -3.142  -3.640  -3.419  -9.999  -2.988  -3.122 
 OH50Q101  16201.3   3.047   2.295   2.784   1.301   2.911   1.407 
 OH50Q102  16270.3   2.399   1.644   2.134   0.670   2.462   0.757 
 OH50Q201  16330.6   1.791   1.041   1.529   0.064   1.511   0.125 
 OH50Q202  16379.6   1.583   0.833   1.314  -0.205   1.181   0.082 
 OH50R102  16270.3   2.579   1.742   2.288   0.660   2.606   0.815 
 OH50R103  16367.4   1.829   0.949   1.521  -0.187   1.658   0.049 
 OH50R104  16492.8   0.883  -0.046   0.554  -1.216   0.730  -0.944 
 OH50R202  16379.6   1.753   0.942   1.472  -0.121   1.614   0.073 
 OH50R203  16460.8   1.072   0.215   0.774  -0.870   1.027  -0.707 
 OH51P101  16201.3   3.116   2.677   3.167   1.957   3.279   3.169 
 OH51P102  16270.3   2.602   2.176   2.652   1.474   2.758   2.658 
 OH51P103  16367.4   1.886   1.474   1.935   0.789   2.039   1.951 
 OH51P104  16492.8   0.976   0.577   1.025  -0.090   1.124   1.050 
 OH51P105  16646.8  -0.089  -0.476  -0.040  -1.124   0.053  -0.010 
 OH51P106  16829.4  -1.101  -1.474  -1.052  -2.106  -0.960  -1.016 
 OH51P107  17040.5  -2.096  -2.457  -2.046  -3.070  -1.954  -2.005 
 OH51P108  17280.0  -2.585  -2.934  -2.534  -3.530  -2.442  -2.492 
 OH51P111  18166.4  -2.732  -3.049  -2.676  -3.593  -2.586  -2.633 
 OH51P113  18893.6  -3.013  -3.309  -2.951  -3.820  -2.862  -2.909 
 OH51P115  19725.4  -3.350  -3.630  -3.281  -9.999  -3.191  -3.240 
 OH51P119  21684.7  -3.844  -4.100  -3.756  -9.999  -9.999  -9.999 
 OH51P120  22232.3  -4.072  -4.325  -3.978  -9.999  -9.999  -9.999 
 OH51P201  16330.6   2.131   1.682   2.184   0.947   2.263   2.173 
 OH51P202  16379.6   1.772   1.340   1.824   0.626   1.905   1.827 
 OH51P203  16460.8   1.181   0.764   1.232   0.070   1.316   1.241 
 OH51P204  16573.7   0.372  -0.030   0.422  -0.704   0.504   0.443 
 OH51P205  16717.8  -0.596  -0.985  -0.546  -1.640  -0.460  -0.520 
 OH51P206  16892.4  -1.629  -2.005  -1.580  -2.641  -1.496  -1.547 
 OH51P208  17331.3  -2.804  -3.154  -2.753  -3.754  -2.669  -2.710 
 OH51P212  18554.2  -3.111  -3.418  -3.052  -3.946  -2.969  -3.012 
 OH51P213  18928.9  -3.202  -3.500  -3.141  -4.010  -3.056  -3.098 
 OH51P214  19330.0  -3.452  -3.740  -3.386  -4.231  -3.298  -3.344 
 OH51P215  19757.1  -3.502  -3.783  -3.433  -4.257  -3.347  -3.393 
 OH51P216  20209.4  -3.488  -3.761  -3.414  -9.999  -3.325  -3.375 
 OH51P217  20686.3  -3.477  -3.743  -3.398  -9.999  -9.999  -9.999 
 OH51Q101  16201.3   3.064   2.589   3.121   1.824   3.222   3.090 
 OH51Q105  16646.8  -0.632  -1.103  -0.569  -1.867  -0.511  -0.622 
 OH51Q201  16330.6   2.093   1.619   2.148   0.853   2.250   2.122 
 OH51Q202  16379.6   1.958   1.486   2.011   0.721   2.128   1.974 
 OH51Q203  16460.8   1.345   0.875   1.395   0.105   1.492   1.338 
 OH51Q205  16717.8  -1.907  -2.370  -1.857  -3.100  -1.665  -1.848 
 OH51R102  16270.3   2.565   2.051   2.625   1.237   2.719   2.568 
 OH51R103  16367.4   1.820   1.289   1.883   0.455   1.982   1.801 
 OH51R105  16646.8  -0.186  -0.756  -0.115  -1.633  -0.006  -0.235 
 OH51R106  16829.4  -1.323  -1.914  -1.247  -2.812  -1.133  -1.393 
 OH51R113  18893.6  -3.169  -3.956  -3.023  -5.015  -2.839  -3.453 
 OH51R116  20179.3  -3.353  -4.270  -3.141  -9.999  -9.999  -9.999 
 OH51R202  16379.6   1.788   1.286   1.848   0.488   1.981   1.791 
 OH51R203  16460.8   1.157   0.636   1.220  -0.186   1.353   1.146 
 OH51R206  16892.4  -1.693  -2.278  -1.617  -3.171  -1.483  -1.755 
 OH51R213  18928.9  -3.509  -4.293  -3.364  -5.357  -3.170  -3.795 
 OH51R214  19330.0  -3.700  -4.523  -3.537  -5.611  -3.346  -4.028 
 OH51R215  19757.1  -3.442  -4.308  -3.258  -5.423  -3.041  -3.818 
 OH61P101  18951.9   2.792   2.130   2.688   1.248   2.798   2.840 
 OH61P102  19017.9   2.313   1.675   2.209   0.822   2.318   2.387 
 OH61P103  19110.6   1.653   1.039   1.550   0.207   1.659   1.721 
 OH61P104  19230.5   0.763   0.172   0.659  -0.641   0.773   0.863 
 OH61P105  19377.5  -0.241  -0.810  -0.345  -1.595  -0.236  -0.122 
 OH61P106  19551.7  -1.310  -1.856  -1.414  -2.620  -1.314  -1.177 
 OH61P107  19753.1  -2.026  -2.551  -2.131  -3.297  -2.041  -1.882 
 OH61P109  20236.7  -2.664  -3.146  -2.769  -3.850  -2.678  -2.477 
 OH61P111  20826.2  -2.835  -3.273  -2.938  -3.941  -2.849  -2.582 
 OH61P112  21159.8  -2.960  -3.375  -3.060  -4.021  -2.964  -2.677 
 OH61P117  23196.2  -3.663  -3.962  -3.726  -9.999  -9.999  -9.999 
 OH61P119  24171.7  -4.317  -4.570  -4.352  -9.999  -9.999  -9.999 
 OH61P201  19081.7   1.782   1.104   1.678   0.206   1.772   1.826 
 OH61P202  19128.2   1.463   0.814   1.360  -0.054   1.435   1.519 
 OH61P203  19205.5   0.930   0.307   0.827  -0.536   0.909   0.994 
 OH61P204  19312.9   0.127  -0.471   0.024  -1.288   0.105   0.216 
 OH61P205  19450.1  -0.825  -1.399  -0.928  -2.196  -0.842  -0.734 
 OH61P206  19616.3  -1.722  -2.272  -1.826  -3.046  -1.731  -1.597 
 OH61P207  19811.2  -2.205  -2.733  -2.309  -3.482  -2.229  -2.047 
 OH61P208  20034.3  -2.624  -3.130  -2.729  -3.855  -2.639  -2.461 
 OH61P209  20285.0  -2.966  -3.450  -3.072  -4.158  -2.972  -2.771 
 OH61P210  20563.0  -2.973  -3.434  -3.077  -4.119  -2.991  -2.746 
 OH61P212  21198.5  -3.139  -3.556  -3.240  -4.225  -3.140  -2.880 
 OH61P215  22342.7  -3.808  -4.156  -3.893  -4.742  -3.803  -3.463 
 OH61Q101  18951.9   2.723   1.998   2.615   1.061   2.741   2.741 
 OH61Q102  19017.9   2.110   1.386   2.002   0.446   2.151   2.151 
 OH61Q103  19110.6   1.259   0.536   1.151  -0.409   1.200   1.354 
 OH61Q201  19081.7   1.732   1.009   1.624   0.066   1.765   1.765 
 OH61Q202  19128.2   1.156   0.436   1.044  -0.485   1.125   1.125 
 OH61Q203  19205.5   0.306  -0.411   0.190  -1.361   0.249   0.249 
 OH61R102  19017.9   2.273   1.477   2.157   0.470   2.289   2.289 
 OH61R104  19230.5   0.647  -0.216   0.521  -1.278   0.631   0.631 
 OH61R105  19377.5  -0.345  -1.245  -0.478  -2.340  -0.321  -0.321 
 OH61R108  19981.5  -2.934  -3.963  -3.090  -5.157  -2.897  -2.897 
 OH61R110  20518.4  -2.997  -4.125  -3.170  -5.393  -2.978  -2.978 
 OH61R202  19128.2   1.447   0.673   1.335  -0.316   1.476   1.476 
 OH61R203  19205.5   0.860   0.050   0.743  -0.968   0.871   0.871 
 OH61R205  19450.1  -0.890  -1.778  -1.020  -2.868  -0.878  -0.878 
 OH61R208  20034.3  -2.936  -3.956  -3.090  -5.152  -2.875  -2.955 
 OH61R209  20285.0  -3.345  -4.414  -3.507  -5.643  -3.296  -3.296 
 OH62P101  18951.9   2.733   2.320   2.850   1.651   2.954   2.651 
 OH62P102  19017.9   2.250   1.848   2.365   1.196   2.466   2.178 
 OH62P103  19110.6   1.561   1.170   1.673   0.534   1.770   1.498 
 OH62P104  19230.5   0.683   0.301   0.793  -0.318   0.885   0.627 
 OH62P105  19377.5  -0.313  -0.684  -0.205  -1.288  -0.113  -0.362 
 OH62P106  19551.7  -1.372  -1.735  -1.266  -2.322  -1.177  -1.415 
 OH62P108  19981.5  -2.601  -2.947  -2.498  -3.502  -2.411  -2.634 
 OH62P109  20236.7  -2.805  -3.145  -2.704  -3.683  -2.618  -2.836 
 OH62P111  20826.2  -2.905  -3.232  -2.806  -3.738  -2.723  -2.931 
 OH62P113  21518.6  -3.134  -3.453  -3.039  -3.927  -2.958  -3.156 
 OH62P114  21902.3  -3.450  -3.765  -3.357  -4.222  -3.278  -3.470 
 OH62P115  22310.1  -3.514  -3.825  -3.422  -9.999  -3.346  -3.532 
 OH62P116  22741.6  -3.506  -3.814  -3.416  -9.999  -9.999  -9.999 
 OH62P118  23673.1  -3.780  -4.083  -3.692  -9.999  -9.999  -9.999 
 OH62P119  24171.7  -4.032  -4.333  -3.945  -9.999  -9.999  -9.999 
 OH62P201  19081.7   1.740   1.319   1.859   0.636   1.931   1.650 
 OH62P202  19128.2   1.399   0.991   1.515   0.327   1.590   1.321 
 OH62P203  19205.5   0.847   0.452   0.961  -0.194   1.038   0.780 
 OH62P204  19312.9   0.075  -0.309   0.187  -0.936   0.265   0.017 
 OH62P205  19450.1  -0.842  -1.216  -0.733  -1.825  -0.653  -0.893 
 OH62P207  19811.2  -2.265  -2.620  -2.159  -3.195  -2.078  -2.303 
 OH62P208  20034.3  -2.847  -3.195  -2.744  -3.752  -2.664  -2.880 
 OH62P209  20285.0  -3.007  -3.348  -2.906  -3.888  -2.825  -3.038 
 OH62P212  21198.5  -3.070  -3.393  -2.973  -3.910  -2.893  -3.094 
 OH62P213  21555.0  -3.391  -3.710  -3.296  -4.183  -3.218  -3.413 
 OH62P214  21936.6  -3.614  -3.929  -3.521  -4.385  -3.444  -3.634 
 OH62P215  22342.7  -3.746  -4.057  -3.654  -4.497  -3.578  -3.764 
 OH62P218  23701.5  -4.014  -4.318  -3.927  -9.999  -9.999  -9.999 
 OH62Q101  18951.9   2.669   2.224   2.794   1.514   2.886   2.556 
 OH62Q102  19017.9   2.126   1.681   2.252   0.969   2.340   2.011 
 OH62Q103  19110.6   1.359   0.913   1.487   0.204   1.577   1.239 
 OH62Q104  19230.5   0.351  -0.095   0.480  -0.804   0.563   0.229 
 OH62Q201  19081.7   1.713   1.270   1.837   0.559   1.931   1.602 
 OH62Q202  19128.2   1.246   0.803   1.367   0.095   1.469   1.133 
 OH62Q204  19312.9  -0.461  -0.902  -0.345  -1.604  -0.243  -0.579 
 OH62Q205  19450.1  -1.642  -2.082  -1.528  -2.787  -1.401  -1.757 
 OH62R102  19017.9   2.225   1.745   2.356   0.990   2.439   2.077 
 OH62R103  19110.6   1.508   1.012   1.644   0.238   1.734   1.342 
 OH62R104  19230.5   0.628   0.113   0.768  -0.680   0.863   0.440 
 OH62R107  19753.1  -2.309  -2.888  -2.153  -3.738  -2.043  -2.572 
 OH62R109  20236.7  -2.897  -3.528  -2.727  -4.418  -2.608  -3.228 
 OH62R110  20518.4  -2.971  -3.632  -2.794  -4.542  -2.668  -3.341 
 OH62R111  20826.2  -3.012  -3.707  -2.827  -4.636  -2.694  -3.424 
 OH62R112  21159.8  -3.120  -3.852  -2.927  -4.800  -2.792  -3.580 
 OH62R113  21518.6  -3.293  -4.065  -3.092  -5.034  -2.951  -3.805 
 OH62R114  21902.3  -3.486  -4.302  -3.274  -5.291  -3.125  -4.056 
 OH62R115  22310.1  -3.726  -4.593  -3.505  -9.999  -3.355  -4.358 
 OH62R117  23196.2  -3.765  -4.748  -3.519  -9.999  -9.999  -9.999 
 OH62R202  19128.2   1.377   0.908   1.507   0.167   1.629   1.239 
 OH62R203  19205.5   0.805   0.318   0.940  -0.444   1.058   0.649 
 OH62R204  19312.9   0.029  -0.477   0.169  -1.260   0.287  -0.149 
 OH62R205  19450.1  -0.920  -1.447  -0.776  -2.252  -0.654  -1.122 
 OH62R206  19616.3  -1.839  -2.389  -1.689  -3.215  -1.568  -2.069 
 OH62R207  19811.2  -2.593  -3.166  -2.437  -4.014  -2.315  -2.850 
 OH62R209  20285.0  -3.099  -3.726  -2.930  -4.617  -2.799  -3.424 
 OH62R210  20563.0  -3.222  -3.880  -3.045  -4.792  -2.911  -3.587 
 OH62R211  20867.7  -3.290  -3.981  -3.106  -4.914  -2.966  -3.698 
 OH62R212  21198.5  -3.319  -4.047  -3.127  -5.026  -2.981  -3.774 
 OH62R213  21555.0  -3.534  -4.303  -3.333  -5.279  -3.183  -4.043 
 OH62R215  22342.7  -3.958  -4.822  -3.737  -5.839  -3.578  -4.585 
 OH62R217  23225.9  -3.999  -4.979  -3.754  -9.999  -9.999  -9.999 
 OH72P101  21536.2   2.346   1.894   2.426   1.080   2.537   2.601 
 OH72P102  21599.1   1.980   1.545   2.059   0.751   2.164   2.236 
 OH72P103  21687.5   1.225   0.806   1.303   0.032   1.411   1.477 
 OH72P104  21801.7   0.411   0.009   0.489  -0.743   0.591   0.671 
 OH72P105  21941.6  -0.505  -0.891  -0.427  -1.624  -0.325  -0.249 
 OH72P107  22298.8  -2.129  -2.486  -2.050  -3.180  -1.947  -1.875 
 OH72P108  22515.9  -2.560  -2.904  -2.480  -3.576  -2.373  -2.311 
 OH72P110  23025.8  -2.925  -3.243  -2.842  -3.880  -2.728  -2.691 
 OH72P111  23317.9  -3.093  -3.402  -3.011  -4.020  -2.891  -2.870 
 OH72P113  23974.7  -3.440  -3.731  -3.357  -4.314  -3.227  -3.234 
 OH72P115  24724.7  -4.212  -4.492  -4.133  -9.999  -3.984  -4.032 
 OH72P201  21666.4   1.340   0.876   1.424   0.043   1.503   1.591 
 OH72P202  21710.6   1.042   0.598   1.123  -0.209   1.204   1.296 
 OH72P203  21783.8   0.516   0.090   0.595  -0.693   0.675   0.767 
 OH72P204  21885.7  -0.199  -0.606  -0.120  -1.367  -0.032   0.060 
 OH72P205  22015.8  -1.022  -1.412  -0.943  -2.151  -0.857  -0.767 
 OH72P206  22173.5  -1.858  -2.232  -1.779  -2.950  -1.692  -1.604 
 OH72P208  22570.1  -2.762  -3.107  -2.682  -3.783  -2.586  -2.510 
 OH72P209  22808.0  -3.085  -3.417  -3.004  -4.072  -2.901  -2.841 
 OH72P210  23071.7  -3.180  -3.501  -3.098  -4.136  -2.991  -2.947 
 OH72P212  23674.4  -3.436  -3.736  -3.353  -4.334  -3.233  -3.219 
 OH72P213  24012.3  -3.696  -3.989  -3.614  -4.566  -3.487  -3.493 
 OH72P214  24373.8  -4.077  -4.363  -3.996  -4.924  -3.862  -3.883 
 OH72P217  25593.9  -4.562  -4.837  -4.489  -9.999  -9.999  -9.999 
 OH72Q101  21536.2   2.252   1.756   2.341   0.886   2.447   2.486 
 OH72Q103  21687.5   0.919   0.425   1.014  -0.452   1.104   1.149 
 OH72Q104  21801.7  -0.160  -0.653  -0.062  -1.529   0.021   0.095 
 OH72Q105  21941.6  -1.320  -1.810  -1.218  -2.673  -1.109  -1.109 
 OH72Q201  21666.4   1.288   0.793   1.377  -0.078   0.707   1.521 
 OH72R102  21599.1   1.830   1.286   1.928   0.356   2.025   2.048 
 OH72R104  21801.7   0.303  -0.286   0.416  -1.270   0.536   0.501 
 OH72R105  21941.6  -0.660  -1.273  -0.538  -2.284  -0.417  -0.472 
 OH72R107  22298.8  -2.352  -3.021  -2.207  -4.090  -2.063  -2.201 
 OH72R108  22515.9  -2.767  -3.467  -2.608  -4.566  -2.432  -2.646 
 OH72R109  22758.3  -3.015  -3.751  -2.840  -4.878  -2.657  -2.932 
 OH72R114  24338.3  -3.960  -4.952  -3.678  -6.239  -3.285  -4.150 
 OH72R202  21710.6   0.994   0.465   1.091  -0.448   1.228   1.228 
 OH72R203  21783.8   0.447  -0.107   0.550  -1.047   0.694   0.660 
 OH72R204  21885.7  -0.326  -0.904  -0.215  -1.874  -0.073  -0.124 
 OH72R207  22358.4  -2.701  -3.363  -2.557  -4.428  -2.384  -2.541 
 OH72R208  22570.1  -3.040  -3.735  -2.883  -4.829  -2.707  -2.916 
 OH72R211  23360.7  -3.621  -4.434  -3.410  -5.626  -3.164  -3.625 
 OH72R212  23674.4  -3.795  -4.660  -3.564  -5.887  -3.259  -3.843 
 OH73P101  21536.2   2.442   2.010   2.542   1.391   2.609   2.291 
 OH73P102  21599.1   1.986   1.566   2.085   0.962   2.147   1.848 
 OH73P103  21687.5   1.344   0.934   1.441   0.345   1.498   1.217 
 OH73P104  21801.7   0.515   0.116   0.611  -0.458   0.665   0.399 
 OH73P105  21941.6  -0.437  -0.826  -0.342  -1.385  -0.292  -0.542 
 OH73P106  22107.3  -1.367  -1.747  -1.272  -2.290  -1.226  -1.462 
 OH73P107  22298.8  -2.079  -2.450  -1.985  -2.978  -1.942  -2.165 
 OH73P109  22758.3  -2.727  -3.081  -2.633  -3.579  -2.597  -2.796 
 OH73P113  23974.7  -3.450  -3.775  -3.353  -4.214  -3.329  -3.490 
 OH73P114  24338.3  -3.799  -4.118  -3.701  -4.541  -3.680  -3.834 
 OH73P115  24724.7  -4.159  -4.472  -4.059  -9.999  -4.041  -4.188 
 OH73P202  21710.6   1.170   0.744   1.270   0.128   1.307   1.024 
 OH73P203  21783.8   0.641   0.227   0.739  -0.372   0.777   0.509 
 OH73P204  21885.7  -0.087  -0.489   0.010  -1.071   0.050  -0.206 
 OH73P205  22015.8  -0.892  -1.284  -0.796  -1.849  -0.758  -1.000 
 OH73P208  22570.1  -2.593  -2.957  -2.499  -3.473  -2.466  -2.672 
 OH73P209  22808.0  -2.929  -3.284  -2.835  -3.785  -2.804  -3.000 
 OH73P210  23071.7  -3.101  -3.448  -3.006  -3.932  -2.978  -3.163 
 OH73P212  23674.4  -3.335  -3.666  -3.238  -4.119  -3.215  -3.382 
 OH73P213  24012.3  -3.832  -4.157  -3.735  -4.595  -3.714  -3.873 
 OH73P214  24373.8  -4.061  -4.380  -3.962  -4.802  -3.944  -4.096 
 OH73Q101  21536.2   2.410   1.949   2.517   1.291   2.569   2.226 
 OH73Q102  21599.1   1.923   1.461   2.030   0.803   2.080   1.737 
 OH73Q103  21687.5   1.161   0.700   1.270   0.043   1.314   0.974 
 OH73Q105  21941.6  -0.830  -1.291  -0.720  -1.945  -0.689  -1.022 
 OH73Q106  22107.3  -1.906  -2.366  -1.795  -3.015  -1.764  -2.099 
 OH73Q201  21666.4   1.461   1.001   1.566   0.462   1.621   1.277 
 OH73Q203  21783.8   0.416  -0.041   0.516  -0.694   0.573   0.230 
 OH73Q205  22015.8  -1.527  -1.981  -1.429  -2.625  -1.372  -1.713 
 OH73R102  21599.1   1.957   1.463   2.068   0.765   2.107   1.734 
 OH73R103  21687.5   1.309   0.800   1.423   0.085   1.465   1.068 
 OH73R105  21941.6  -0.452  -0.994  -0.330  -1.744  -0.286  -0.734 
 OH73R106  22107.3  -1.396  -1.957  -1.270  -2.723  -1.226  -1.701 
 OH73R110  23025.8  -2.908  -3.556  -2.757  -4.391  -2.724  -3.330 
 OH73R111  23317.9  -2.990  -3.665  -2.831  -4.516  -2.803  -3.448 
 OH73R113  23974.7  -3.469  -4.202  -3.290  -5.087  -3.274  -4.008 
 OH73R114  24338.3  -3.726  -4.492  -3.536  -5.394  -3.526  -4.314 
 OH73R116  25133.2  -4.297  -5.138  -4.078  -9.999  -9.999  -9.999 
 OH73R202  21710.6   1.205   0.721   1.315   0.037   1.392   0.994 
 OH73R203  21783.8   0.744   0.244   0.857  -0.460   0.930   0.514 
 OH73R209  22808.0  -3.009  -3.629  -2.866  -4.448  -2.817  -3.392 
 OH73R210  23071.7  -3.107  -3.753  -2.957  -4.590  -2.912  -3.525 
 OH73R212  23674.4  -3.428  -4.128  -3.261  -5.002  -3.228  -3.921 
 OH73R213  24012.3  -3.690  -4.420  -3.512  -5.313  -3.485  -4.225 
 OH73R214  24373.8  -4.225  -4.988  -4.035  -5.899  -4.016  -4.809 
 OH73R217  25593.9  -4.676  -5.558  -4.442  -9.999  -9.999  -9.999 
 OH73R218  26043.6  -5.221  -6.153  -4.969  -9.999  -9.999  -9.999 
 OH82P101  23949.8   2.312   1.647   2.218   0.723  -9.999  -9.999 
 OH82P102  24009.6   1.877   1.243   1.788   0.344  -9.999  -9.999 
 OH82P103  24093.5   1.278   0.675   1.196  -0.202  -9.999  -9.999 
 OH82P104  24201.7   0.524  -0.047   0.449  -0.900  -9.999  -9.999 
 OH82P105  24334.2  -0.329  -0.870  -0.396  -1.693  -9.999  -9.999 
 OH82P106  24491.2  -1.249  -1.759  -1.307  -2.557  -9.999  -9.999 
 OH82P107  24672.4  -1.890  -2.369  -1.938  -3.148  -9.999  -9.999 
 OH82P110  25359.8  -3.311  -3.700  -3.324  -4.416  -9.999  -9.999 
 OH82P114  26598.2  -4.871  -5.157  -4.838  -5.807  -9.999  -9.999 
 OH82P201  24080.4   1.325   0.642   1.230  -0.301  -9.999  -9.999 
 OH82P202  24122.0   1.064   0.415   0.974  -0.496  -9.999  -9.999 
 OH82P203  24191.1   0.552  -0.063   0.468  -0.947  -9.999  -9.999 
 OH82P204  24287.3  -0.065  -0.646  -0.142  -1.505  -9.999  -9.999 
 OH82P205  24410.1  -0.944  -1.492  -1.012  -2.327  -9.999  -9.999 
 OH82P206  24559.1  -1.644  -2.160  -1.703  -2.967  -9.999  -9.999 
 OH82P207  24733.7  -2.198  -2.681  -2.246  -3.467  -9.999  -9.999 
 OH82P212  25975.7  -3.955  -4.290  -3.945  -4.971  -9.999  -9.999 
 OH82P213  26294.3  -4.235  -4.545  -4.213  -5.207  -9.999  -9.999 
 OH82Q101  23949.8   2.168   1.432   2.069   0.435  -9.999  -9.999 
 OH82Q102  24009.6   1.566   0.835   1.473  -0.166  -9.999  -9.999 
 OH82Q103  24093.5   0.742   0.018   0.655  -0.996  -9.999  -9.999 
 OH82Q201  24080.4   1.252   0.517   1.152  -0.481  -9.999  -9.999 
 OH82R102  24009.6   1.766   0.952   1.663  -0.119  -9.999  -9.999 
 OH82R103  24093.5   1.139   0.292   1.039  -0.809  -9.999  -9.999 
 OH82R104  24201.7   0.332  -0.546   0.237  -1.686  -9.999  -9.999 
 OH82R106  24491.2  -1.601  -2.547  -1.677  -3.773  -9.999  -9.999 
 OH82R202  24122.0   0.939   0.149   0.838  -0.904  -9.999  -9.999 
 OH82R203  24191.1   0.415  -0.411   0.316  -1.495  -9.999  -9.999 
 OH82R204  24287.3  -0.351  -1.213  -0.446  -2.340  -9.999  -9.999 
 OH83P101  23949.8   2.267   1.777   2.344   1.026   2.548   2.248 
 OH83P102  24009.6   1.848   1.373   1.923   0.641   2.116   1.835 
 OH83P103  24093.5   1.237   0.777   1.309   0.064   1.496   1.234 
 OH83P104  24201.7   0.493   0.047   0.562  -0.647   0.740   0.498 
 OH83P105  24334.2  -0.372  -0.805  -0.305  -1.481  -0.135  -0.361 
 OH83P106  24491.2  -1.238  -1.658  -1.173  -2.314  -1.011  -1.220 
 OH83P108  24877.8  -2.480  -2.875  -2.417  -3.495  -2.270  -2.450 
 OH83P112  25934.4  -3.569  -3.922  -3.507  -4.470  -3.390  -3.484 
 OH83P114  26598.2  -4.964  -5.297  -4.897  -5.810  -4.797  -4.856 
 OH83P201  24080.4   1.296   0.794   1.376   0.026   1.545   1.267 
 OH83P202  24122.0   1.010   0.526   1.086  -0.219   1.255   0.993 
 OH83P203  24191.1   0.536   0.069   0.610  -0.654   0.775   0.529 
 OH83P204  24287.3  -0.118  -0.569  -0.047  -1.271   0.114  -0.116 
 OH83P205  24410.1  -0.875  -1.311  -0.807  -1.993  -0.649  -0.866 
 OH83P206  24559.1  -1.671  -2.093  -1.605  -2.755  -1.455  -1.655 
 OH83P207  24733.7  -2.298  -2.707  -2.234  -3.348  -2.087  -2.274 
 OH83P208  24933.6  -2.799  -3.196  -2.737  -3.818  -2.597  -2.771 
 OH83P210  25407.2  -3.410  -3.784  -3.349  -4.367  -3.221  -3.345 
 OH83P211  25679.8  -3.656  -4.019  -3.595  -4.584  -3.475  -3.581 
 OH83P215  26996.9  -5.777  -6.101  -5.707  -6.592  -5.615  -5.655 
 OH83Q101  23949.8   2.183   1.650   2.268   0.848   2.464   2.132 
 OH83Q102  24009.6   1.691   1.158   1.778   0.357   1.972   1.642 
 OH83Q103  24093.5   0.952   0.418   1.039  -0.385   1.221   0.895 
 OH83Q104  24201.7   0.007  -0.528   0.094  -1.330   0.260  -0.058 
 OH83Q105  24334.2  -1.200  -1.735  -1.113  -2.529  -0.939  -1.262 
 OH83Q201  24080.4   1.306   0.774   1.390  -0.027   1.588   1.257 
 OH83Q202  24122.0   0.791   0.260   0.872  -0.538   1.085   0.738 
 OH83Q203  24191.1   0.044  -0.486   0.122  -1.278   0.331  -0.025 
 OH83Q205  24410.1  -1.957  -2.482  -1.882  -3.266  -1.624  -2.029 
 OH83R103  24093.5   1.194   0.591   1.289  -0.287   1.489   1.092 
 OH83R104  24201.7   0.415  -0.211   0.515  -1.113   0.723   0.291 
 OH83R105  24334.2  -0.468  -1.121  -0.364  -2.046  -0.144  -0.615 
 OH83R107  24672.4  -2.100  -2.812  -1.985  -3.785  -1.752  -2.299 
 OH83R108  24877.8  -2.629  -3.373  -2.507  -4.372  -2.270  -2.860 
 OH83R111  25635.7  -3.537  -4.397  -3.385  -5.470  -3.142  -3.835 
 OH83R112  25934.4  -3.948  -4.853  -3.782  -5.952  -3.541  -4.276 
 OH83R113  26255.4  -4.226  -5.181  -4.043  -6.304  -3.801  -4.596 
 OH83R114  26598.2  -4.963  -5.971  -4.758  -7.118  -4.511  -5.369 
 OH83R202  24122.0   0.976   0.410   1.066  -0.427   1.300   0.903 
 OH83R204  24287.3  -0.203  -0.819  -0.105  -1.710   0.139  -0.319 
 OH83R205  24410.1  -0.980  -1.623  -0.876  -2.539  -0.637  -1.121 
 OH83R207  24733.7  -2.349  -3.053  -2.234  -4.023  -1.990  -2.545 
 OH83R208  24933.6  -2.851  -3.589  -2.730  -4.587  -2.478  -3.075 
 OH83R209  25158.3  -3.004  -3.778  -2.875  -4.802  -2.618  -3.262 
 OH83R210  25407.2  -3.656  -4.469  -3.517  -5.520  -3.265  -3.911 
 OH83R214  26634.9  -5.187  -6.192  -4.985  -7.349  -4.744  -5.591 
 OH84P101  23949.8   2.318   1.905   2.431   1.327   2.468   2.134 
 OH84P102  24009.6   1.854   1.450   1.965   0.886   1.998   1.681 
 OH84P103  24093.5   1.242   0.847   1.351   0.297   1.382   1.079 
 OH84P104  24201.7   0.507   0.122   0.615  -0.414   0.643   0.354 
 OH84P105  24334.2  -0.490  -0.867  -0.384  -1.389  -0.358  -0.634 
 OH84P106  24491.2  -1.244  -1.613  -1.139  -2.121  -1.116  -1.381 
 OH84P107  24672.4  -1.976  -2.337  -1.872  -2.831  -1.851  -2.106 
 OH84P108  24877.8  -2.551  -2.905  -2.449  -3.385  -2.430  -2.676 
 OH84P201  24080.4   1.377   0.957   1.492   0.367   1.499   1.184 
 OH84P202  24122.0   1.091   0.681   1.203   0.107   1.213   0.911 
 OH84P203  24191.1   0.550   0.151   0.660  -0.408   0.672   0.382 
 OH84P204  24287.3  -0.096  -0.484   0.013  -1.028   0.026  -0.252 
 OH84P207  24733.7  -2.278  -2.640  -2.174  -3.139  -2.160  -2.410 
 OH84P208  24933.6  -2.696  -3.051  -2.593  -3.534  -2.580  -2.822 
 OH84P209  25158.3  -3.165  -3.512  -3.064  -3.981  -3.052  -3.287 
 OH84P212  25975.7  -3.806  -4.134  -3.708  -4.559  -3.700  -3.925 
 OH84Q101  23949.8   2.281   1.841   2.399   1.229   2.421   2.062 
 OH84Q102  24009.6   1.832   1.392   1.951   0.779   1.970   1.611 
 OH84Q103  24093.5   1.108   0.668   1.228   0.056   1.242   0.883 
 OH84Q201  24080.4   1.322   0.883   1.439   0.271   1.463   1.104 
 OH84Q202  24122.0   0.994   0.556   1.108  -0.055   1.135   0.775 
 OH84Q203  24191.1   0.339  -0.098   0.450  -0.707   0.482   0.117 
 OH84Q204  24287.3  -0.350  -0.784  -0.241  -1.391  -0.209  -0.574 
 OH84R103  24093.5   1.259   0.777   1.383   0.113   1.394   0.981 
 OH84R104  24201.7   0.509   0.014   0.637  -0.666   0.648   0.210 
 OH84R105  24334.2  -0.352  -0.863  -0.221  -1.557  -0.209  -0.675 
 OH84R108  24877.8  -2.491  -3.053  -2.350  -3.794  -2.342  -2.900 
 OH84R109  25107.0  -2.913  -3.495  -2.769  -4.251  -2.762  -3.362 
 OH84R114  26598.2  -5.018  -5.723  -4.856  -6.554  -4.870  -5.716 
 OH84R202  24122.0   1.057   0.598   1.178  -0.039   1.222   0.811 
 OH84R206  24559.1  -1.651  -2.173  -1.518  -2.880  -1.489  -1.993 
 OH84R210  25407.2  -3.502  -4.102  -3.355  -4.878  -3.340  -3.987 
 OH84R211  25679.8  -3.773  -4.396  -3.622  -5.189  -3.611  -4.302 
 OH84R212  25975.7  -3.929  -4.577  -3.775  -5.386  -3.768  -4.507 
 OH93P101  26185.8   1.740   1.195   1.795   0.328  -9.999  -9.999 
 OH93P102  26242.2   1.329   0.803   1.379  -0.039  -9.999  -9.999 
 OH93P103  26321.3   0.762   0.255   0.808  -0.564  -9.999  -9.999 
 OH93P104  26423.3   0.068  -0.421   0.109  -1.219  -9.999  -9.999 
 OH93P105  26548.2  -0.779  -1.251  -0.742  -2.028  -9.999  -9.999 
 OH93P106  26695.9  -1.678  -2.134  -1.646  -2.890  -9.999  -9.999 
 OH93P107  26866.4  -2.494  -2.934  -2.467  -3.670  -9.999  -9.999 
 OH93P108  27059.4  -3.263  -3.689  -3.242  -4.403  -9.999  -9.999 
 OH93P201  26316.5   0.531  -0.030   0.588  -0.913  -9.999  -9.999 
 OH93P202  26355.6   0.466  -0.072   0.519  -0.929  -9.999  -9.999 
 OH93P203  26420.4   0.006  -0.510   0.054  -1.341  -9.999  -9.999 
 OH93P204  26510.6  -0.594  -1.089  -0.551  -1.894  -9.999  -9.999 
 OH93P205  26625.8  -1.336  -1.812  -1.298  -2.594  -9.999  -9.999 
 OH93P206  26765.6  -2.202  -2.661  -2.169  -3.419  -9.999  -9.999 
 OH93P208  27117.0  -3.645  -4.073  -3.624  -4.790  -9.999  -9.999 
 OH93Q101  26185.8   1.624   1.022   1.687   0.093  -9.999  -9.999 
 OH93Q102  26242.2   1.062   0.460   1.125  -0.467  -9.999  -9.999 
 OH93Q103  26321.3   0.337  -0.266   0.400  -1.193  -9.999  -9.999 
 OH93Q201  26316.5   0.643   0.043   0.705  -0.885  -9.999  -9.999 
 OH93Q202  26355.6   0.206  -0.393   0.265  -1.312  -9.999  -9.999 
 OH93R102  26242.2   1.414   0.749   1.484  -0.251  -9.999  -9.999 
 OH93R103  26321.3   0.643  -0.052   0.716  -1.078  -9.999  -9.999 
 OH93R104  26423.3  -0.070  -0.798   0.006  -1.857  -9.999  -9.999 
 OH93R106  26695.9  -1.870  -2.674  -1.790  -3.804  -9.999  -9.999 
 OH93R107  26866.4  -2.568  -3.417  -2.487  -4.581  -9.999  -9.999 
 OH93R108  27059.4  -3.645  -4.544  -3.563  -5.744  -9.999  -9.999 
 OH93R202  26355.6   0.410  -0.235   0.479  -1.207  -9.999  -9.999 
 OH93R203  26420.4  -0.111  -0.788  -0.039  -1.797  -9.999  -9.999 
 OH93R204  26510.6  -0.738  -1.451  -0.663  -2.498  -9.999  -9.999 
 OH93R206  26765.6  -2.399  -3.191  -2.319  -4.311  -9.999  -9.999 
 OH94P101  26185.8   1.787   1.313   1.907   0.630   2.034   1.831 
 OH94P102  26242.2   1.368   0.908   1.486   0.242   1.606   1.423 
 OH94P104  26423.3   0.101  -0.333   0.216  -0.964   0.325   0.179 
 OH94P106  26695.9  -1.675  -2.086  -1.562  -2.683  -1.466  -1.574 
 OH94P108  27059.4  -3.266  -3.659  -3.156  -4.220  -3.067  -3.144 
 OH94P110  27512.0  -4.880  -5.258  -4.770  -5.784  -4.687  -4.748 
 OH94P201  26316.5   0.809   0.325   0.932  -0.373   1.026   0.846 
 OH94P202  26355.6   0.530   0.063   0.651  -0.615   0.745   0.579 
 OH94P203  26420.4   0.061  -0.392   0.179  -1.050   0.271   0.123 
 OH94P204  26510.6  -0.561  -1.000  -0.446  -1.639  -0.354  -0.487 
 OH94P206  26765.6  -2.147  -2.561  -2.034  -3.162  -1.947  -2.050 
 OH94P207  26929.5  -2.681  -3.084  -2.569  -3.667  -2.485  -2.572 
 OH94P208  27117.0  -3.657  -4.051  -3.546  -4.614  -3.465  -3.537 
 OH94P209  27327.7  -4.419  -4.805  -4.309  -5.350  -4.230  -4.286 
 OH94Q101  26185.8   1.705   1.194   1.835   0.466   1.951   1.721 
 OH94Q102  26242.2   1.235   0.724   1.367  -0.004   1.478   1.252 
 OH94Q103  26321.3   0.574   0.062   0.707  -0.665   0.812   0.589 
 OH94Q105  26548.2  -1.379  -1.891  -1.242  -2.614  -1.154  -1.356 
 OH94Q201  26316.5   0.780   0.270   0.909  -0.457   1.026   0.797 
 OH94Q202  26355.6   0.354  -0.155   0.481  -0.880   0.602   0.376 
 OH94Q203  26420.4  -0.291  -0.798  -0.166  -1.521  -0.045  -0.268 
 OH94R103  26321.3   0.763   0.192   0.908  -0.603   1.017   0.734 
 OH94R104  26423.3   0.018  -0.572   0.169  -1.388   0.283  -0.023 
 OH94R105  26548.2  -0.838  -1.451  -0.680  -2.286  -0.567  -0.894 
 OH94R107  26866.4  -2.636  -3.298  -2.460  -4.173  -2.343  -2.725 
 OH94R108  27059.4  -3.380  -4.071  -3.195  -4.966  -3.079  -3.489 
 OH94R202  26355.6   0.491  -0.048   0.627  -0.807   0.772   0.485 
 OH94R203  26420.4   0.022  -0.538   0.164  -1.320   0.307   0.001 
 OH94R204  26510.6  -0.626  -1.207  -0.477  -2.012  -0.337  -0.661 
 OH94R207  26929.5  -2.841  -3.496  -2.667  -4.370  -2.532  -2.927 
 OH94R208  27117.0  -3.615  -4.300  -3.432  -5.195  -3.299  -3.720 
 OH95P102  26242.2   1.330   0.952   1.424   0.418   1.439   1.021 
 OH95P104  26423.3   0.071  -0.289   0.163  -0.797   0.171  -0.219 
 OH95P106  26695.9  -1.880  -2.221  -1.789  -2.704  -1.789  -2.156 
 OH95P201  26316.5   0.820   0.426   0.916  -0.132   0.905   0.489 
 OH95P204  26510.6  -0.609  -0.972  -0.517  -1.489  -0.524  -0.903 
 OH95P206  26765.6  -2.030  -2.373  -1.939  -2.863  -1.949  -2.309 
 OH95Q101  26185.8   1.740   1.329   1.838   0.751   1.841   1.381 
 OH95Q102  26242.2   1.307   0.897   1.406   0.318   1.406   0.945 
 OH95Q103  26321.3   0.700   0.291   0.800  -0.287   0.795   0.334 
 OH95Q104  26423.3  -0.118  -0.525  -0.018  -1.102  -0.028  -0.490 
 OH95Q201  26316.5   0.749   0.339   0.846  -0.239   0.852   0.391 
 OH95Q202  26355.6   0.515   0.107   0.609  -0.471   0.616   0.156 
 OH95Q203  26420.4  -0.044  -0.449   0.047  -1.026   0.058  -0.408 
 OH95R103  26321.3   0.754   0.309   0.855  -0.317   0.845   0.329 
 OH95R109  27274.8  -3.844  -4.352  -3.730  -5.065  -3.766  -4.452 
 OH95R202  26355.6   0.486   0.059   0.585  -0.542   0.608   0.097 
 OH95R206  26765.6  -2.003  -2.476  -1.897  -3.142  -1.897  -2.502 
 OH95R208  27117.0  -3.658  -4.153  -3.547  -4.853  -3.563  -4.228 
 OH95R209  27327.7  -3.707  -4.213  -3.594  -4.930  -3.619  -4.317 
 OH95R210  27561.0  -5.187  -5.704  -5.071  -6.437  -5.106  -5.833 
