# Supplementary material for: OH level populations and accuracies of Einstein- A coefficients from hundreds of measured lines
Source: Copernicus journal article supplement (doi:10.5194/acp-20-5269-2020), 2020-05-06
Supplement: Supplementary file 2 [file acp-20-5269-2020-supplement.zip › OHpop_Acoeff_figdata/OHpop_Acoeff_fig06.dat]

# Data for Fig. 6 in
# 'OH level populations and accuracies of Einstein-A coefficients
# from hundreds of measured lines'
# by Noll et al.
#
# Columns:
# (1) line ID of type 'OH'+v'+v''+branch+F'+N'
# (2) E'(v',N',F') - E'(v',1,1) in cm^(-1)
# Delta y for Q-P and R-P for Einstein-A coefficients from
# (3) B+16
# (4) HITRAN
# (5) vdLG08
# (6) TL89
# (7) LWR86
# (8) M74
# Remark: -9.999 for missing values
#
#       1       2       3       4       5       6       7       8
 OH30Q101     0.0  -0.079  -0.103  -0.075  -0.138  -0.087  -0.102 
 OH30Q102    74.9  -0.096  -0.129  -0.090  -0.178  -0.103  -0.130 
 OH30Q103   180.4  -0.087  -0.129  -0.080  -0.192  -0.090  -0.133 
 OH30Q104   316.9  -0.115  -0.166  -0.106  -0.242  -0.116  -0.164 
 OH30Q105   484.7  -0.209  -0.266  -0.198  -0.348  -0.211  -0.265 
 OH30Q201   128.1   0.005  -0.012   0.006  -0.035   0.029  -0.012 
 OH30Q202   181.9  -0.078  -0.105  -0.080  -0.140  -0.062  -0.101 
 OH30Q204   394.9  -0.271  -0.314  -0.277  -0.369  -0.274  -0.311 
 OH30R102    74.9  -0.016  -0.076  -0.012  -0.163  -0.030  -0.075 
 OH30R103   180.4  -0.013  -0.093  -0.007  -0.209  -0.009  -0.096 
 OH30R104   316.9   0.094  -0.008   0.103  -0.154   0.104  -0.010 
 OH30R106   683.8   0.158   0.012   0.172  -0.195   0.187   0.009 
 OH30R202   181.9   0.025  -0.022   0.030  -0.085   0.070  -0.023 
 OH30R204   394.9   0.082  -0.012   0.091  -0.143   0.129  -0.014 
 OH30R205   552.7   0.007  -0.111   0.018  -0.276   0.054  -0.116 
 OH40Q101     0.0   0.010  -0.033   0.008  -0.083  -0.012  -0.027 
 OH40Q102    71.9  -0.156  -0.216  -0.158  -0.290  -0.163  -0.209 
 OH40Q103   173.2  -0.303  -0.378  -0.305  -0.480  -0.302  -0.333 
 OH40Q104   304.2  -0.441  -0.531  -0.443  -0.656  -0.479  -0.540 
 OH40Q105   465.1  -0.650  -0.753  -0.652  -0.887  -0.609  -0.645 
 OH40Q201   128.7  -0.052  -0.083  -0.055  -0.113  -0.007  -0.083 
 OH40Q202   180.1  -0.162  -0.211  -0.170  -0.247  -0.198  -0.201 
 OH40Q203   265.3  -0.187  -0.252  -0.199  -0.327  -0.014  -0.121 
 OH40Q204   383.7  -0.574  -0.652  -0.588  -0.748  -0.171  -0.583 
 OH40R102    71.9  -0.063  -0.171  -0.072  -0.287  -0.055  -0.146 
 OH40R103   173.2  -0.097  -0.243  -0.109  -0.408  -0.069  -0.238 
 OH40R104   304.2  -0.062  -0.248  -0.077  -0.455  -0.038  -0.200 
 OH40R106   655.9  -0.137  -0.406  -0.158  -0.694  -0.057  -0.329 
 OH40R112  2421.5  -0.288  -0.858  -0.315  -1.417  -0.030  -0.284 
 OH40R113  2816.3  -0.027  -0.658  -0.050  -1.269   0.240   0.045 
 OH40R202   180.1   0.000  -0.085  -0.006  -0.178   0.075  -0.069 
 OH40R203   265.3  -0.023  -0.151  -0.033  -0.294   0.072  -0.130 
 OH40R204   383.7  -0.087  -0.258  -0.100  -0.440  -0.001  -0.220 
 OH40R207   931.9  -0.322  -0.627  -0.344  -0.952  -0.216  -0.555 
 OH40R210  1758.7  -0.248  -0.701  -0.276  -1.171  -0.056  -0.368 
 OH41Q102    71.9   0.127   0.098   0.133   0.052   0.119   0.083 
 OH41Q103   173.2  -0.302  -0.339  -0.294  -0.397  -0.309  -0.358 
 OH41Q201   128.7  -0.406  -0.420  -0.405  -0.442  -0.386   1.078 
 OH41Q202   180.1  -0.459  -0.483  -0.461  -0.517  -0.440   0.216 
 OH41Q203   265.3  -0.447  -0.478  -0.451  -0.526  -0.426  -0.046 
 OH41R102    71.9   0.216   0.164   0.222   0.084   0.200   0.138 
 OH41R103   173.2  -0.243  -0.314  -0.235  -0.422  -0.251  -0.350 
 OH41R202   180.1  -0.023  -0.065  -0.018  -0.123   0.015  -0.085 
 OH41R203   265.3  -0.060  -0.122  -0.052  -0.211  -0.024  -0.153 
 OH50Q101     0.0  -0.137  -0.208  -0.154  -0.274  -0.100  -0.217 
 OH50Q102    69.0  -0.299  -0.396  -0.321  -0.470  -0.105  -0.466 
 OH50Q201   129.3  -0.340  -0.391  -0.354  -0.416  -0.415  -0.447 
 OH50Q202   178.3  -0.273  -0.352  -0.297  -0.461  -0.563  -0.275 
 OH50R102    69.0  -0.119  -0.298  -0.167  -0.480   0.039  -0.409 
 OH50R103   166.1  -0.136  -0.380  -0.202  -0.614  -0.118  -0.455 
 OH50R104   291.5  -0.163  -0.475  -0.250  -0.784  -0.188  -0.589 
 OH50R202   178.3  -0.103  -0.244  -0.140  -0.376  -0.130  -0.284 
 OH51Q101     0.0  -0.052  -0.087  -0.047  -0.133  -0.057  -0.079 
 OH51Q105   445.5  -0.543  -0.628  -0.528  -0.743  -0.564  -0.612 
 OH51Q201   129.3  -0.038  -0.063  -0.036  -0.094  -0.013  -0.051 
 OH51Q202   178.3   0.186   0.146   0.186   0.095   0.223   0.148 
 OH51Q203   259.5   0.164   0.111   0.164   0.035   0.176   0.097 
 OH51Q205   516.5  -1.311  -1.386  -1.311  -1.461  -1.205  -1.327 
 OH51R102    69.0  -0.037  -0.125  -0.027  -0.237  -0.039  -0.089 
 OH51R103   166.1  -0.066  -0.185  -0.053  -0.334  -0.057  -0.150 
 OH51R105   445.5  -0.096  -0.280  -0.075  -0.509  -0.060  -0.226 
 OH51R106   628.0  -0.222  -0.440  -0.195  -0.705  -0.174  -0.377 
 OH51R113  2692.2  -0.156  -0.646  -0.073  -1.195   0.024  -0.545 
 OH51R202   178.3   0.016  -0.054   0.024  -0.138   0.076  -0.035 
 OH51R203   259.5  -0.023  -0.128  -0.011  -0.256   0.037  -0.095 
 OH51R206   691.1  -0.063  -0.273  -0.037  -0.530   0.013  -0.209 
 OH51R213  2727.5  -0.306  -0.793  -0.224  -1.347  -0.114  -0.697 
 OH51R214  3128.7  -0.248  -0.782  -0.150  -1.380  -0.048  -0.684 
 OH51R215  3555.7   0.060  -0.525   0.175  -1.165   0.307  -0.425 
 OH61Q101     0.0  -0.069  -0.132  -0.073  -0.188  -0.057  -0.099 
 OH61Q102    66.0  -0.203  -0.289  -0.207  -0.375  -0.167  -0.236 
 OH61Q103   158.8  -0.394  -0.503  -0.399  -0.616  -0.459  -0.367 
 OH61Q201   129.8  -0.050  -0.095  -0.055  -0.140  -0.007  -0.061 
 OH61Q202   176.4  -0.307  -0.378  -0.316  -0.430  -0.310  -0.395 
 OH61Q203   253.6  -0.624  -0.717  -0.638  -0.825  -0.660  -0.745 
 OH61R102    66.0  -0.039  -0.198  -0.053  -0.352  -0.029  -0.098 
 OH61R104   278.6  -0.116  -0.388  -0.139  -0.637  -0.142  -0.231 
 OH61R105   425.6  -0.104  -0.436  -0.133  -0.745  -0.085  -0.199 
 OH61R202   176.4  -0.016  -0.141  -0.025  -0.262   0.041  -0.044 
 OH61R203   253.6  -0.070  -0.256  -0.084  -0.432  -0.038  -0.123 
 OH61R205   498.2  -0.065  -0.379  -0.091  -0.672  -0.036  -0.144 
 OH61R208  1082.4  -0.312  -0.826  -0.360  -1.298  -0.236  -0.494 
 OH61R209  1333.2  -0.378  -0.964  -0.436  -1.485  -0.324  -0.525 
 OH62Q101     0.0  -0.064  -0.095  -0.056  -0.137  -0.067  -0.095 
 OH62Q102    66.0  -0.124  -0.168  -0.112  -0.227  -0.125  -0.167 
 OH62Q103   158.8  -0.202  -0.256  -0.186  -0.330  -0.193  -0.259 
 OH62Q104   278.6  -0.331  -0.397  -0.313  -0.486  -0.322  -0.398 
 OH62Q201   129.8  -0.026  -0.049  -0.022  -0.077  -0.000  -0.048 
 OH62Q202   176.4  -0.153  -0.189  -0.149  -0.232  -0.121  -0.188 
 OH62Q204   361.1  -0.536  -0.593  -0.532  -0.668  -0.508  -0.596 
 OH62Q205   498.2  -0.800  -0.867  -0.795  -0.962  -0.748  -0.865 
 OH62R102    66.0  -0.026  -0.104  -0.008  -0.206  -0.027  -0.101 
 OH62R103   158.8  -0.053  -0.158  -0.029  -0.296  -0.036  -0.157 
 OH62R104   278.6  -0.055  -0.188  -0.025  -0.362  -0.022  -0.187 
 OH62R109  1284.8  -0.092  -0.384  -0.024  -0.735   0.010  -0.391 
 OH62R111  1874.4  -0.107  -0.475  -0.021  -0.897   0.029  -0.493 
 OH62R113  2566.8  -0.159  -0.613  -0.052  -1.108   0.006  -0.649 
 OH62R114  2950.4  -0.036  -0.538   0.083  -1.068   0.153  -0.585 
 OH62R115  3358.3  -0.212  -0.767  -0.082  -9.999  -0.009  -0.827 
 OH62R202   176.4  -0.022  -0.084  -0.008  -0.160   0.038  -0.082 
 OH62R203   253.6  -0.042  -0.134  -0.021  -0.250   0.020  -0.131 
 OH62R204   361.1  -0.046  -0.168  -0.018  -0.324   0.022  -0.166 
 OH62R205   498.2  -0.078  -0.232  -0.043  -0.427  -0.001  -0.229 
 OH62R207   859.3  -0.328  -0.546  -0.278  -0.820  -0.236  -0.547 
 OH62R209  1333.2  -0.092  -0.378  -0.024  -0.729   0.026  -0.386 
 OH62R212  2246.6  -0.249  -0.654  -0.153  -1.116  -0.087  -0.680 
 OH62R213  2603.2  -0.143  -0.593  -0.037  -1.096   0.035  -0.629 
 OH62R215  3390.9  -0.213  -0.764  -0.083  -1.342   0.000  -0.822 
 OH72Q101     0.0  -0.094  -0.138  -0.085  -0.194  -0.091  -0.116 
 OH72Q103   151.3  -0.306  -0.382  -0.289  -0.484  -0.307  -0.329 
 OH72Q104   265.4  -0.571  -0.662  -0.551  -0.786  -0.570  -0.575 
 OH72Q105   405.4  -0.815  -0.919  -0.791  -1.049  -0.784  -0.861 
 OH72Q201   130.2  -0.052  -0.083  -0.047  -0.121  -0.796  -0.069 
 OH72R102    62.9  -0.149  -0.259  -0.130  -0.395  -0.140  -0.188 
 OH72R104   265.4  -0.108  -0.295  -0.073  -0.528  -0.055  -0.170 
 OH72R105   405.4  -0.155  -0.382  -0.111  -0.660  -0.092  -0.223 
 OH72R107   762.6  -0.223  -0.535  -0.157  -0.910  -0.116  -0.326 
 OH72R108   979.6  -0.207  -0.564  -0.128  -0.990  -0.059  -0.334 
 OH72R202   174.4  -0.048  -0.134  -0.033  -0.239   0.025  -0.068 
 OH72R203   247.6  -0.069  -0.197  -0.045  -0.354   0.020  -0.107 
 OH72R204   349.5  -0.127  -0.298  -0.095  -0.506  -0.041  -0.184 
 OH72R208  1033.9  -0.278  -0.627  -0.201  -1.046  -0.121  -0.406 
 OH72R212  2138.1  -0.360  -0.924  -0.211  -1.553  -0.026  -0.624 
 OH73Q101     0.0  -0.031  -0.061  -0.025  -0.099  -0.039  -0.065 
 OH73Q102    62.9  -0.064  -0.105  -0.055  -0.158  -0.068  -0.111 
 OH73Q103   151.3  -0.183  -0.234  -0.171  -0.302  -0.184  -0.242 
 OH73Q105   405.4  -0.394  -0.465  -0.378  -0.560  -0.397  -0.480 
 OH73Q106   571.1  -0.539  -0.619  -0.522  -0.725  -0.538  -0.637 
 OH73Q203   247.6  -0.224  -0.268  -0.223  -0.322  -0.205  -0.279 
 OH73Q205   479.6  -0.635  -0.697  -0.633  -0.776  -0.614  -0.713 
 OH73R102    62.9  -0.029  -0.103  -0.017  -0.197  -0.040  -0.113 
 OH73R103   151.3  -0.035  -0.135  -0.018  -0.260  -0.033  -0.148 
 OH73R105   405.4  -0.015  -0.168   0.011  -0.359   0.006  -0.191 
 OH73R106   571.1  -0.029  -0.210   0.002  -0.432  -0.000  -0.239 
 OH73R113  2438.5  -0.019  -0.427   0.063  -0.873   0.056  -0.518 
 OH73R114  2802.1   0.073  -0.374   0.165  -0.853   0.154  -0.480 
 OH73R202   174.4   0.035  -0.022   0.045  -0.091   0.084  -0.030 
 OH73R203   247.6   0.103   0.017   0.118  -0.088   0.153   0.005 
 OH73R209  1271.8  -0.079  -0.345  -0.031  -0.664  -0.013  -0.392 
 OH73R210  1535.5  -0.006  -0.305   0.049  -0.658   0.066  -0.362 
 OH73R212  2138.1  -0.093  -0.462  -0.022  -0.883  -0.014  -0.539 
 OH73R213  2476.0   0.143  -0.263   0.223  -0.718   0.229  -0.353 
 OH73R214  2837.6  -0.164  -0.608  -0.072  -1.097  -0.071  -0.713 
 OH82Q101     0.0  -0.144  -0.216  -0.148  -0.288  -9.999  -9.999 
 OH82Q102    59.7  -0.311  -0.408  -0.315  -0.509  -9.999  -9.999 
 OH82Q103   143.6  -0.536  -0.658  -0.541  -0.794  -9.999  -9.999 
 OH82Q201   130.6  -0.073  -0.125  -0.078  -0.179  -9.999  -9.999 
 OH82R102    59.7  -0.110  -0.291  -0.125  -0.463  -9.999  -9.999 
 OH82R103   143.6  -0.140  -0.383  -0.157  -0.607  -9.999  -9.999 
 OH82R104   251.8  -0.192  -0.499  -0.212  -0.786  -9.999  -9.999 
 OH82R106   541.4  -0.352  -0.788  -0.370  -1.215  -9.999  -9.999 
 OH82R202   172.2  -0.125  -0.267  -0.136  -0.408  -9.999  -9.999 
 OH82R203   241.3  -0.137  -0.348  -0.152  -0.548  -9.999  -9.999 
 OH82R204   337.5  -0.286  -0.567  -0.304  -0.834  -9.999  -9.999 
 OH83Q101     0.0  -0.084  -0.127  -0.076  -0.177  -0.084  -0.116 
 OH83Q102    59.7  -0.157  -0.215  -0.145  -0.284  -0.144  -0.194 
 OH83Q103   143.6  -0.285  -0.358  -0.270  -0.449  -0.275  -0.338 
 OH83Q104   251.8  -0.486  -0.575  -0.468  -0.683  -0.480  -0.556 
 OH83Q105   384.4  -0.828  -0.930  -0.807  -1.048  -0.804  -0.900 
 OH83Q201   130.6   0.010  -0.020   0.014  -0.053   0.043  -0.010 
 OH83Q202   172.2  -0.219  -0.266  -0.214  -0.320  -0.170  -0.254 
 OH83Q203   241.3  -0.493  -0.555  -0.488  -0.624  -0.443  -0.555 
 OH83Q205   460.3  -1.082  -1.171  -1.075  -1.273  -0.975  -1.163 
 OH83R103   143.6  -0.043  -0.186  -0.019  -0.351  -0.006  -0.141 
 OH83R104   251.8  -0.078  -0.258  -0.047  -0.466  -0.017  -0.207 
 OH83R105   384.4  -0.096  -0.316  -0.059  -0.565  -0.009  -0.254 
 OH83R108   927.9  -0.150  -0.498  -0.089  -0.877   0.000  -0.409 
 OH83R112  1984.6  -0.378  -0.931  -0.275  -1.482  -0.150  -0.792 
 OH83R114  2648.4   0.001  -0.674   0.139  -1.309   0.286  -0.513 
 OH83R202   172.2  -0.034  -0.116  -0.020  -0.208   0.045  -0.090 
 OH83R204   337.5  -0.085  -0.250  -0.057  -0.438   0.025  -0.202 
 OH83R205   460.3  -0.105  -0.311  -0.069  -0.546   0.012  -0.255 
 OH83R207   783.9  -0.051  -0.346  -0.001  -0.675   0.097  -0.270 
 OH83R208   983.8  -0.052  -0.392   0.007  -0.769   0.118  -0.303 
 OH83R210  1457.3  -0.246  -0.685  -0.168  -1.153  -0.045  -0.566 
 OH84Q101     0.0  -0.038  -0.063  -0.032  -0.098  -0.047  -0.072 
 OH84Q102    59.7  -0.022  -0.058  -0.013  -0.107  -0.028  -0.070 
 OH84Q103   143.6  -0.134  -0.179  -0.123  -0.241  -0.140  -0.196 
 OH84Q201   130.6  -0.055  -0.074  -0.053  -0.096  -0.035  -0.080 
 OH84Q202   172.2  -0.097  -0.125  -0.095  -0.162  -0.078  -0.136 
 OH84Q203   241.3  -0.211  -0.249  -0.210  -0.298  -0.190  -0.264 
 OH84Q204   337.5  -0.254  -0.300  -0.253  -0.363  -0.235  -0.322 
 OH84R103   143.6   0.017  -0.070   0.033  -0.185   0.012  -0.098 
 OH84R104   251.8   0.002  -0.108   0.022  -0.252   0.005  -0.144 
 OH84R105   384.4   0.138   0.004   0.163  -0.168   0.149  -0.040 
 OH84R108   927.9   0.061  -0.148   0.099  -0.409   0.088  -0.224 
 OH84R202   172.2  -0.034  -0.084  -0.025  -0.146   0.009  -0.100 
 OH84R212  2025.9  -0.123  -0.443  -0.067  -0.827  -0.069  -0.582 
 OH93Q101     0.0  -0.117  -0.173  -0.108  -0.236  -9.999  -9.999 
 OH93Q102    56.4  -0.267  -0.343  -0.254  -0.428  -9.999  -9.999 
 OH93Q103   135.5  -0.425  -0.521  -0.409  -0.629  -9.999  -9.999 
 OH93Q201   130.7   0.112   0.073   0.117   0.028  -9.999  -9.999 
 OH93Q202   169.8  -0.260  -0.322  -0.254  -0.384  -9.999  -9.999 
 OH93R102    56.4   0.085  -0.054   0.105  -0.212  -9.999  -9.999 
 OH93R103   135.5  -0.119  -0.307  -0.092  -0.514  -9.999  -9.999 
 OH93R104   237.5  -0.138  -0.376  -0.104  -0.638  -9.999  -9.999 
 OH93R106   510.1  -0.192  -0.541  -0.144  -0.914  -9.999  -9.999 
 OH93R107   680.6  -0.075  -0.483  -0.020  -0.911  -9.999  -9.999 
 OH93R108   873.6  -0.382  -0.856  -0.321  -1.341  -9.999  -9.999 
 OH93R202   169.8  -0.056  -0.163  -0.040  -0.279  -9.999  -9.999 
 OH93R203   234.6  -0.116  -0.278  -0.093  -0.456  -9.999  -9.999 
 OH93R204   324.8  -0.144  -0.361  -0.113  -0.604  -9.999  -9.999 
 OH93R206   579.8  -0.197  -0.530  -0.150  -0.892  -9.999  -9.999 
 OH94Q101     0.0  -0.082  -0.119  -0.073  -0.164  -0.083  -0.111 
 OH94Q102    56.4  -0.132  -0.184  -0.119  -0.246  -0.128  -0.171 
 OH94Q201   130.7  -0.028  -0.055  -0.023  -0.084  -0.000  -0.049 
 OH94Q202   169.8  -0.176  -0.218  -0.170  -0.265  -0.143  -0.203 
 OH94Q203   234.6  -0.352  -0.406  -0.344  -0.471  -0.316  -0.391 
 OH94R104   237.5  -0.083  -0.239  -0.047  -0.423  -0.042  -0.202 
 OH94R108   873.6  -0.114  -0.412  -0.040  -0.746  -0.012  -0.345 
 OH94R202   169.8  -0.039  -0.111  -0.023  -0.192   0.027  -0.094 
 OH94R203   234.6  -0.039  -0.146  -0.015  -0.270   0.035  -0.121 
 OH94R204   324.8  -0.065  -0.207  -0.032  -0.374   0.016  -0.174 
 OH94R207   743.7  -0.160  -0.412  -0.098  -0.703  -0.046  -0.355 
 OH94R208   931.2   0.041  -0.249   0.114  -0.581   0.166  -0.183 
 OH95Q102    56.4  -0.023  -0.054  -0.018  -0.100  -0.033  -0.076 
 OH95Q104   237.5  -0.189  -0.236  -0.181  -0.305  -0.199  -0.271 
 OH95Q201   130.7  -0.071  -0.087  -0.070  -0.107  -0.053  -0.097 
 OH95R206   579.8   0.027  -0.103   0.042  -0.280   0.052  -0.193 
