# Supplementary material for: OH level populations and accuracies of Einstein- A coefficients from hundreds of measured lines
Source: Copernicus journal article supplement (doi:10.5194/acp-20-5269-2020), 2020-05-06
Supplement: Supplementary file 2 [file acp-20-5269-2020-supplement.zip › OHpop_Acoeff_figdata/OHpop_Acoeff_fig07.dat]

# Data for Fig. 7 in
# 'OH level populations and accuracies of Einstein-A coefficients
# from hundreds of measured lines'
# by Noll et al.
#
# Columns:
# (1) set of Einstein-A coefficients
# Mean rotational temperature for N' = 2 and 3 lines of
# (2) P1 branch
# (3) R1 branch
# (4) combined P1 and R1 branch
#
#     1       2       3       4
   B+16  195.94  191.95  193.77 
 HITRAN  200.99  185.76  192.87 
 vdLG08  195.62  192.74  194.00 
   TL89  207.93  179.40  192.34 
  LWR86  194.95  193.29  193.93 
    M74  199.88  186.53  192.84 
