# Supplementary material for: OH level populations and accuracies of Einstein- A coefficients from hundreds of measured lines
Source: Copernicus journal article supplement (doi:10.5194/acp-20-5269-2020), 2020-05-06
Supplement: Supplementary file 2 [file acp-20-5269-2020-supplement.zip › OHpop_Acoeff_figdata/OHpop_Acoeff_fig08.dat]

# Data for Fig. 8 in
# 'OH level populations and accuracies of Einstein-A coefficients
# from hundreds of measured lines'
# by Noll et al.
#
# Columns:
# (1) line ID of type 'OH'+v'+v''+branch+F'+N'
# (2) wavelength in mum
# Delta y for different v'' for Einstein-A coefficients from
# (3) B+16
# (4) HITRAN
# (5) vdLG08
# (6) TL89
# (7) LWR86
# (8) M74
# Remark: -9.999 for missing values
#
#       1         2       3       4       5       6       7       8
 OH41P101  1.037572  -0.203  -0.008  -0.064   0.225  -0.298  -0.368 
 OH41P102  1.042122  -0.389  -0.202  -0.252   0.026  -0.477  -0.577 
 OH41P103  1.047183   0.030   0.210   0.165   0.427  -0.038  -0.174 
 OH41P201  1.035013  -0.080   0.120   0.061   0.357  -0.154  -0.239 
 OH41P202  1.039939  -0.165   0.026  -0.027   0.252  -0.247  -0.335 
 OH41P203  1.045337  -0.055   0.128   0.081   0.350  -0.132  -0.244 
 OH41Q102  1.029884  -0.106   0.111   0.039   0.367  -0.195  -0.284 
 OH41Q103  1.031234   0.032   0.249   0.176   0.510  -0.045  -0.199 
 OH41Q104  1.033013  -0.013   0.205   0.131   0.472  -0.054  -0.193 
 OH41Q201  1.028759  -0.434  -0.217  -0.289   0.029  -0.532   0.922 
 OH41Q202  1.029534  -0.462  -0.246  -0.317  -0.017  -0.490   0.083 
 OH41Q203  1.030808  -0.314  -0.099  -0.171   0.150  -0.544  -0.169 
 OH41R102  1.021385  -0.110   0.133   0.042   0.396  -0.222  -0.293 
 OH41R103  1.019250  -0.116   0.139   0.039   0.412  -0.220  -0.285 
 OH41R106  1.015179  -0.002   0.297   0.161   0.595  -0.151  -0.272 
 OH41R202  1.023346  -0.189   0.046  -0.039   0.308  -0.307  -0.351 
 OH41R203  1.020584  -0.091   0.157   0.062   0.433  -0.228  -0.267 
 OH41R204  1.018383  -0.103   0.159   0.053   0.437  -0.246  -0.306 
 OH41R205  1.016716  -0.137   0.141   0.022   0.430  -0.299  -0.361 
 OH50P101  0.620444   0.067  -0.175  -0.230  -0.382  -0.269  -1.544 
 OH50P102  0.622349   0.096  -0.136  -0.197  -0.334  -0.191  -1.434 
 OH50P103  0.624537   0.079  -0.145  -0.212  -0.363  -0.263  -1.448 
 OH50P104  0.627014   0.069  -0.148  -0.222  -0.342  -0.206  -1.405 
 OH50P105  0.629785  -0.043  -0.256  -0.336  -0.439  -0.266  -1.476 
 OH50P106  0.632854  -0.116  -0.326  -0.411  -0.501  -0.298  -1.473 
 OH50P113  0.663190   0.150  -0.069  -0.187  -0.238  -0.017  -0.530 
 OH50P201  0.619465   0.000  -0.250  -0.302  -0.467  -0.336  -1.601 
 OH50P202  0.621478   0.083  -0.154  -0.213  -0.371  -0.161  -1.469 
 OH50P204  0.626349   0.078  -0.142  -0.214  -0.346  -0.132  -1.383 
 OH50P216  0.681206   0.346   0.121  -0.005  -9.999   0.337   0.253 
 OH50Q101  0.617235  -0.018  -0.295  -0.337  -0.523  -0.311  -1.683 
 OH50Q201  0.617123  -0.301  -0.578  -0.620  -0.788  -0.739  -1.997 
 OH50Q202  0.617590  -0.375  -0.653  -0.696  -0.927  -0.947  -1.892 
 OH50R102  0.614618   0.014  -0.309  -0.337  -0.577  -0.113  -1.754 
 OH50R103  0.614116   0.009  -0.339  -0.362  -0.642  -0.324  -1.752 
 OH50R202  0.615263  -0.036  -0.345  -0.376  -0.609  -0.367  -1.718 
 OH50R203  0.614507  -0.085  -0.421  -0.446  -0.683  -0.325  -1.854 
 OH61P101  0.653485   0.059  -0.189  -0.162  -0.402  -0.156   0.189 
 OH61P102  0.655543   0.062  -0.173  -0.155  -0.375  -0.147   0.209 
 OH61P103  0.657910   0.092  -0.131  -0.123  -0.327  -0.111   0.223 
 OH61P104  0.660596   0.080  -0.130  -0.133  -0.323  -0.112   0.236 
 OH61P105  0.663606   0.072  -0.125  -0.140  -0.307  -0.123   0.240 
 OH61P106  0.666947   0.063  -0.121  -0.148  -0.298  -0.137   0.239 
 OH61P109  0.679015   0.141  -0.001  -0.066  -0.166  -0.060   0.359 
 OH61P111  0.688849   0.070  -0.040  -0.131  -0.202  -0.126   0.348 
 OH61P119  0.744761  -0.285  -0.237  -0.407  -9.999  -9.999  -9.999 
 OH61P201  0.652423   0.042  -0.214  -0.181  -0.430  -0.159   0.176 
 OH61P202  0.654583   0.065  -0.178  -0.155  -0.381  -0.155   0.199 
 OH61P203  0.657059   0.082  -0.145  -0.134  -0.342  -0.128   0.214 
 OH61P204  0.659847   0.051  -0.162  -0.163  -0.352  -0.160   0.199 
 OH61P205  0.662945   0.017  -0.183  -0.195  -0.370  -0.189   0.159 
 OH61P207  0.670100   0.060  -0.112  -0.150  -0.287  -0.151   0.257 
 OH61P208  0.674172   0.223   0.065   0.014  -0.102   0.024   0.419 
 OH61P209  0.678587   0.041  -0.102  -0.166  -0.270  -0.147   0.266 
 OH61P212  0.693997  -0.069  -0.163  -0.267  -0.315  -0.247   0.215 
 OH61P215  0.712942  -0.063  -0.099  -0.238  -0.245  -0.224   0.301 
 OH61Q101  0.650052   0.054  -0.226  -0.179  -0.453  -0.146   0.185 
 OH61Q102  0.650679  -0.016  -0.294  -0.250  -0.523  -0.189   0.140 
 OH61Q103  0.651579  -0.101  -0.377  -0.336  -0.613  -0.376   0.115 
 OH61Q201  0.649932   0.019  -0.261  -0.213  -0.493  -0.166   0.163 
 OH61Q202  0.650446  -0.089  -0.367  -0.322  -0.579  -0.345  -0.008 
 OH61R102  0.647276   0.049  -0.268  -0.200  -0.521  -0.150   0.212 
 OH61R104  0.646531   0.020  -0.330  -0.247  -0.599  -0.231   0.191 
 OH61R110  0.651063  -0.027  -0.492  -0.376  -0.851  -0.310   0.364 
 OH61R202  0.647970   0.071  -0.235  -0.172  -0.483  -0.153   0.237 
 OH61R203  0.647193   0.055  -0.268  -0.197  -0.525  -0.186   0.222 
 OH61R205  0.646668   0.030  -0.330  -0.244  -0.615  -0.224   0.244 
 OH61R209  0.649479  -0.246  -0.687  -0.577  -1.026  -0.497   0.128 
 OH72P101  0.690274  -0.096  -0.116  -0.115  -0.311  -0.071   0.310 
 OH72P102  0.692513  -0.007  -0.022  -0.027  -0.211   0.017   0.388 
 OH72P103  0.695096  -0.119  -0.128  -0.138  -0.313  -0.087   0.261 
 OH72P104  0.698034  -0.104  -0.106  -0.122  -0.285  -0.074   0.272 
 OH72P105  0.701335  -0.068  -0.065  -0.085  -0.239  -0.033   0.293 
 OH72P107  0.709055  -0.051  -0.037  -0.065  -0.202  -0.005   0.289 
 OH72P113  0.741901   0.011   0.044  -0.004  -0.100   0.102   0.256 
 OH72P115  0.756465  -0.053  -0.021  -0.074  -9.999   0.056   0.156 
 OH72P202  0.691453  -0.127  -0.145  -0.147  -0.337  -0.104   0.272 
 OH72P203  0.694144  -0.125  -0.136  -0.144  -0.321  -0.103   0.259 
 OH72P204  0.697185  -0.112  -0.117  -0.131  -0.297  -0.082   0.266 
 OH72P205  0.700579  -0.130  -0.128  -0.147  -0.302  -0.099   0.234 
 OH72P208  0.712941  -0.169  -0.151  -0.183  -0.310  -0.120   0.162 
 OH72P209  0.717824  -0.155  -0.133  -0.168  -0.287  -0.097   0.158 
 OH72P210  0.723108  -0.080  -0.053  -0.092  -0.204  -0.013   0.216 
 OH72P212  0.734941  -0.101  -0.070  -0.115  -0.215  -0.018   0.163 
 OH72P213  0.741525   0.136   0.168   0.121   0.028   0.227   0.379 
 OH72P214  0.748580  -0.016   0.017  -0.033  -0.122   0.082   0.213 
 OH72Q101  0.686585  -0.158  -0.193  -0.175  -0.405  -0.123   0.260 
 OH72Q103  0.688298  -0.242  -0.275  -0.256  -0.495  -0.210   0.174 
 OH72Q105  0.691283  -0.489  -0.519  -0.499  -0.728  -0.420  -0.088 
 OH72Q201  0.686458  -0.173  -0.207  -0.190  -0.539  -0.914   0.244 
 OH72R102  0.683632  -0.127  -0.177  -0.140  -0.409  -0.083   0.314 
 OH72R105  0.683036  -0.208  -0.279  -0.207  -0.540  -0.131   0.262 
 OH72R114  0.699152  -0.234  -0.460  -0.142  -0.846   0.241   0.164 
 OH72R202  0.684383  -0.211  -0.257  -0.225  -0.485  -0.163   0.234 
 OH72R203  0.683590  -0.297  -0.350  -0.308  -0.587  -0.236   0.147 
 OH72R212  0.692912  -0.367  -0.532  -0.303  -0.884  -0.031   0.078 
 OH82P101  0.591694   0.044  -0.130  -0.127  -0.303  -9.999  -9.999 
 OH82P102  0.593451   0.029  -0.130  -0.135  -0.297  -9.999  -9.999 
 OH82P103  0.595507   0.041  -0.101  -0.113  -0.266  -9.999  -9.999 
 OH82P104  0.597873   0.031  -0.094  -0.113  -0.252  -9.999  -9.999 
 OH82P105  0.600558   0.043  -0.065  -0.091  -0.212  -9.999  -9.999 
 OH82P106  0.603567  -0.011  -0.101  -0.134  -0.243  -9.999  -9.999 
 OH82P114  0.640526   0.093   0.140   0.059   0.003  -9.999  -9.999 
 OH82P201  0.590834   0.029  -0.152  -0.145  -0.328  -9.999  -9.999 
 OH82P202  0.592637   0.054  -0.111  -0.112  -0.277  -9.999  -9.999 
 OH82P203  0.594758   0.016  -0.132  -0.142  -0.293  -9.999  -9.999 
 OH82P204  0.597193   0.053  -0.077  -0.094  -0.234  -9.999  -9.999 
 OH82P205  0.599943  -0.069  -0.181  -0.206  -0.334  -9.999  -9.999 
 OH82P206  0.603010   0.026  -0.067  -0.098  -0.212  -9.999  -9.999 
 OH82P207  0.606404   0.100   0.026  -0.013  -0.119  -9.999  -9.999 
 OH82Q101  0.588981  -0.015  -0.218  -0.199  -0.413  -9.999  -9.999 
 OH82Q102  0.589610  -0.125  -0.323  -0.305  -0.522  -9.999  -9.999 
 OH82Q103  0.590511  -0.210  -0.401  -0.384  -0.611  -9.999  -9.999 
 OH82Q201  0.588876  -0.053  -0.257  -0.237  -0.453  -9.999  -9.999 
 OH82R103  0.586708  -0.055  -0.299  -0.251  -0.522  -9.999  -9.999 
 OH82R104  0.586762  -0.083  -0.335  -0.278  -0.573  -9.999  -9.999 
 OH82R202  0.587436  -0.037  -0.262  -0.228  -0.477  -9.999  -9.999 
 OH82R204  0.586888  -0.147  -0.394  -0.341  -0.630  -9.999  -9.999 
 OH84P101  0.944224   0.051   0.128   0.086   0.301  -0.080  -0.114 
 OH84P102  0.947946   0.005   0.077   0.042   0.245  -0.118  -0.154 
 OH84P103  0.952197   0.004   0.071   0.042   0.233  -0.114  -0.154 
 OH84P104  0.956997   0.014   0.075   0.053   0.233  -0.097  -0.144 
 OH84P105  0.962361  -0.118  -0.062  -0.079   0.092  -0.223  -0.273 
 OH84P106  0.968304  -0.006   0.045   0.033   0.193  -0.105  -0.160 
 OH84P108  0.981995  -0.072  -0.030  -0.031   0.110  -0.160  -0.226 
 OH84P201  0.942232   0.082   0.163   0.116   0.341  -0.046  -0.083 
 OH84P202  0.946113   0.081   0.155   0.117   0.326  -0.042  -0.082 
 OH84P203  0.950542   0.013   0.082   0.050   0.246  -0.103  -0.147 
 OH84P204  0.955515   0.022   0.085   0.060   0.243  -0.088  -0.136 
 OH84P207  0.973769   0.020   0.067   0.060   0.209  -0.073  -0.136 
 OH84P208  0.981018   0.103   0.146   0.144   0.283   0.017  -0.051 
 OH84Q101  0.937853   0.098   0.191   0.131   0.380  -0.043  -0.070 
 OH84Q102  0.938928   0.140   0.234   0.174   0.423  -0.002  -0.031 
 OH84Q103  0.940466   0.156   0.250   0.189   0.441   0.022  -0.012 
 OH84Q201  0.937689   0.016   0.110   0.049   0.298  -0.125  -0.153 
 OH84Q202  0.938549   0.203   0.296   0.236   0.483   0.051   0.036 
 OH84Q203  0.939967   0.295   0.388   0.328   0.572   0.151   0.143 
 OH84R103  0.931590   0.065   0.186   0.094   0.400  -0.096  -0.112 
 OH84R104  0.930993   0.094   0.225   0.122   0.447  -0.075  -0.081 
 OH84R105  0.930855   0.117   0.258   0.143   0.489  -0.065  -0.060 
 OH84R108  0.933366   0.138   0.320   0.157   0.578  -0.072  -0.041 
 OH84R114  0.952857  -0.055   0.248  -0.098   0.565  -0.359  -0.348 
 OH84R202  0.934042   0.081   0.188   0.112   0.388  -0.078  -0.092 
 OH84R210  0.937469   0.154   0.367   0.162   0.643  -0.075  -0.076 
 OH93P101  0.628917  -0.046  -0.118  -0.113  -0.302  -9.999  -9.999 
 OH93P102  0.630867  -0.039  -0.105  -0.107  -0.281  -9.999  -9.999 
 OH93P104  0.635806  -0.033  -0.088  -0.106  -0.255  -9.999  -9.999 
 OH93P106  0.642208  -0.003  -0.048  -0.084  -0.207  -9.999  -9.999 
 OH93P108  0.650156   0.004  -0.030  -0.086  -0.183  -9.999  -9.999 
 OH93P201  0.627983  -0.278  -0.355  -0.344  -0.540  -9.999  -9.999 
 OH93P202  0.629964  -0.065  -0.134  -0.132  -0.313  -9.999  -9.999 
 OH93P203  0.632315  -0.055  -0.118  -0.125  -0.291  -9.999  -9.999 
 OH93P204  0.635029  -0.033  -0.089  -0.105  -0.256  -9.999  -9.999 
 OH93P206  0.641558  -0.055  -0.101  -0.135  -0.258  -9.999  -9.999 
 OH93P208  0.649607   0.012  -0.022  -0.078  -0.175  -9.999  -9.999 
 OH93Q101  0.625969  -0.081  -0.172  -0.148  -0.374  -9.999  -9.999 
 OH93Q102  0.626695  -0.173  -0.264  -0.242  -0.464  -9.999  -9.999 
 OH93Q103  0.627733  -0.237  -0.328  -0.308  -0.527  -9.999  -9.999 
 OH93Q201  0.625867  -0.138  -0.228  -0.204  -0.428  -9.999  -9.999 
 OH93Q202  0.626447  -0.148  -0.239  -0.216  -0.432  -9.999  -9.999 
 OH93R103  0.623602  -0.120  -0.245  -0.192  -0.475  -9.999  -9.999 
 OH93R104  0.623739  -0.088  -0.225  -0.164  -0.469  -9.999  -9.999 
 OH93R107  0.626092   0.068  -0.119  -0.027  -0.408  -9.999  -9.999 
 OH93R108  0.627558  -0.265  -0.473  -0.368  -0.778  -9.999  -9.999 
 OH93R202  0.624341  -0.081  -0.187  -0.149  -0.400  -9.999  -9.999 
 OH93R203  0.623914  -0.133  -0.250  -0.203  -0.478  -9.999  -9.999 
 OH93R204  0.623872  -0.112  -0.243  -0.186  -0.486  -9.999  -9.999 
 OH95P102  1.012678  -0.038   0.044  -0.062   0.176  -0.167  -0.402 
 OH95P104  1.022859  -0.030   0.044  -0.053   0.167  -0.154  -0.398 
 OH95P106  1.035684  -0.205  -0.134  -0.226  -0.022  -0.324  -0.582 
 OH95P201  1.006347   0.011   0.101  -0.017   0.241  -0.121  -0.357 
 OH95P204  1.021158  -0.048   0.028  -0.071   0.150  -0.171  -0.416 
 OH95P206  1.034287   0.117   0.188   0.095   0.299  -0.002  -0.259 
 OH95Q101  1.001555   0.035   0.135   0.003   0.284  -0.110  -0.340 
 OH95Q102  1.002820   0.072   0.173   0.039   0.322  -0.072  -0.307 
 OH95Q103  1.004627   0.126   0.229   0.093   0.379  -0.017  -0.255 
 OH95Q201  1.001408  -0.031   0.069  -0.063   0.218  -0.174  -0.406 
 OH95Q202  1.002408   0.161   0.262   0.129   0.410   0.014  -0.220 
 OH95Q203  1.004061   0.247   0.348   0.213   0.495   0.103  -0.139 
 OH95R103  0.994924  -0.009   0.117  -0.052   0.285  -0.171  -0.405 
 OH95R202  0.997508  -0.005   0.106  -0.042   0.266  -0.164  -0.388 
 OH95R208  0.998014  -0.043   0.147  -0.115   0.342  -0.264  -0.508 
