# Supplementary material for: OH level populations and accuracies of Einstein- A coefficients from hundreds of measured lines
Source: Copernicus journal article supplement (doi:10.5194/acp-20-5269-2020), 2020-05-06
Supplement: Supplementary file 2 [file acp-20-5269-2020-supplement.zip › OHpop_Acoeff_figdata/OHpop_Acoeff_fig09.dat]

# Data for Fig. 9 in
# 'OH level populations and accuracies of Einstein-A coefficients
# from hundreds of measured lines'
# by Noll et al.
#
# Columns:
# (1) line ID of type 'OH'+v'+v''+branch+F'+N'
# (2) E'(p'=f) - E'(p'=e) in cm^(-1)
# (3) Delta y for Lambda doublet parities p' = f and e
#     and B+16 Einstein-A coefficients
#
#       1       2       3
 OH30P104    0.64  -0.013 
 OH30P105    1.01   0.025 
 OH30P106    1.45  -0.321 
 OH30P107    1.96  -0.276 
 OH30Q103    0.36   0.022 
 OH30Q104    0.64  -0.058 
 OH30Q105    1.01   0.130 
 OH40P104    0.59  -0.037 
 OH40P105    0.94  -0.151 
 OH40P106    1.35  -0.099 
 OH40P112    5.05  -0.440 
 OH40P113    5.82  -0.357 
 OH40P124   15.62  -0.515 
 OH40P207   -0.45   0.200 
 OH40P210   -1.68   0.461 
 OH40P213   -3.38   0.600 
 OH40P214   -4.03   0.583 
 OH40P220   -8.50   0.773 
 OH40P221   -9.30   0.856 
 OH40P222  -10.10   0.709 
 OH40Q103    0.33   0.039 
 OH40Q104    0.59   0.083 
 OH40Q105    0.94   0.134 
 OH41Q103    0.33  -0.013 
 OH41Q104    0.59  -0.121 
 OH41Q202    0.22   0.036 
 OH41Q203    0.24  -0.267 
 OH50P105    0.86   0.285 
 OH50P106    1.24   0.196 
 OH50P109    2.75  -0.470 
 OH50P113    5.41  -0.271 
 OH50P116    7.75  -0.224 
 OH50P209   -1.12  -0.214 
 OH50P216   -5.05   0.621 
 OH51P104    0.54  -0.027 
 OH51P105    0.86  -0.033 
 OH51P106    1.24  -0.320 
 OH51P107    1.69  -0.104 
 OH51P108    2.19  -0.230 
 OH51P111    4.00  -0.338 
 OH51P113    5.41  -0.359 
 OH51P115    6.95  -0.469 
 OH51P119   10.25  -0.544 
 OH51P120   11.10  -0.459 
 OH51P208   -0.73   0.199 
 OH51P212   -2.57   0.417 
 OH51P213   -3.14   0.367 
 OH51P214   -3.74   0.590 
 OH51P215   -4.38   0.365 
 OH51P216   -5.05   0.456 
 OH51P217   -5.73   0.465 
 OH51Q105    0.86   0.115 
 OH51R113    5.41   0.049 
 OH51R116    7.75   0.392 
 OH61P105    0.78  -0.073 
 OH61P106    1.14  -0.119 
 OH61P107    1.55  -0.279 
 OH61P109    2.53  -0.225 
 OH61P111    3.68  -0.295 
 OH61P112    4.31  -0.452 
 OH61P117    7.86  -0.234 
 OH61P119    9.38  -0.614 
 OH61P208   -0.66  -0.083 
 OH61P209   -1.02   0.403 
 OH61P210   -1.42   0.367 
 OH61P212   -2.36   0.193 
 OH61P215   -4.03   0.578 
 OH62P104    0.49  -0.039 
 OH62P105    0.78  -0.042 
 OH62P106    1.14  -0.092 
 OH62P108    2.01  -0.175 
 OH62P109    2.53  -0.260 
 OH62P111    3.68  -0.245 
 OH62P113    4.98  -0.310 
 OH62P114    5.67  -0.312 
 OH62P115    6.38  -0.509 
 OH62P116    7.11  -0.319 
 OH62P118    8.62  -0.499 
 OH62P119    9.38  -0.635 
 OH62P207   -0.36   0.425 
 OH62P208   -0.66   0.234 
 OH62P209   -1.02   0.276 
 OH62P212   -2.36   0.527 
 OH62P213   -2.88   0.348 
 OH62P214   -3.44   0.333 
 OH62P215   -4.03   0.423 
 OH62P218   -5.91   0.494 
 OH62Q103    0.27   0.020 
 OH62Q104    0.49   0.069 
 OH62R112    4.31  -0.171 
 OH62R113    4.98  -0.141 
 OH62R114    5.67  -0.304 
 OH62R115    6.38  -0.212 
 OH62R117    7.86  -0.254 
 OH62R215   -4.03   0.218 
 OH62R217   -5.27   0.041 
 OH72P105    0.71  -0.065 
 OH72P107    1.40  -0.045 
 OH72P108    1.83  -0.195 
 OH72P110    2.80  -0.310 
 OH72P111    3.35  -0.314 
 OH72P113    4.52  -0.324 
 OH72P115    5.79  -0.462 
 OH72P208   -0.60   0.142 
 OH72P209   -0.93   0.146 
 OH72P210   -1.30   0.273 
 OH72P212   -2.16   0.295 
 OH72P213   -2.63   0.292 
 OH72P214   -3.14   0.336 
 OH72P217   -4.79   0.475 
 OH72Q104    0.44   0.154 
 OH72Q105    0.71   0.300 
 OH72R114    5.15  -0.472 
 OH73P104    0.44  -0.021 
 OH73P105    0.71  -0.036 
 OH73P106    1.03  -0.095 
 OH73P107    1.40  -0.118 
 OH73P109    2.29  -0.157 
 OH73P113    4.52  -0.220 
 OH73P114    5.15  -0.200 
 OH73P115    5.79  -0.423 
 OH73P208   -0.60   0.247 
 OH73P209   -0.93   0.226 
 OH73P210   -1.30   0.235 
 OH73P212   -2.16   0.271 
 OH73P213   -2.63   0.390 
 OH73P214   -3.14   0.226 
 OH73Q103    0.24   0.025 
 OH73Q105    0.71   0.043 
 OH73Q106    1.03   0.232 
 OH73R113    4.52  -0.183 
 OH73R114    5.15   0.376 
 OH73R116    6.45  -0.423 
 OH73R217   -4.79   0.150 
 OH73R218   -5.37   0.000 
 OH82P105    0.62  -0.076 
 OH82P106    0.91  -0.168 
 OH82P107    1.25   0.056 
 OH82P110    2.50  -0.521 
 OH82P114    4.58   0.186 
 OH82P212   -1.95   0.068 
 OH82P213   -2.38  -0.262 
 OH83P105    0.62  -0.066 
 OH83P106    0.91  -0.075 
 OH83P108    1.62  -0.108 
 OH83P112    3.49  -0.262 
 OH83P114    4.58  -0.090 
 OH83P208   -0.54   0.125 
 OH83P210   -1.17   0.203 
 OH83P211   -1.54   0.194 
 OH83P215   -3.31   0.540 
 OH83Q104    0.39   0.107 
 OH83Q105    0.62  -0.020 
 OH83R111    2.98   0.019 
 OH83R112    3.49   0.120 
 OH83R113    4.03  -0.153 
 OH83R114    4.58   0.319 
 OH83R214   -2.83   0.127 
 OH84P104    0.39  -0.001 
 OH84P105    0.62  -0.126 
 OH84P106    0.91  -0.060 
 OH84P107    1.25  -0.040 
 OH84P108    1.62  -0.154 
 OH84P207   -0.30   0.072 
 OH84P208   -0.54  -0.201 
 OH84P209   -0.84   0.118 
 OH84P212   -1.95   0.023 
 OH84Q103    0.21   0.019 
 OH84R114    4.58  -0.331 
 OH93P105    0.54  -0.067 
 OH93P106    0.79  -0.028 
 OH93P107    1.08   0.038 
 OH93P108    1.41  -0.103 
 OH93P208   -0.50   0.145 
 OH94P104    0.33   0.044 
 OH94P106    0.79  -0.037 
 OH94P108    1.41  -0.004 
 OH94P110    2.17   0.045 
 OH94P208   -0.50   0.023 
 OH94P209   -0.76  -0.322 
 OH94Q105    0.54   0.096 
 OH95P104    0.33   0.009 
 OH95P106    0.79  -0.206 
 OH95Q103    0.18   0.023 
 OH95Q104    0.33  -0.087 
