# Supplementary material for: OH level populations and accuracies of Einstein- A coefficients from hundreds of measured lines
Source: Copernicus journal article supplement (doi:10.5194/acp-20-5269-2020), 2020-05-06
Supplement: Supplementary file 2 [file acp-20-5269-2020-supplement.zip › OHpop_Acoeff_figdata/OHpop_Acoeff_fig10.dat]

# Data for Fig. 10 in
# 'OH level populations and accuracies of Einstein-A coefficients
# from hundreds of measured lines'
# by Noll et al.
#
# Columns:
# (1) v'
# (2) v''
# (3) wavelength of Q1(1) in mum
# Regression analysis of Delta y versus N' for Q-P and R-P
# for B+16 Einstein-A coefficients:
# (4) number of selected lines for R-P
# (5) slope for R-P (no value: -9.999)
# (6) error of slope for R-P (no value: 9.999)
# (7) weighted wavelength-dependent linear fit of slope for R-P
# (8) N' = 0 intercept for R-P (no value: -9.999)
# (9) error of intercept for R-P (no value: 9.999)
# (10) weighted wavelength-dependent linear fit of intercept for R-P
# (11) number of selected lines for Q-P
# (12) slope for Q-P (no value: 9.999)
# (13) error of slope for Q-P (no value: -9.999)
# (14) weighted wavelength-dependent linear fit of slope for Q-P
# (15) N' = 0 intercept for Q-P (no value: 9.999)
# (16) error of intercept for Q-P (no value: -9.999)
# (17) weighted wavelength-dependent linear fit of intercept for Q-P
# Band-specific deviations in y for different v'' (see Sect. 4.3):
# (18) number of selected lines for derivation of deviation
# (19) Delta y of deviation (no value: 0.000)
# (20) error in Delta y (no value: 0.000)
#
#1  2      3   4       5      6       7       8      9      10  11      12     13      14      15     16      17  18      19     20
 8  2  0.589   5  -0.035  0.007  -0.043  -0.043  0.021  -0.014   4  -0.213  0.022  -0.218   0.107  0.042   0.154  13  -0.005  0.007 
 5  0  0.617   4  -9.999  9.999  -0.039  -9.999  9.999  -0.013   2  -9.999  9.999  -0.206  -9.999  9.999   0.144  12   0.022  0.010 
 9  3  0.626   5  -0.049  0.023  -0.038   0.076  0.082  -0.012   5  -0.218  0.059  -0.202   0.202  0.114   0.141  11  -0.083  0.007 
 6  1  0.650   7  -0.042  0.009  -0.034   0.072  0.040  -0.012   6  -0.225  0.046  -0.191   0.175  0.098   0.132  14   0.048  0.008 
 7  2  0.687   9  -0.027  0.006  -0.029  -0.022  0.030  -0.010   5  -0.178  0.020  -0.175   0.131  0.063   0.119  10  -0.168  0.012 
 8  3  0.728  10  -0.028  0.007  -0.024   0.054  0.046  -0.009   6  -0.143  0.017  -0.156   0.107  0.042   0.104   0   0.000  0.000 
 4  0  0.753   9  -0.030  0.007  -0.020   0.024  0.039  -0.008   7  -0.130  0.018  -0.145   0.112  0.045   0.095   0   0.000  0.000 
 9  4  0.775   6  -0.018  0.005  -0.017  -0.001  0.024  -0.007   5  -0.141  0.025  -0.135   0.100  0.048   0.087   0   0.000  0.000 
 5  1  0.792   9  -0.000  0.007  -0.015  -0.064  0.052  -0.006   3  -0.124  0.011  -0.128   0.079  0.028   0.081   0   0.000  0.000 
 6  2  0.835  16  -0.013  0.004  -0.009  -0.017  0.034  -0.005   8  -0.166  0.028  -0.109   0.176  0.085   0.066   0   0.000  0.000 
 7  3  0.883  12   0.001  0.005  -0.003  -0.007  0.043  -0.003   7  -0.120  0.021  -0.087   0.133  0.081   0.048   0   0.000  0.000 
 8  4  0.938   6  -0.009  0.011   0.005   0.064  0.072  -0.001   6  -0.068  0.011  -0.063   0.027  0.028   0.029  13   0.062  0.009 
 3  0  0.979   7   0.031  0.014   0.010  -0.067  0.055   0.001   5  -0.026  0.014  -0.044  -0.015  0.034   0.014   0   0.000  0.000 
 9  5  1.002   1  -9.999  9.999   0.014  -9.999  9.999   0.001   3  -9.999  9.999  -0.034  -9.999  9.999   0.006   8  -0.002  0.013 
 4  1  1.029   4  -9.999  9.999   0.017  -9.999  9.999   0.002   2  -9.999  9.999  -0.022  -9.999  9.999  -0.004   8  -0.157  0.018 
