# Supplementary material for: OH level populations and accuracies of Einstein- A coefficients from hundreds of measured lines
Source: Copernicus journal article supplement (doi:10.5194/acp-20-5269-2020), 2020-05-06
Supplement: Supplementary file 2 [file acp-20-5269-2020-supplement.zip › OHpop_Acoeff_figdata/OHpop_Acoeff_fig11a.dat]

# Data for Fig. 11 (left) in
# 'OH level populations and accuracies of Einstein-A coefficients
# from hundreds of measured lines'
# by Noll et al.
#
# Columns:
# (1) line ID of type 'OH'+v'+v''+branch+F'+N'
# (2) E'(v',N',F') - E'(v',1,1) in cm^(-1)
# (3) Delta y for Q-P and R-P for B+16 Einstein-A coefficients
# (4) Delta y for corrected B+16 Einstein-A coefficients
#
#       1       2       3       4
 OH30Q101     0.0  -0.079  -0.048 
 OH30Q103   180.4  -0.087   0.032 
 OH30Q104   316.9  -0.115   0.048 
 OH30Q201   128.1   0.005   0.036 
 OH30Q202   181.9  -0.078  -0.003 
 OH30R102    74.9  -0.016  -0.038 
 OH30R103   180.4  -0.013  -0.045 
 OH30R104   316.9   0.094   0.052 
 OH30R106   683.8   0.158   0.095 
 OH30R202   181.9   0.025   0.004 
 OH30R204   394.9   0.082   0.040 
 OH30R205   552.7   0.007  -0.046 
 OH40Q101     0.0   0.010   0.061 
 OH40Q102    71.9  -0.156   0.039 
 OH40Q103   173.2  -0.303   0.038 
 OH40Q104   304.2  -0.441   0.045 
 OH40Q201   128.7  -0.052  -0.001 
 OH40Q202   180.1  -0.162   0.033 
 OH40Q203   265.3  -0.187   0.153 
 OH40R102    71.9  -0.063  -0.014 
 OH40R103   173.2  -0.097  -0.028 
 OH40R104   304.2  -0.062   0.027 
 OH40R106   655.9  -0.137  -0.007 
 OH40R112  2421.5  -0.288  -0.035 
 OH40R202   180.1   0.000   0.049 
 OH40R203   265.3  -0.023   0.046 
 OH40R204   383.7  -0.087   0.003 
 OH40R207   931.9  -0.322  -0.171 
 OH41Q102    71.9   0.127   0.176 
 OH41Q103   173.2  -0.302  -0.231 
 OH41R102    71.9   0.216   0.179 
 OH41R103   173.2  -0.243  -0.297 
 OH41R202   180.1  -0.023  -0.060 
 OH41R203   265.3  -0.060  -0.114 
 OH50Q101     0.0  -0.137  -0.075 
 OH50Q102    69.0  -0.299  -0.031 
 OH50R102    69.0  -0.119  -0.028 
 OH50R103   166.1  -0.136  -0.007 
 OH50R104   291.5  -0.163   0.006 
 OH50R202   178.3  -0.103  -0.013 
 OH51Q101     0.0  -0.052  -0.005 
 OH51Q105   445.5  -0.543   0.016 
 OH51Q201   129.3  -0.038   0.009 
 OH51R102    69.0  -0.037  -0.000 
 OH51R103   166.1  -0.066  -0.014 
 OH51R105   445.5  -0.096  -0.014 
 OH51R106   628.0  -0.222  -0.125 
 OH51R113  2692.2  -0.156   0.047 
 OH51R202   178.3   0.016   0.052 
 OH51R203   259.5  -0.023   0.028 
 OH51R206   691.1  -0.063   0.034 
 OH51R215  3555.7   0.060   0.293 
 OH61Q101     0.0  -0.069  -0.010 
 OH61Q102    66.0  -0.203   0.047 
 OH61Q103   158.8  -0.394   0.047 
 OH61Q201   129.8  -0.050   0.009 
 OH61Q202   176.4  -0.307  -0.057 
 OH61Q203   253.6  -0.624  -0.183 
 OH61R102    66.0  -0.039   0.041 
 OH61R104   278.6  -0.116   0.034 
 OH61R105   425.6  -0.104   0.080 
 OH61R202   176.4  -0.016   0.064 
 OH61R203   253.6  -0.070   0.045 
 OH61R205   498.2  -0.065   0.119 
 OH61R208  1082.4  -0.312  -0.025 
 OH62Q101     0.0  -0.064  -0.021 
 OH62Q102    66.0  -0.124   0.027 
 OH62Q103   158.8  -0.202   0.059 
 OH62Q104   278.6  -0.331   0.038 
 OH62Q201   129.8  -0.026   0.017 
 OH62Q202   176.4  -0.153  -0.001 
 OH62Q204   361.1  -0.536  -0.167 
 OH62Q205   498.2  -0.800  -0.322 
 OH62R102    66.0  -0.026  -0.002 
 OH62R103   158.8  -0.053  -0.020 
 OH62R104   278.6  -0.055  -0.013 
 OH62R109  1284.8  -0.092  -0.004 
 OH62R111  1874.4  -0.107  -0.001 
 OH62R113  2566.8  -0.159  -0.034 
 OH62R115  3358.3  -0.212  -0.069 
 OH62R202   176.4  -0.022   0.001 
 OH62R203   253.6  -0.042  -0.010 
 OH62R204   361.1  -0.046  -0.004 
 OH62R205   498.2  -0.078  -0.027 
 OH62R207   859.3  -0.328  -0.259 
 OH62R209  1333.2  -0.092  -0.004 
 OH62R212  2246.6  -0.249  -0.133 
 OH62R213  2603.2  -0.143  -0.018 
 OH62R215  3390.9  -0.213  -0.069 
 OH72Q101     0.0  -0.094  -0.038 
 OH72Q103   151.3  -0.306   0.100 
 OH72Q104   265.4  -0.571   0.009 
 OH72Q105   405.4  -0.815  -0.060 
 OH72Q201   130.2  -0.052   0.004 
 OH72R102    62.9  -0.149  -0.080 
 OH72R104   265.4  -0.108   0.020 
 OH72R105   405.4  -0.155   0.003 
 OH72R107   762.6  -0.223  -0.006 
 OH72R108   979.6  -0.207   0.039 
 OH72R202   174.4  -0.048   0.021 
 OH72R203   247.6  -0.069   0.030 
 OH72R204   349.5  -0.127   0.001 
 OH72R208  1033.9  -0.278  -0.032 
 OH73Q101     0.0  -0.031   0.008 
 OH73Q102    62.9  -0.064   0.063 
 OH73Q103   151.3  -0.183   0.031 
 OH73Q105   405.4  -0.394  -0.006 
 OH73Q106   571.1  -0.539  -0.064 
 OH73Q203   247.6  -0.224  -0.011 
 OH73Q205   479.6  -0.635  -0.247 
 OH73R102    62.9  -0.029  -0.021 
 OH73R103   151.3  -0.035  -0.024 
 OH73R105   405.4  -0.015   0.001 
 OH73R106   571.1  -0.029  -0.010 
 OH73R113  2438.5  -0.019   0.019 
 OH73R114  2802.1   0.073   0.113 
 OH73R202   174.4   0.035   0.044 
 OH73R203   247.6   0.103   0.114 
 OH73R209  1271.8  -0.079  -0.052 
 OH73R210  1535.5  -0.006   0.023 
 OH73R212  2138.1  -0.093  -0.059 
 OH73R213  2476.0   0.143   0.180 
 OH82Q101     0.0  -0.144  -0.080 
 OH82Q102    59.7  -0.311  -0.028 
 OH82Q103   143.6  -0.536  -0.036 
 OH82Q201   130.6  -0.073  -0.009 
 OH82R102    59.7  -0.110  -0.011 
 OH82R103   143.6  -0.140   0.002 
 OH82R104   251.8  -0.192  -0.007 
 OH82R202   172.2  -0.125  -0.026 
 OH82R203   241.3  -0.137   0.005 
 OH83Q101     0.0  -0.084  -0.032 
 OH83Q102    59.7  -0.157   0.052 
 OH83Q103   143.6  -0.285   0.080 
 OH83Q104   251.8  -0.486   0.035 
 OH83Q201   130.6   0.010   0.062 
 OH83Q202   172.2  -0.219  -0.010 
 OH83R103   143.6  -0.043   0.037 
 OH83R104   251.8  -0.078   0.026 
 OH83R105   384.4  -0.096   0.032 
 OH83R112  1984.6  -0.378  -0.084 
 OH83R202   172.2  -0.034   0.022 
 OH83R204   337.5  -0.085   0.019 
 OH83R205   460.3  -0.105   0.023 
 OH83R207   783.9  -0.051   0.124 
 OH83R208   983.8  -0.052   0.148 
 OH83R210  1457.3  -0.246   0.001 
 OH84Q101     0.0  -0.038  -0.003 
 OH84Q103   143.6  -0.134   0.026 
 OH84Q201   130.6  -0.055  -0.021 
 OH84Q202   172.2  -0.097   0.000 
 OH84Q203   241.3  -0.211  -0.051 
 OH84Q204   337.5  -0.254  -0.031 
 OH84R103   143.6   0.017   0.004 
 OH84R104   251.8   0.002  -0.016 
 OH84R105   384.4   0.138   0.115 
 OH84R108   927.9   0.061   0.023 
 OH84R202   172.2  -0.034  -0.042 
 OH84R212  2025.9  -0.123  -0.180 
 OH93Q101     0.0  -0.117  -0.056 
 OH93Q102    56.4  -0.267  -0.004 
 OH93Q103   135.5  -0.425   0.040 
 OH93Q201   130.7   0.112   0.173 
 OH93Q202   169.8  -0.260   0.003 
 OH93R102    56.4   0.085   0.173 
 OH93R103   135.5  -0.119   0.007 
 OH93R106   510.1  -0.192   0.047 
 OH93R202   169.8  -0.056   0.032 
 OH93R203   234.6  -0.116   0.009 
 OH94Q101     0.0  -0.082  -0.033 
 OH94Q102    56.4  -0.132   0.051 
 OH94Q201   130.7  -0.028   0.020 
 OH94Q202   169.8  -0.176   0.007 
 OH94Q203   234.6  -0.352  -0.033 
 OH94R104   237.5  -0.083  -0.006 
 OH94R108   873.6  -0.114   0.032 
 OH94R202   169.8  -0.039   0.002 
 OH94R203   234.6  -0.039   0.020 
 OH94R204   324.8  -0.065   0.011 
 OH94R207   743.7  -0.160  -0.032 
 OH95Q102    56.4  -0.023   0.040 
 OH95Q104   237.5  -0.189  -0.057 
 OH95Q201   130.7  -0.071  -0.042 
 OH95R206   579.8   0.027  -0.056 
