# Supplementary material for: OH level populations and accuracies of Einstein- A coefficients from hundreds of measured lines
Source: Copernicus journal article supplement (doi:10.5194/acp-20-5269-2020), 2020-05-06
Supplement: Supplementary file 2 [file acp-20-5269-2020-supplement.zip › OHpop_Acoeff_figdata/OHpop_Acoeff_fig11b.dat]

# Data for Fig. 11 (middle) in
# 'OH level populations and accuracies of Einstein-A coefficients
# from hundreds of measured lines'
# by Noll et al.
#
# Columns:
# (1) line ID of type 'OH'+v'+v''+branch+F'+N'
# (2) wavelength in mum
# (3) Delta y for different v'' for B+16 Einstein-A coefficients
# (4) Delta y for corrected B+16 Einstein-A coefficients
#
#       1         2       3       4
 OH41P101  1.037572  -0.203  -0.023 
 OH41P201  1.035013  -0.080   0.101 
 OH41P202  1.039939  -0.165   0.035 
 OH41Q102  1.029884  -0.106  -0.053 
 OH41Q103  1.031234   0.032  -0.020 
 OH41R102  1.021385  -0.110   0.005 
 OH41R103  1.019250  -0.116  -0.020 
 OH41R106  1.015179  -0.002   0.037 
 OH41R202  1.023346  -0.189  -0.074 
 OH41R203  1.020584  -0.091   0.004 
 OH41R204  1.018383  -0.103  -0.027 
 OH41R205  1.016716  -0.137  -0.079 
 OH50P101  0.620444   0.067   0.030 
 OH50P102  0.622349   0.096   0.047 
 OH50P103  0.624537   0.079   0.018 
 OH50P104  0.627014   0.069  -0.003 
 OH50P105  0.629785  -0.043  -0.128 
 OH50P201  0.619465   0.000  -0.037 
 OH50P202  0.621478   0.083   0.034 
 OH50P204  0.626349   0.078   0.005 
 OH50Q101  0.617235  -0.018  -0.040 
 OH50R102  0.614618   0.014   0.019 
 OH50R103  0.614116   0.009   0.026 
 OH50R202  0.615263  -0.036  -0.031 
 OH50R203  0.614507  -0.085  -0.069 
 OH61P101  0.653485   0.059  -0.005 
 OH61P102  0.655543   0.062  -0.014 
 OH61P103  0.657910   0.092   0.003 
 OH61P104  0.660596   0.080  -0.022 
 OH61P105  0.663606   0.072  -0.042 
 OH61P106  0.666947   0.063  -0.064 
 OH61P109  0.679015   0.141  -0.024 
 OH61P201  0.652423   0.042  -0.022 
 OH61P202  0.654583   0.065  -0.012 
 OH61P203  0.657059   0.082  -0.007 
 OH61P204  0.659847   0.051  -0.050 
 OH61P205  0.662945   0.017  -0.097 
 OH61P207  0.670100   0.060  -0.080 
 OH61P209  0.678587   0.041  -0.124 
 OH61Q101  0.650052   0.054   0.005 
 OH61Q102  0.650679  -0.016   0.006 
 OH61Q103  0.651579  -0.101  -0.010 
 OH61Q201  0.649932   0.019  -0.030 
 OH61Q202  0.650446  -0.089  -0.068 
 OH61R102  0.647276   0.049   0.029 
 OH61R104  0.646531   0.020   0.025 
 OH61R202  0.647970   0.071   0.051 
 OH61R203  0.647193   0.055   0.048 
 OH61R205  0.646668   0.030   0.048 
 OH72P103  0.695096  -0.119   0.005 
 OH72P104  0.698034  -0.104   0.007 
 OH72P105  0.701335  -0.068   0.029 
 OH72P113  0.741901   0.011   0.001 
 OH72P115  0.756465  -0.053  -0.090 
 OH72P202  0.691453  -0.127   0.010 
 OH72P203  0.694144  -0.125  -0.001 
 OH72P204  0.697185  -0.112  -0.002 
 OH72P205  0.700579  -0.130  -0.032 
 OH72P208  0.712941  -0.169  -0.112 
 OH72P209  0.717824  -0.155  -0.112 
 OH72P210  0.723108  -0.080  -0.049 
 OH72P212  0.734941  -0.101  -0.098 
 OH72P214  0.748580  -0.016  -0.039 
 OH72Q101  0.686585  -0.158   0.010 
 OH72Q103  0.688298  -0.242   0.074 
 OH72Q105  0.691283  -0.489  -0.025 
 OH72Q201  0.686458  -0.173  -0.004 
 OH72R102  0.683632  -0.127   0.072 
 OH72R105  0.683036  -0.208   0.031 
 OH72R202  0.684383  -0.211  -0.012 
 OH72R203  0.683590  -0.297  -0.085 
 OH82P101  0.591694   0.044   0.037 
 OH82P102  0.593451   0.029   0.012 
 OH82P103  0.595507   0.041   0.015 
 OH82P104  0.597873   0.031  -0.004 
 OH82P105  0.600558   0.043  -0.002 
 OH82P106  0.603567  -0.011  -0.066 
 OH82P201  0.590834   0.029   0.022 
 OH82P202  0.592637   0.054   0.038 
 OH82P203  0.594758   0.016  -0.011 
 OH82P204  0.597193   0.053   0.018 
 OH82P205  0.599943  -0.069  -0.114 
 OH82P206  0.603010   0.026  -0.028 
 OH82P207  0.606404   0.100   0.036 
 OH82Q101  0.588981  -0.015  -0.011 
 OH82Q102  0.589610  -0.125  -0.068 
 OH82Q103  0.590511  -0.210  -0.100 
 OH82Q201  0.588876  -0.053  -0.049 
 OH82R103  0.586708  -0.055  -0.019 
 OH82R104  0.586762  -0.083  -0.038 
 OH82R202  0.587436  -0.037  -0.010 
 OH84P101  0.944224   0.051   0.007 
 OH84P102  0.947946   0.005  -0.024 
 OH84P103  0.952197   0.004  -0.011 
 OH84P104  0.956997   0.014   0.013 
 OH84P105  0.962361  -0.118  -0.104 
 OH84P106  0.968304  -0.006   0.022 
 OH84P201  0.942232   0.082   0.038 
 OH84P202  0.946113   0.081   0.051 
 OH84P203  0.950542   0.013  -0.002 
 OH84P204  0.955515   0.022   0.022 
 OH84P207  0.973769   0.020   0.062 
 OH84P208  0.981018   0.103   0.160 
 OH84Q101  0.937853   0.098   0.036 
 OH84Q103  0.940466   0.156  -0.064 
 OH84Q201  0.937689   0.016  -0.045 
 OH84Q202  0.938549   0.203   0.062 
 OH84Q203  0.939967   0.295   0.075 
 OH84R103  0.931590   0.065  -0.044 
 OH84R104  0.930993   0.094  -0.029 
 OH84R105  0.930855   0.117  -0.021 
 OH84R108  0.933366   0.138  -0.042 
 OH84R202  0.934042   0.081  -0.013 
 OH84R210  0.937469   0.154  -0.055 
 OH93P101  0.628917  -0.046   0.024 
 OH93P102  0.630867  -0.039   0.021 
 OH93P104  0.635806  -0.033   0.006 
 OH93P106  0.642208  -0.003   0.016 
 OH93P108  0.650156   0.004   0.002 
 OH93P202  0.629964  -0.065  -0.005 
 OH93P203  0.632315  -0.055  -0.006 
 OH93P204  0.635029  -0.033   0.007 
 OH93P206  0.641558  -0.055  -0.036 
 OH93P208  0.649607   0.012   0.011 
 OH93Q101  0.625969  -0.081   0.002 
 OH93Q102  0.626695  -0.173  -0.034 
 OH93Q103  0.627733  -0.237  -0.041 
 OH93Q201  0.625867  -0.138  -0.055 
 OH93Q202  0.626447  -0.148  -0.009 
 OH93R103  0.623602  -0.120  -0.004 
 OH93R202  0.624341  -0.081   0.025 
 OH93R203  0.623914  -0.133  -0.016 
 OH95P102  1.012678  -0.038  -0.001 
 OH95P104  1.022859  -0.030   0.038 
 OH95P201  1.006347   0.011   0.033 
 OH95P204  1.021158  -0.048   0.020 
 OH95Q101  1.001555   0.035   0.037 
 OH95Q102  1.002820   0.072  -0.012 
 OH95Q103  1.004627   0.126  -0.042 
 OH95Q201  1.001408  -0.031  -0.029 
 OH95Q202  1.002408   0.161   0.078 
 OH95R103  0.994924  -0.009  -0.058 
 OH95R202  0.997508  -0.005  -0.039 
