# Supplementary material for: OH level populations and accuracies of Einstein- A coefficients from hundreds of measured lines
Source: Copernicus journal article supplement (doi:10.5194/acp-20-5269-2020), 2020-05-06
Supplement: Supplementary file 2 [file acp-20-5269-2020-supplement.zip › OHpop_Acoeff_figdata/OHpop_Acoeff_fig11c.dat]

# Data for Fig. 11 (right) in
# 'OH level populations and accuracies of Einstein-A coefficients
# from hundreds of measured lines'
# by Noll et al.
#
# Columns:
# (1) line ID of type 'OH'+v'+v''+branch+F'+N'
# (2) E'(p'=f) - E'(p'=e) in cm^(-1)
# (3) Delta y for Lambda doublet parities p' = f and e
#     and B+16 Einstein-A coefficients
# (4) Delta y for corrected B+16 Einstein-A coefficients
#
#       1       2       3       4
 OH30P104    0.64  -0.013   0.002 
 OH30P105    1.01   0.025   0.078 
 OH30P106    1.45  -0.321  -0.231 
 OH30Q103    0.36   0.022   0.017 
 OH30Q104    0.64  -0.058  -0.126 
 OH40P104    0.59  -0.037  -0.023 
 OH40P105    0.94  -0.151  -0.099 
 OH40P106    1.35  -0.099  -0.009 
 OH40P112    5.05  -0.440  -0.114 
 OH40P113    5.82  -0.357   0.010 
 OH40P207   -0.45   0.200   0.082 
 OH40P210   -1.68   0.461   0.230 
 OH40P214   -4.03   0.583   0.196 
 OH40P220   -8.50   0.773   0.143 
 OH40Q103    0.33   0.039   0.033 
 OH40Q104    0.59   0.083   0.014 
 OH41Q103    0.33  -0.013  -0.018 
 OH50P105    0.86   0.285   0.336 
 OH51P104    0.54  -0.027  -0.013 
 OH51P105    0.86  -0.033   0.018 
 OH51P107    1.69  -0.104   0.023 
 OH51P108    2.19  -0.230  -0.064 
 OH51P113    5.41  -0.359   0.004 
 OH51P115    6.95  -0.469  -0.025 
 OH51P120   11.10  -0.459   0.190 
 OH51P208   -0.73   0.199   0.045 
 OH51P212   -2.57   0.417   0.110 
 OH51P214   -3.74   0.590   0.205 
 OH51P215   -4.38   0.365  -0.060 
 OH51P216   -5.05   0.456  -0.009 
 OH51P217   -5.73   0.465  -0.039 
 OH51Q105    0.86   0.115  -0.017 
 OH51R113    5.41   0.049   0.108 
 OH61P105    0.78  -0.073  -0.022 
 OH61P106    1.14  -0.119  -0.031 
 OH61P107    1.55  -0.279  -0.153 
 OH61P109    2.53  -0.225  -0.022 
 OH61P209   -1.02   0.403   0.212 
 OH61P210   -1.42   0.367   0.138 
 OH62P104    0.49  -0.039  -0.025 
 OH62P105    0.78  -0.042   0.008 
 OH62P106    1.14  -0.092  -0.004 
 OH62P108    2.01  -0.175  -0.011 
 OH62P109    2.53  -0.260  -0.057 
 OH62P111    3.68  -0.245   0.036 
 OH62P113    4.98  -0.310   0.050 
 OH62P114    5.67  -0.312   0.089 
 OH62P115    6.38  -0.509  -0.069 
 OH62P119    9.38  -0.635  -0.033 
 OH62P207   -0.36   0.425   0.308 
 OH62P208   -0.66   0.234   0.080 
 OH62P209   -1.02   0.276   0.084 
 OH62P212   -2.36   0.527   0.221 
 OH62P213   -2.88   0.348   0.004 
 OH62P214   -3.44   0.333  -0.050 
 OH62P215   -4.03   0.423   0.000 
 OH62Q103    0.27   0.020   0.014 
 OH62Q104    0.49   0.069  -0.001 
 OH62R112    4.31  -0.171  -0.139 
 OH62R113    4.98  -0.141  -0.086 
 OH62R115    6.38  -0.212  -0.077 
 OH62R117    7.86  -0.254  -0.039 
 OH62R215   -4.03   0.218   0.101 
 OH72P105    0.71  -0.065  -0.015 
 OH72P108    1.83  -0.195  -0.033 
 OH72P110    2.80  -0.310  -0.070 
 OH72P111    3.35  -0.314  -0.036 
 OH72P113    4.52  -0.324   0.033 
 OH72P115    5.79  -0.462  -0.026 
 OH72P208   -0.60   0.142  -0.011 
 OH72P209   -0.93   0.146  -0.044 
 OH72P210   -1.30   0.273   0.045 
 OH72P212   -2.16   0.295  -0.009 
 OH72P214   -3.14   0.336  -0.044 
 OH72Q104    0.44   0.154   0.084 
 OH72Q105    0.71   0.300   0.166 
 OH73P104    0.44  -0.021  -0.008 
 OH73P105    0.71  -0.036   0.014 
 OH73P106    1.03  -0.095  -0.008 
 OH73P107    1.40  -0.118   0.007 
 OH73P109    2.29  -0.157   0.044 
 OH73P113    4.52  -0.220   0.137 
 OH73P114    5.15  -0.200   0.196 
 OH73P208   -0.60   0.247   0.094 
 OH73P209   -0.93   0.226   0.035 
 OH73P210   -1.30   0.235   0.007 
 OH73P212   -2.16   0.271  -0.033 
 OH73P214   -3.14   0.226  -0.155 
 OH73Q103    0.24   0.025   0.019 
 OH73Q105    0.71   0.043  -0.090 
 OH73Q106    1.03   0.232   0.036 
 OH73R113    4.52  -0.183  -0.131 
 OH73R114    5.15   0.376   0.467 
 OH82P105    0.62  -0.076  -0.026 
 OH82P106    0.91  -0.168  -0.082 
 OH82P107    1.25   0.056   0.179 
 OH83P105    0.62  -0.066  -0.017 
 OH83P106    0.91  -0.075   0.011 
 OH83P108    1.62  -0.108   0.053 
 OH83P208   -0.54   0.125  -0.028 
 OH83P210   -1.17   0.203  -0.024 
 OH83P211   -1.54   0.194  -0.071 
 OH83Q104    0.39   0.107   0.036 
 OH83R111    2.98   0.019   0.041 
 OH83R112    3.49   0.120   0.146 
 OH83R113    4.03  -0.153  -0.105 
 OH84P104    0.39  -0.001   0.012 
 OH84P105    0.62  -0.126  -0.076 
 OH84P106    0.91  -0.060   0.027 
 OH84P107    1.25  -0.040   0.083 
 OH84P207   -0.30   0.072  -0.045 
 OH84P208   -0.54  -0.201  -0.354 
 OH84P209   -0.84   0.118  -0.072 
 OH84Q103    0.21   0.019   0.012 
 OH93P105    0.54  -0.067  -0.018 
 OH93P106    0.79  -0.028   0.057 
 OH93P107    1.08   0.038   0.160 
 OH93P108    1.41  -0.103   0.056 
 OH93P208   -0.50   0.145  -0.007 
 OH94P104    0.33   0.044   0.057 
 OH94P106    0.79  -0.037   0.048 
 OH94P108    1.41  -0.004   0.155 
 OH94P110    2.17   0.045   0.279 
 OH94P208   -0.50   0.023  -0.130 
 OH94Q105    0.54   0.096  -0.038 
 OH95P104    0.33   0.009   0.021 
 OH95Q103    0.18   0.023   0.016 
 OH95Q104    0.33  -0.087  -0.157 
