# Supplementary material for: OH level populations and accuracies of Einstein- A coefficients from hundreds of measured lines
Source: Copernicus journal article supplement (doi:10.5194/acp-20-5269-2020), 2020-05-06
Supplement: Supplementary file 2 [file acp-20-5269-2020-supplement.zip › OHpop_Acoeff_figdata/OHpop_Acoeff_fig12.dat]

# Data for Fig. 12 in
# 'OH level populations and accuracies of Einstein-A coefficients
# from hundreds of measured lines'
# by Noll et al.
#
# Columns:
# (1) line ID of type 'OH'+v'+v''+branch+F'+N'
# (2) E' in cm^(-1)
# (3) y for corrected B+16 Einstein-A coefficients
#
#       1       2       3
 OH30Q101     0.0   3.964 
 OH30P101     0.0   4.012 
 OH30R102    74.9   3.429 
 OH30Q102    74.9   3.446 
 OH30P102    74.9   3.467 
 OH30Q201   128.1   3.056 
 OH30P201   128.1   3.020 
 OH30R103   180.4   2.623 
 OH30Q103   180.4   2.700 
 OH30P103   180.4   2.668 
 OH30R202   181.9   2.622 
 OH30Q202   181.9   2.615 
 OH30P202   181.9   2.618 
 OH30R203   271.1   1.965 
 OH30Q203   271.1   1.877 
 OH30R104   316.9   1.632 
 OH30Q104   316.9   1.629 
 OH30P104   316.9   1.581 
 OH30R204   394.9   1.063 
 OH30Q204   394.9   0.916 
 OH30P204   394.9   1.023 
 OH30Q105   484.7   0.446 
 OH30P105   484.7   0.446 
 OH30R205   552.7  -0.045 
 OH30P205   552.7   0.001 
 OH30R106   683.8  -0.878 
 OH30P106   683.8  -0.973 
 OH30P107   914.1  -1.689 
 OH30R207   968.0  -2.029 
 OH30R108  1175.6  -2.393 
 OH30R209  1512.5  -2.850 
 OH40Q101     0.0   3.796 
 OH40P101     0.0   3.736 
 OH41P101     0.0   3.556 
 OH40R102    71.9   3.215 
 OH40Q102    71.9   3.268 
 OH40P102    71.9   3.229 
 OH41R102    71.9   3.063 
 OH41Q102    71.9   3.059 
 OH41P102    71.9   2.883 
 OH40Q201   128.7   2.740 
 OH40P201   128.7   2.741 
 OH41Q201   128.7   2.306 
 OH41P201   128.7   2.685 
 OH40R103   173.2   2.454 
 OH40Q103   173.2   2.520 
 OH40P103   173.2   2.482 
 OH41R103   173.2   2.277 
 OH41Q103   173.2   2.343 
 OH41P103   173.2   2.574 
 OH40R202   180.1   2.398 
 OH40Q202   180.1   2.383 
 OH40P202   180.1   2.350 
 OH41R202   180.1   2.167 
 OH41Q202   180.1   1.817 
 OH41P202   180.1   2.227 
 OH40R203   265.3   1.761 
 OH40Q203   265.3   1.869 
 OH40P203   265.3   1.716 
 OH41R203   265.3   1.609 
 OH41Q203   265.3   1.347 
 OH41P203   265.3   1.723 
 OH40R104   304.2   1.491 
 OH40Q104   304.2   1.509 
 OH40P104   304.2   1.464 
 OH41Q104   304.2   1.183 
 OH40R204   383.7   0.889 
 OH40Q204   383.7   0.798 
 OH40P204   383.7   0.886 
 OH41R204   383.7   0.705 
 OH40Q105   465.1   0.373 
 OH40P105   465.1   0.392 
 OH41R105   465.1   0.156 
 OH40R205   534.6  -0.154 
 OH41R205   534.6  -0.390 
 OH40R106   655.9  -0.905 
 OH40P106   655.9  -0.898 
 OH41R106   655.9  -1.024 
 OH40P206   717.5  -0.965 
 OH40R107   876.7  -1.782 
 OH40P107   876.7  -1.377 
 OH40R207   931.9  -2.108 
 OH40P207   931.9  -1.937 
 OH40P108  1127.2  -2.281 
 OH40P110  1716.5  -2.452 
 OH40R210  1758.7  -2.721 
 OH40P210  1758.7  -2.685 
 OH40R111  2054.8  -2.474 
 OH40P111  2054.8  -2.143 
 OH40R211  2093.9  -2.427 
 OH40R112  2421.5  -2.570 
 OH40P112  2421.5  -2.535 
 OH40R212  2458.0  -2.595 
 OH40P212  2458.0  -2.741 
 OH40R113  2816.3  -2.481 
 OH40P113  2816.3  -2.727 
 OH40P213  2850.6  -3.048 
 OH40P114  3238.6  -2.813 
 OH40P214  3271.0  -3.113 
 OH40P115  3687.9  -2.984 
 OH40P215  3718.6  -3.239 
 OH40P116  4163.7  -3.053 
 OH40P117  4665.2  -3.076 
 OH40R217  4693.2  -2.688 
 OH40P218  5218.7  -3.258 
 OH40P119  5743.1  -3.675 
 OH40P120  6318.0  -3.793 
 OH40P220  6342.9  -3.546 
 OH40P221  6939.9  -3.406 
 OH40P222  7559.2  -3.816 
 OH40P123  8177.3  -3.482 
 OH40P223  8199.9  -4.057 
 OH40P124  8839.2  -4.092 
 OH40P224  8861.3  -3.840 
 OH50Q101     0.0   3.060 
 OH50P101     0.0   3.135 
 OH51Q101     0.0   3.257 
 OH51P101     0.0   3.262 
 OH50R102    69.0   2.602 
 OH50Q102    69.0   2.599 
 OH50P102    69.0   2.630 
 OH51R102    69.0   2.740 
 OH51P102    69.0   2.740 
 OH50Q201   129.3   1.805 
 OH50P201   129.3   2.083 
 OH51Q201   129.3   2.286 
 OH51P201   129.3   2.277 
 OH50R103   166.1   1.872 
 OH50P103   166.1   1.879 
 OH51R103   166.1   2.003 
 OH51Q103   166.1   2.073 
 OH51P103   166.1   2.017 
 OH50R202   178.3   1.776 
 OH50Q202   178.3   1.783 
 OH50P202   178.3   1.789 
 OH51R202   178.3   1.963 
 OH51Q202   178.3   2.271 
 OH51P202   178.3   1.911 
 OH50R203   259.5   1.115 
 OH51R203   259.5   1.340 
 OH51Q203   259.5   1.779 
 OH51P203   259.5   1.312 
 OH50R104   291.5   0.945 
 OH50P104   291.5   0.939 
 OH51Q104   291.5   1.275 
 OH51P104   291.5   1.099 
 OH50P204   372.4   0.344 
 OH51P204   372.4   0.496 
 OH50P105   445.5  -0.259 
 OH51R105   445.5   0.012 
 OH51Q105   445.5   0.042 
 OH51P105   445.5   0.026 
 OH51Q205   516.5  -1.232 
 OH51P205   516.5  -0.480 
 OH50P106   628.0  -1.362 
 OH51R106   628.0  -1.117 
 OH51Q106   628.0  -1.139 
 OH51P106   628.0  -0.993 
 OH51R206   691.1  -1.487 
 OH51P206   691.1  -1.521 
 OH51P107   839.2  -1.995 
 OH51P207   895.8  -2.247 
 OH51P108  1078.7  -2.492 
 OH51P208  1130.0  -2.710 
 OH50P109  1346.4  -2.706 
 OH51P109  1346.4  -2.688 
 OH50P209  1393.3  -2.716 
 OH51P209  1393.3  -2.920 
 OH51P110  1641.9  -2.613 
 OH51P111  1965.0  -2.693 
 OH51P211  2005.3  -2.913 
 OH50P112  2315.3  -2.812 
 OH51P212  2352.9  -3.048 
 OH50P113  2692.2  -3.144 
 OH51R113  2692.2  -2.911 
 OH51P113  2692.2  -2.957 
 OH51R213  2727.5  -3.251 
 OH51P213  2727.5  -3.138 
 OH51R114  3095.3  -3.277 
 OH51P114  3095.3  -3.188 
 OH50P214  3128.7  -3.537 
 OH51R214  3128.7  -3.434 
 OH51P214  3128.7  -3.404 
 OH51R115  3524.1  -3.335 
 OH51P115  3524.1  -3.310 
 OH51R215  3555.7  -3.169 
 OH51P215  3555.7  -3.462 
 OH50P116  3977.9  -3.259 
 OH51R116  3977.9  -3.072 
 OH50P216  4008.0  -3.482 
 OH51R216  4008.0  -3.084 
 OH51P216  4008.0  -3.455 
 OH51R117  4456.2  -3.528 
 OH51P117  4456.2  -3.212 
 OH51P217  4485.0  -3.451 
 OH51R118  4958.3  -3.504 
 OH51P118  4958.3  -3.339 
 OH50P218  4985.9  -2.842 
 OH51P119  5483.4  -3.834 
 OH51P219  5510.0  -3.797 
 OH51P120  6030.9  -4.070 
 OH51P220  6056.5  -4.348 
 OH61Q101     0.0   2.711 
 OH61P101     0.0   2.721 
 OH62Q101     0.0   2.683 
 OH62P101     0.0   2.704 
 OH61R102    66.0   2.265 
 OH61Q102    66.0   2.272 
 OH61P102    66.0   2.224 
 OH62R102    66.0   2.214 
 OH62Q102    66.0   2.244 
 OH62P102    66.0   2.217 
 OH61Q201   129.8   1.720 
 OH61P201   129.8   1.711 
 OH62Q201   129.8   1.727 
 OH62P201   129.8   1.711 
 OH61Q103   158.8   1.594 
 OH61P103   158.8   1.547 
 OH62R103   158.8   1.502 
 OH62Q103   158.8   1.582 
 OH62P103   158.8   1.523 
 OH61R202   176.4   1.439 
 OH61Q202   176.4   1.318 
 OH61P202   176.4   1.375 
 OH62R202   176.4   1.366 
 OH62Q202   176.4   1.364 
 OH62P202   176.4   1.365 
 OH61R203   253.6   0.870 
 OH61Q203   253.6   0.641 
 OH61P203   253.6   0.824 
 OH62R203   253.6   0.799 
 OH62P203   253.6   0.809 
 OH61R104   278.6   0.674 
 OH61Q104   278.6   0.591 
 OH61P104   278.6   0.640 
 OH62R104   278.6   0.626 
 OH62Q104   278.6   0.678 
 OH62P104   278.6   0.640 
 OH61P204   361.1   0.004 
 OH62R204   361.1   0.028 
 OH62Q204   361.1  -0.134 
 OH62P204   361.1   0.032 
 OH61R105   425.6  -0.301 
 OH61P105   425.6  -0.381 
 OH62Q105   425.6  -0.408 
 OH62P105   425.6  -0.361 
 OH61R205   498.2  -0.846 
 OH61P205   498.2  -0.965 
 OH62R205   498.2  -0.917 
 OH62Q205   498.2  -1.212 
 OH62P205   498.2  -0.890 
 OH61P106   599.9  -1.467 
 OH62Q106   599.9  -1.686 
 OH62P106   599.9  -1.425 
 OH61P206   664.4  -1.879 
 OH62R206   664.4  -1.831 
 OH61P107   801.3  -2.200 
 OH62R107   801.3  -2.297 
 OH62P107   801.3  -2.268 
 OH61P207   859.3  -2.379 
 OH62R207   859.3  -2.581 
 OH62P207   859.3  -2.322 
 OH61R108  1029.7  -2.839 
 OH62P108  1029.7  -2.662 
 OH61R208  1082.4  -2.841 
 OH61P208  1082.4  -2.816 
 OH62P208  1082.4  -2.909 
 OH61P109  1284.8  -2.873 
 OH62R109  1284.8  -2.875 
 OH62P109  1284.8  -2.871 
 OH61R209  1333.2  -3.232 
 OH61P209  1333.2  -3.175 
 OH62R209  1333.2  -3.077 
 OH62P209  1333.2  -3.074 
 OH61R110  1566.5  -2.867 
 OH61P110  1566.5  -2.987 
 OH62R110  1566.5  -2.944 
 OH62P110  1566.5  -2.895 
 OH61P210  1611.1  -3.199 
 OH62R210  1611.1  -3.195 
 OH62P210  1611.1  -3.147 
 OH61P111  1874.4  -3.078 
 OH62R111  1874.4  -2.981 
 OH62P111  1874.4  -2.980 
 OH61P211  1915.8  -3.261 
 OH62R211  1915.8  -3.259 
 OH62P211  1915.8  -3.261 
 OH61P112  2207.9  -3.220 
 OH62R112  2207.9  -3.084 
 OH62P112  2207.9  -3.074 
 OH61P212  2246.6  -3.400 
 OH62R212  2246.6  -3.283 
 OH62P212  2246.6  -3.150 
 OH61P113  2566.8  -3.338 
 OH62R113  2566.8  -3.253 
 OH62P113  2566.8  -3.219 
 OH61P213  2603.2  -3.479 
 OH62R213  2603.2  -3.494 
 OH62P213  2603.2  -3.476 
 OH61P114  2950.4  -3.640 
 OH62R114  2950.4  -3.441 
 OH62P114  2950.4  -3.539 
 OH61P214  2984.8  -3.843 
 OH62P214  2984.8  -3.703 
 OH61P115  3358.3  -3.844 
 OH62R115  3358.3  -3.677 
 OH62P115  3358.3  -3.608 
 OH61P215  3390.9  -4.062 
 OH62R215  3390.9  -3.909 
 OH62P215  3390.9  -3.839 
 OH61P116  3789.8  -3.732 
 OH62R116  3789.8  -3.644 
 OH62P116  3789.8  -3.669 
 OH62R216  3820.8  -3.907 
 OH61P117  4244.3  -4.009 
 OH62R117  4244.3  -3.706 
 OH62R217  4274.0  -3.940 
 OH62P217  4274.0  -3.812 
 OH61P118  4721.2  -3.866 
 OH62R118  4721.2  -4.024 
 OH62P118  4721.2  -3.887 
 OH62R218  4749.7  -4.147 
 OH62P218  4749.7  -4.139 
 OH61P119  5219.8  -4.697 
 OH62P119  5219.8  -4.144 
 OH62P219  5247.1  -3.536 
 OH72Q101     0.0   2.456 
 OH72P101     0.0   2.494 
 OH73Q101     0.0   2.398 
 OH73P101     0.0   2.391 
 OH72R102    62.9   2.033 
 OH72P102    62.9   2.113 
 OH73R102    62.9   1.913 
 OH73Q102    62.9   1.997 
 OH73P102    62.9   1.934 
 OH72Q201   130.2   1.493 
 OH72P201   130.2   1.488 
 OH73Q201   130.2   1.449 
 OH72Q103   151.3   1.443 
 OH72P103   151.3   1.344 
 OH73R103   151.3   1.266 
 OH73Q103   151.3   1.321 
 OH73P103   151.3   1.290 
 OH72R202   174.4   1.197 
 OH72P202   174.4   1.176 
 OH73R202   174.4   1.161 
 OH73P202   174.4   1.117 
 OH72R203   247.6   0.664 
 OH72P203   247.6   0.634 
 OH73R203   247.6   0.701 
 OH73Q203   247.6   0.576 
 OH73P203   247.6   0.587 
 OH72R104   265.4   0.536 
 OH72Q104   265.4   0.524 
 OH72P104   265.4   0.515 
 OH73Q104   265.4   0.470 
 OH73P104   265.4   0.460 
 OH72R204   349.5  -0.094 
 OH72P204   349.5  -0.095 
 OH73P204   349.5  -0.141 
 OH72R105   405.4  -0.413 
 OH72Q105   405.4  -0.475 
 OH72P105   405.4  -0.416 
 OH73R105   405.4  -0.492 
 OH73Q105   405.4  -0.499 
 OH73P105   405.4  -0.493 
 OH72P205   479.6  -0.932 
 OH73Q205   479.6  -1.195 
 OH73P205   479.6  -0.948 
 OH72P106   571.1  -1.396 
 OH73R106   571.1  -1.435 
 OH73Q106   571.1  -1.489 
 OH73P106   571.1  -1.425 
 OH72P206   637.3  -1.783 
 OH72R107   762.6  -2.076 
 OH72P107   762.6  -2.108 
 OH73P107   762.6  -2.138 
 OH72R207   822.2  -2.424 
 OH73P207   822.2  -2.434 
 OH72R108   979.6  -2.476 
 OH72P108   979.6  -2.515 
 OH73Q108   979.6  -2.698 
 OH73P108   979.6  -2.579 
 OH72R208  1033.9  -2.749 
 OH72P208  1033.9  -2.717 
 OH73P208  1033.9  -2.654 
 OH72R109  1222.1  -2.709 
 OH72P109  1222.1  -2.753 
 OH73P109  1222.1  -2.788 
 OH72P209  1271.8  -3.054 
 OH73R209  1271.8  -3.043 
 OH73P209  1271.8  -2.991 
 OH72P110  1489.5  -2.909 
 OH73R110  1489.5  -2.941 
 OH73P110  1489.5  -2.949 
 OH72P210  1535.5  -3.165 
 OH73R210  1535.5  -3.141 
 OH73P210  1535.5  -3.164 
 OH72R111  1781.7  -3.033 
 OH72P111  1781.7  -3.092 
 OH73R111  1781.7  -3.022 
 OH73P111  1781.7  -2.965 
 OH72R211  1824.4  -3.285 
 OH72R112  2098.2  -3.148 
 OH73R112  2098.2  -3.336 
 OH73P112  2098.2  -3.250 
 OH72R212  2138.1  -3.446 
 OH72P212  2138.1  -3.450 
 OH73R212  2138.1  -3.459 
 OH73P212  2138.1  -3.400 
 OH72P113  2438.5  -3.468 
 OH73R113  2438.5  -3.498 
 OH73P113  2438.5  -3.517 
 OH72P213  2476.0  -3.695 
 OH73R213  2476.0  -3.719 
 OH73P213  2476.0  -3.899 
 OH72R114  2802.1  -3.581 
 OH72P114  2802.1  -4.016 
 OH73R114  2802.1  -3.754 
 OH73P114  2802.1  -3.868 
 OH72P214  2837.6  -4.120 
 OH73R214  2837.6  -4.252 
 OH73P214  2837.6  -4.129 
 OH72P115  3188.5  -4.270 
 OH73R115  3188.5  -3.725 
 OH73P115  3188.5  -4.229 
 OH73R215  3222.1  -4.558 
 OH73P215  3222.1  -4.534 
 OH73R116  3597.0  -4.322 
 OH73R216  3629.1  -4.336 
 OH72P117  4027.1  -4.627 
 OH73R117  4027.1  -4.800 
 OH72P217  4057.7  -4.635 
 OH73R217  4057.7  -4.700 
 OH73P217  4057.7  -4.291 
 OH73R118  4478.0  -5.022 
 OH73P118  4478.0  -4.768 
 OH72P218  4507.4  -5.034 
 OH73R218  4507.4  -5.244 
 OH82Q101     0.0   2.209 
 OH82P101     0.0   2.288 
 OH83Q101     0.0   2.157 
 OH83P101     0.0   2.189 
 OH84Q101     0.0   2.255 
 OH84P101     0.0   2.258 
 OH82R102    59.7   1.821 
 OH82Q102    59.7   1.804 
 OH82P102    59.7   1.832 
 OH83Q102    59.7   1.810 
 OH83P102    59.7   1.758 
 OH84Q102    59.7   1.871 
 OH84P102    59.7   1.796 
 OH82Q201   130.6   1.293 
 OH82P201   130.6   1.302 
 OH83Q201   130.6   1.280 
 OH83P201   130.6   1.218 
 OH84Q201   130.6   1.296 
 OH84P201   130.6   1.317 
 OH82R103   143.6   1.215 
 OH82Q103   143.6   1.177 
 OH82P103   143.6   1.212 
 OH83R103   143.6   1.172 
 OH83Q103   143.6   1.215 
 OH83P103   143.6   1.135 
 OH84R103   143.6   1.190 
 OH84Q103   143.6   1.213 
 OH84P103   143.6   1.187 
 OH82R202   172.2   0.994 
 OH82P202   172.2   1.020 
 OH83R202   172.2   0.942 
 OH83Q202   172.2   0.909 
 OH83P202   172.2   0.920 
 OH84R202   172.2   0.991 
 OH84Q202   172.2   1.034 
 OH84P202   172.2   1.033 
 OH82R203   241.3   0.491 
 OH82P203   241.3   0.486 
 OH83Q203   241.3   0.307 
 OH83P203   241.3   0.434 
 OH84Q203   241.3   0.443 
 OH84P203   241.3   0.494 
 OH82R104   251.8   0.430 
 OH82P104   251.8   0.437 
 OH83R104   251.8   0.406 
 OH83Q104   251.8   0.414 
 OH83P104   251.8   0.379 
 OH84R104   251.8   0.438 
 OH84Q104   251.8   0.513 
 OH84P104   251.8   0.454 
 OH82R204   337.5  -0.254 
 OH82P204   337.5  -0.152 
 OH83R204   337.5  -0.213 
 OH83P204   337.5  -0.232 
 OH84Q204   337.5  -0.180 
 OH84P204   337.5  -0.148 
 OH82P105   384.4  -0.438 
 OH83R105   384.4  -0.466 
 OH83Q105   384.4  -0.569 
 OH83P105   384.4  -0.498 
 OH84R105   384.4  -0.425 
 OH84Q105   384.4  -0.483 
 OH84P105   384.4  -0.540 
 OH82P205   460.3  -1.053 
 OH83R205   460.3  -0.978 
 OH83Q205   460.3  -1.405 
 OH83P205   460.3  -1.000 
 OH82R106   541.4  -1.461 
 OH82P106   541.4  -1.379 
 OH83Q106   541.4  -1.671 
 OH83P106   541.4  -1.376 
 OH84P106   541.4  -1.292 
 OH82P206   609.3  -1.775 
 OH83P206   609.3  -1.808 
 OH84R206   609.3  -1.727 
 OH82P107   722.6  -2.042 
 OH83R107   722.6  -2.074 
 OH83P107   722.6  -2.115 
 OH84P107   722.6  -2.022 
 OH82P207   783.9  -2.349 
 OH83R207   783.9  -2.323 
 OH83P207   783.9  -2.447 
 OH84P207   783.9  -2.323 
 OH83R108   927.9  -2.591 
 OH83P108   927.9  -2.641 
 OH84R108   927.9  -2.571 
 OH84P108   927.9  -2.598 
 OH82P208   983.8  -2.973 
 OH83R208   983.8  -2.813 
 OH83P208   983.8  -2.961 
 OH84P208   983.8  -2.739 
 OH82P109  1157.2  -3.323 
 OH83P109  1157.2  -3.029 
 OH84R109  1157.2  -2.996 
 OH84P109  1157.2  -2.943 
 OH83R209  1208.4  -2.954 
 OH83P209  1208.4  -3.283 
 OH84P209  1208.4  -3.206 
 OH82P110  1409.9  -3.527 
 OH82P210  1457.3  -3.599 
 OH83R210  1457.3  -3.594 
 OH83P210  1457.3  -3.595 
 OH84R210  1457.3  -3.587 
 OH84P210  1457.3  -3.597 
 OH83R111  1685.9  -3.463 
 OH83P111  1685.9  -3.593 
 OH84R111  1685.9  -3.596 
 OH84P111  1685.9  -3.599 
 OH83P211  1730.0  -3.853 
 OH84R211  1730.0  -3.861 
 OH84P211  1730.0  -3.903 
 OH82P112  1984.6  -4.050 
 OH83R112  1984.6  -3.862 
 OH83P112  1984.6  -3.801 
 OH84R112  1984.6  -3.860 
 OH82P212  2025.9  -4.214 
 OH83P212  2025.9  -4.200 
 OH84R212  2025.9  -4.019 
 OH84P212  2025.9  -3.839 
 OH82P113  2305.6  -4.318 
 OH83R113  2305.6  -4.129 
 OH83P113  2305.6  -4.454 
 OH84R113  2305.6  -4.181 
 OH82P213  2344.4  -4.514 
 OH82P114  2648.4  -5.172 
 OH83R114  2648.4  -5.069 
 OH83P114  2648.4  -5.028 
 OH84R114  2648.4  -5.113 
 OH83R214  2685.0  -5.078 
 OH83P214  2685.0  -5.519 
 OH83P215  3047.1  -6.021 
 OH83P116  3396.8  -6.918 
 OH93Q101     0.0   1.743 
 OH93P101     0.0   1.798 
 OH94Q101     0.0   1.743 
 OH94P101     0.0   1.776 
 OH95Q101     0.0   1.778 
 OH93R102    56.4   1.541 
 OH93Q102    56.4   1.364 
 OH93P102    56.4   1.368 
 OH94Q102    56.4   1.400 
 OH94P102    56.4   1.349 
 OH95Q102    56.4   1.386 
 OH95P102    56.4   1.346 
 OH93Q201   130.7   0.762 
 OH93P201   130.7   0.589 
 OH94Q201   130.7   0.818 
 OH94P201   130.7   0.799 
 OH95Q201   130.7   0.787 
 OH95P201   130.7   0.829 
 OH93R103   135.5   0.789 
 OH93Q103   135.5   0.822 
 OH93P103   135.5   0.782 
 OH94R103   135.5   0.795 
 OH94Q103   135.5   0.865 
 OH95R103   135.5   0.735 
 OH95Q103   135.5   0.820 
 OH93R202   169.8   0.537 
 OH93Q202   169.8   0.508 
 OH93P202   169.8   0.505 
 OH94R202   169.8   0.514 
 OH94Q202   169.8   0.518 
 OH94P202   169.8   0.511 
 OH95R202   169.8   0.473 
 OH95Q202   169.8   0.594 
 OH93R203   234.6   0.035 
 OH93P203   234.6   0.026 
 OH94R203   234.6   0.053 
 OH94Q203   234.6   0.000 
 OH94P203   234.6   0.033 
 OH95Q203   234.6   0.076 
 OH93R104   237.5   0.095 
 OH93Q104   237.5   0.099 
 OH93P104   237.5   0.069 
 OH94R104   237.5   0.058 
 OH94P104   237.5   0.065 
 OH95Q104   237.5   0.043 
 OH95P104   237.5   0.100 
 OH93R204   324.8  -0.574 
 OH93P204   324.8  -0.592 
 OH94R204   324.8  -0.586 
 OH94P204   324.8  -0.597 
 OH95P204   324.8  -0.580 
 OH93P105   362.4  -0.796 
 OH94R105   362.4  -0.790 
 OH94Q105   362.4  -0.835 
 OH94P105   362.4  -0.828 
 OH93P205   440.0  -1.353 
 OH93R106   510.1  -1.667 
 OH93P106   510.1  -1.714 
 OH94Q106   510.1  -1.832 
 OH94P106   510.1  -1.728 
 OH95Q106   510.1  -1.387 
 OH95P106   510.1  -1.837 
 OH93R206   579.8  -2.196 
 OH93P206   579.8  -2.238 
 OH94P206   579.8  -2.200 
 OH95R206   579.8  -2.043 
 OH95P206   579.8  -1.987 
 OH93R107   680.6  -2.347 
 OH93P107   680.6  -2.549 
 OH94R107   680.6  -2.570 
 OH94Q107   680.6  -2.988 
 OH94P107   680.6  -2.620 
 OH94R207   743.7  -2.775 
 OH94P207   743.7  -2.743 
 OH93R108   873.6  -3.405 
 OH93P108   873.6  -3.337 
 OH94R108   873.6  -3.306 
 OH94P108   873.6  -3.337 
 OH93P208   931.2  -3.719 
 OH94R208   931.2  -3.541 
 OH94P208   931.2  -3.728 
 OH95R208   931.2  -3.711 
 OH93P109  1089.0  -3.798 
 OH95R109  1089.0  -3.904 
 OH94P209  1141.9  -4.499 
 OH95R209  1141.9  -3.767 
 OH93P110  1326.2  -4.602 
 OH94R110  1326.2  -5.053 
 OH94P110  1326.2  -4.968 
 OH94P210  1375.2  -5.160 
 OH95R210  1375.2  -5.253 
 OH93P111  1585.1  -6.179 
 OH94P112  1865.0  -6.977 
