# Supplementary material for: OH level populations and accuracies of Einstein- A coefficients from hundreds of measured lines
Source: Copernicus journal article supplement (doi:10.5194/acp-20-5269-2020), 2020-05-06
Supplement: Supplementary file 2 [file acp-20-5269-2020-supplement.zip › OHpop_Acoeff_figdata/OHpop_Acoeff_fig13.dat]

# Data for Fig. 13 (including fits of Fig. 12) in
# 'OH level populations and accuracies of Einstein-A coefficients
# from hundreds of measured lines'
# by Noll et al.
#
# Columns:
# (1) v'
# Two-component fits for corrected B+16 Einstein-A coefficients:
# (2) cold population at E'(v',1,1) in Rs (10^6 cm^(-2))
# (3) error of cold population at E'(v',1,1) in Rs
# (4) temperature of cold population in K
# (5) error of temperature of cold population in K
# (6) hot population at E'(v',1,1) in Rs
# (7) error of hot population at E'(v',1,1) in Rs
# (8) temperature of hot population in K
# (9) error of temperature of hot population in K
# (10) ratio of hot and cold population at E'(v',1,1) in per cent
# (11) error of population ratio at E'(v',1,1) in per cent
# Rotational temperature for first three P1-branch lines in K:
# (12) two-component fit based on UVES data
# (13) related error
# (14) two-component fit based on Oliva et al. (2015)
# (15) Noll et al. (2016) for HITRAN coefficients
# (16) related error
# (17) Noll et al. (2016) for corrected B+16 coefficients
# (18) related error
# Remark: no data in columns (2) to (13) for v' = 2 and 3
#
#1      2     3       4     5      6      7       8      9    10    11    12    13    14     15    16     17    18
 2   0.00  0.00    0.00  0.00  0.000  0.000     0.0    0.0  0.00  0.00  0.00  0.00  0.59  -1.32  3.05  -1.98  4.41 
 3   0.00  0.00    0.00  0.00  0.000  0.000     0.0    0.0  0.00  0.00  0.00  0.00  0.91   3.25  2.60   1.29  3.44 
 4  37.10  1.79  196.40  4.41  0.121  0.008  6635.7  424.1  0.33  0.03  1.25  0.10  0.88   6.59  2.43   2.52  3.01 
 5  24.08  1.25  192.97  4.62  0.090  0.007  5952.1  568.6  0.37  0.04  1.37  0.13  1.44   5.83  2.31   2.53  2.95 
 6  14.91  0.52  189.87  3.03  0.077  0.003  4543.8  201.1  0.51  0.03  1.78  0.09  1.40   8.21  2.24   2.28  2.68 
 7  11.67  0.44  187.19  3.44  0.132  0.006  2181.3   54.1  1.13  0.06  3.47  0.18  5.08   5.77  2.17   2.58  2.84 
 8   9.24  0.22  190.50  2.72  0.155  0.010  1336.0   46.9  1.68  0.11  4.57  0.26  4.99  13.20  2.02   8.45  2.66 
 9   5.73  0.15  189.64  5.68  0.169  0.063   685.8  115.5  2.94  1.11  5.98  1.58  2.47   9.01  2.10   3.85  3.30 
