# Supplementary material for: OH level populations and accuracies of Einstein- A coefficients from hundreds of measured lines
Source: Copernicus journal article supplement (doi:10.5194/acp-20-5269-2020), 2020-05-06
Supplement: Supplementary file 2 [file acp-20-5269-2020-supplement.zip › OHpop_Acoeff_figdata/OHpop_Acoeff_fig14.dat]

# Data for Fig. 14 in
# 'OH level populations and accuracies of Einstein-A coefficients
# from hundreds of measured lines'
# by Noll et al.
#
# Columns:
# (1) line ID of type 'OH'+v'+v''+branch+F'+N'
# (2) E'(v',N',F') - E'(v',1,1) in cm^(-1)
# (3) Delta y for high versus low effective emission height
#
#       1       2       3
 OH40R102    71.9  -0.081 
 OH40R202   180.1  -0.079 
 OH40R103   173.2  -0.074 
 OH40R203   265.3  -0.085 
 OH40R104   304.2  -0.077 
 OH40R204   383.7  -0.077 
 OH40P105   465.1  -0.075 
 OH40R205   534.6  -0.083 
 OH40R106   655.9  -0.062 
 OH40P106   655.9  -0.061 
 OH40R107   876.7  -0.044 
 OH40R207   931.9  -0.036 
 OH40P207   931.9   0.020 
 OH40P210  1758.7   0.050 
 OH40P112  2421.5   0.011 
 OH40P113  2816.3   0.076 
 OH40P214  3271.0  -0.002 
 OH40P220  6342.9   0.191 
 OH51Q101     0.0  -0.050 
 OH51P101     0.0  -0.051 
 OH51Q201   129.3  -0.059 
 OH51P201   129.3  -0.052 
 OH51R102    69.0  -0.054 
 OH51P102    69.0  -0.052 
 OH51R202   178.3  -0.059 
 OH51P202   178.3  -0.055 
 OH51R103   166.1  -0.039 
 OH51P103   166.1  -0.054 
 OH51R203   259.5  -0.054 
 OH51P203   259.5  -0.054 
 OH51P104   291.5  -0.051 
 OH51P204   372.4  -0.055 
 OH51R105   445.5  -0.055 
 OH51Q105   445.5  -0.044 
 OH51P105   445.5  -0.054 
 OH51P205   516.5  -0.046 
 OH51R106   628.0  -0.044 
 OH51R206   691.1  -0.058 
 OH51P206   691.1  -0.016 
 OH51P107   839.2  -0.015 
 OH51P108  1078.7   0.018 
 OH51P208  1130.0   0.006 
 OH51P212  2352.9   0.039 
 OH51R113  2692.2   0.025 
 OH51P115  3524.1   0.062 
 OH51R215  3555.7  -0.019 
 OH51P215  3555.7   0.032 
 OH51P216  4008.0  -0.033 
 OH51P217  4485.0   0.114 
 OH51P120  6030.9   0.191 
 OH61P109  1284.8   0.017 
 OH61P209  1333.2   0.006 
 OH61P210  1611.1   0.086 
 OH62Q101     0.0  -0.038 
 OH62P101     0.0  -0.044 
 OH62Q201   129.8  -0.044 
 OH62P201   129.8  -0.041 
 OH62R102    66.0  -0.037 
 OH62Q102    66.0  -0.041 
 OH62P102    66.0  -0.037 
 OH62R202   176.4  -0.044 
 OH62Q202   176.4  -0.034 
 OH62P202   176.4  -0.036 
 OH62R103   158.8  -0.039 
 OH62Q103   158.8  -0.042 
 OH62P103   158.8  -0.040 
 OH62R203   253.6  -0.038 
 OH62P203   253.6  -0.036 
 OH62R104   278.6  -0.043 
 OH62Q104   278.6  -0.043 
 OH62P104   278.6  -0.032 
 OH62R204   361.1  -0.043 
 OH62Q204   361.1  -0.038 
 OH62P204   361.1  -0.043 
 OH62R205   498.2  -0.046 
 OH62Q205   498.2  -0.034 
 OH62R206   664.4  -0.026 
 OH62R107   801.3   0.034 
 OH62R207   859.3   0.002 
 OH62P108  1029.7   0.005 
 OH62P208  1082.4   0.023 
 OH62R109  1284.8   0.052 
 OH62P109  1284.8   0.027 
 OH62R209  1333.2   0.027 
 OH62P209  1333.2   0.068 
 OH62R110  1566.5   0.051 
 OH62R210  1611.1   0.048 
 OH62R111  1874.4  -0.015 
 OH62P111  1874.4  -0.004 
 OH62R211  1915.8   0.081 
 OH62R112  2207.9   0.054 
 OH62R212  2246.6   0.046 
 OH62P212  2246.6   0.072 
 OH62R113  2566.8   0.036 
 OH62P113  2566.8   0.016 
 OH62R213  2603.2   0.000 
 OH62P213  2603.2  -0.000 
 OH62P114  2950.4   0.062 
 OH62P214  2984.8  -0.030 
 OH62R115  3358.3   0.058 
 OH62P115  3358.3   0.013 
 OH62R215  3390.9   0.082 
 OH62P215  3390.9   0.010 
 OH72Q101     0.0  -0.032 
 OH72Q201   130.2  -0.028 
 OH72P201   130.2  -0.031 
 OH72R102    62.9  -0.028 
 OH72R202   174.4  -0.012 
 OH72P202   174.4  -0.033 
 OH72Q103   151.3  -0.018 
 OH72P103   151.3  -0.034 
 OH72R203   247.6  -0.017 
 OH72P203   247.6  -0.034 
 OH72R104   265.4  -0.028 
 OH72Q104   265.4  -0.035 
 OH72P104   265.4  -0.030 
 OH72R204   349.5  -0.028 
 OH72P204   349.5  -0.031 
 OH72R105   405.4  -0.019 
 OH72Q105   405.4  -0.020 
 OH72P105   405.4  -0.036 
 OH72P205   479.6  -0.019 
 OH72P206   637.3  -0.011 
 OH72R107   762.6   0.035 
 OH72R207   822.2   0.035 
 OH72R108   979.6  -0.043 
 OH72P108   979.6   0.021 
 OH72R208  1033.9  -0.022 
 OH72P208  1033.9   0.040 
 OH72R109  1222.1   0.054 
 OH72P209  1271.8   0.019 
 OH72P110  1489.5   0.017 
 OH72P210  1535.5   0.023 
 OH72P111  1781.7   0.053 
 OH72R211  1824.4   0.022 
 OH72P212  2138.1   0.047 
 OH72P113  2438.5   0.016 
 OH72P214  2837.6   0.032 
 OH73Q101     0.0  -0.040 
 OH73P101     0.0  -0.037 
 OH73Q201   130.2  -0.043 
 OH73R102    62.9  -0.036 
 OH73Q102    62.9  -0.036 
 OH73P102    62.9  -0.042 
 OH73R202   174.4  -0.021 
 OH73P202   174.4  -0.035 
 OH73R103   151.3  -0.031 
 OH73Q103   151.3  -0.052 
 OH73P103   151.3  -0.039 
 OH73R203   247.6  -0.035 
 OH73Q203   247.6  -0.006 
 OH73P203   247.6  -0.040 
 OH73P104   265.4  -0.042 
 OH73P204   349.5  -0.039 
 OH73R105   405.4  -0.027 
 OH73Q105   405.4   0.031 
 OH73P105   405.4  -0.043 
 OH73Q205   479.6   0.148 
 OH73P205   479.6  -0.014 
 OH73R106   571.1  -0.016 
 OH73Q106   571.1   0.340 
 OH73P106   571.1  -0.030 
 OH73P107   762.6   0.019 
 OH73P208  1033.9  -0.026 
 OH73P109  1222.1   0.028 
 OH73R209  1271.8  -0.011 
 OH73P209  1271.8   0.001 
 OH73R110  1489.5   0.014 
 OH73R210  1535.5   0.049 
 OH73P210  1535.5   0.040 
 OH73R111  1781.7   0.033 
 OH73R212  2138.1   0.075 
 OH73R113  2438.5   0.024 
 OH73R213  2476.0   0.090 
 OH73R114  2802.1   0.079 
 OH83Q101     0.0  -0.026 
 OH83P101     0.0  -0.028 
 OH83Q201   130.6  -0.017 
 OH83P201   130.6  -0.029 
 OH83Q102    59.7  -0.023 
 OH83P102    59.7  -0.030 
 OH83R202   172.2  -0.028 
 OH83Q202   172.2  -0.019 
 OH83P202   172.2  -0.029 
 OH83R103   143.6  -0.027 
 OH83Q103   143.6  -0.023 
 OH83P103   143.6  -0.026 
 OH83P203   241.3  -0.021 
 OH83R104   251.8  -0.027 
 OH83Q104   251.8  -0.011 
 OH83P104   251.8  -0.028 
 OH83R204   337.5  -0.025 
 OH83P204   337.5  -0.024 
 OH83R105   384.4  -0.000 
 OH83P105   384.4  -0.012 
 OH83R205   460.3  -0.025 
 OH83P205   460.3  -0.020 
 OH83P106   541.4  -0.012 
 OH83P206   609.3   0.000 
 OH83R107   722.6   0.004 
 OH83R207   783.9  -0.005 
 OH83P207   783.9  -0.003 
 OH83R208   983.8   0.042 
 OH83R209  1208.4   0.033 
 OH83R210  1457.3   0.078 
 OH83P210  1457.3   0.055 
 OH83R111  1685.9   0.005 
 OH83P211  1730.0   0.040 
 OH83R112  1984.6   0.023 
 OH83R113  2305.6   0.087 
 OH84Q101     0.0  -0.030 
 OH84P101     0.0  -0.026 
 OH84Q201   130.6  -0.031 
 OH84P201   130.6  -0.031 
 OH84R202   172.2  -0.019 
 OH84Q202   172.2  -0.025 
 OH84P202   172.2  -0.032 
 OH84R103   143.6  -0.019 
 OH84Q103   143.6  -0.040 
 OH84Q203   241.3  -0.024 
 OH84R104   251.8  -0.024 
 OH84Q204   337.5   0.004 
 OH84R105   384.4  -0.031 
 OH84R206   609.3  -0.037 
 OH84R108   927.9   0.032 
 OH84R109  1157.1   0.023 
 OH84R210  1457.3   0.031 
 OH84R212  2025.9   0.044 
 OH94Q101     0.0  -0.010 
 OH94P101     0.0  -0.011 
 OH94Q201   130.7  -0.021 
 OH94P201   130.7  -0.013 
 OH94Q102    56.4  -0.012 
 OH94P102    56.4  -0.010 
 OH94R202   169.8   0.000 
 OH94Q202   169.8  -0.005 
 OH94P202   169.8  -0.012 
 OH94R103   135.5  -0.007 
 OH94Q103   135.5  -0.008 
 OH94R203   234.6  -0.008 
 OH94Q203   234.6  -0.011 
 OH94P203   234.6  -0.009 
 OH94R104   237.5  -0.005 
 OH94P104   237.5  -0.014 
 OH94R204   324.8  -0.010 
 OH94P204   324.8  -0.010 
 OH94R105   362.4  -0.006 
 OH94Q105   362.4  -0.022 
 OH94P106   510.1   0.001 
 OH94P206   579.8  -0.008 
 OH94R107   680.6   0.006 
 OH94R207   743.7  -0.063 
 OH94P207   743.7   0.010 
 OH94R108   873.6   0.022 
 OH94P108   873.6   0.021 
 OH94P208   931.2   0.037 
 OH94P110  1326.2  -0.010 
